# Supplementary material for: Chetomin, a SARS-CoV-2 3C-like Protease (3CLpro) Inhibitor: In Silico Screening, Enzyme Docking, Molecular Dynamics and Pharmacokinetics Analysis
Source: MDPI journal article supplement (doi:10.3390/v15010250), 2023-01-15
Supplement: s1 [file s1]

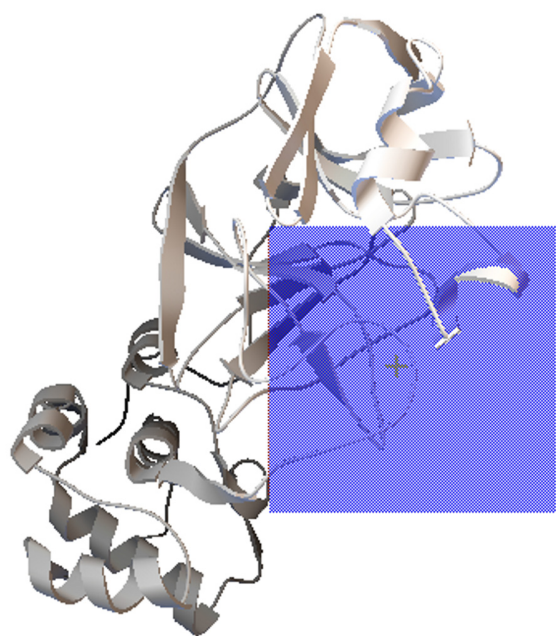

**Figure S1.** The employed grid box in Autodock computations.

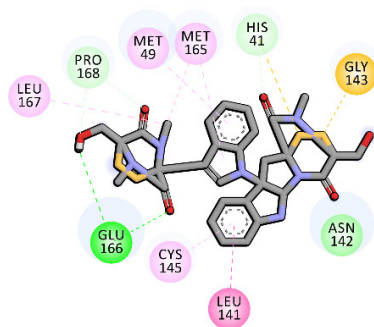

**UMHMNP1403367**

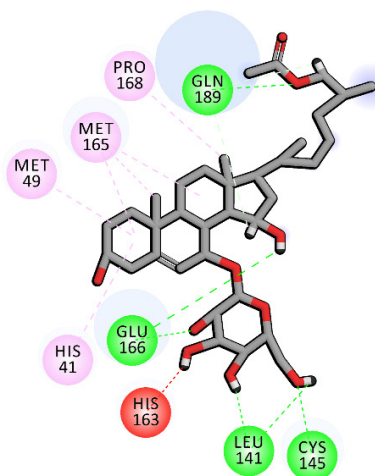

**UMHMNP101691127**

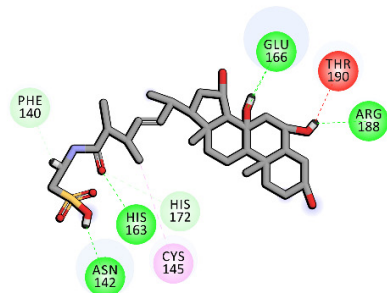

**UMHMNP791849666**

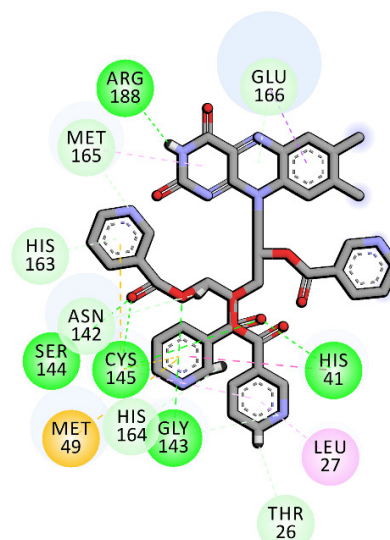

**UMHMNP14984668**

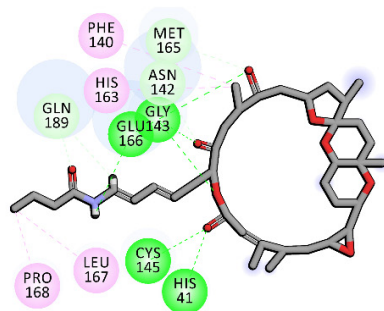

**UMHMNP143621754**

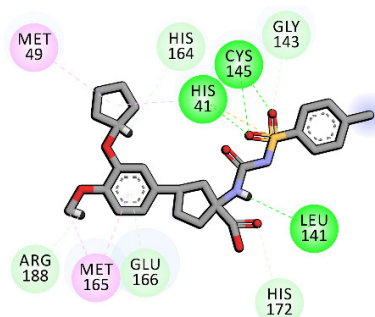

**UMHMNP148839036**

**Figure S2.** 2D representation of binding modes and interactions for top thirteen scoring drugs with the key amino acid residues of the 3CL<sup>PRO</sup> binding pocket.

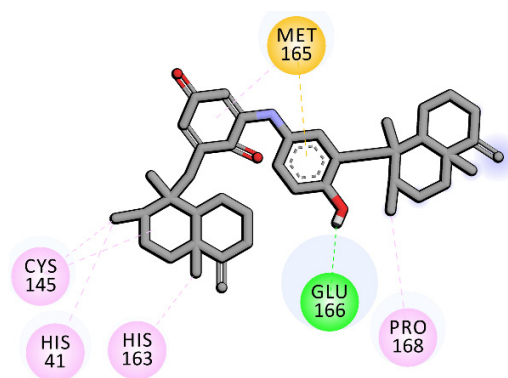

**UMHMNP133056072**

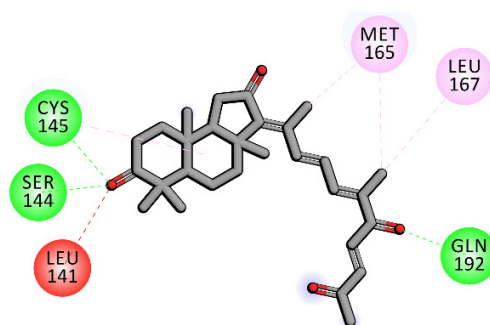

**UMHMNP386274857**

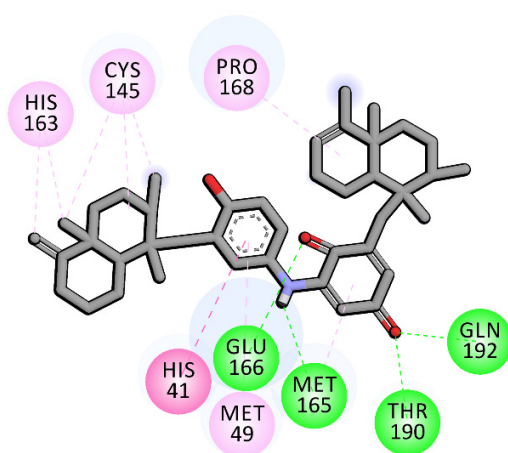

**UMHMNP133056094**

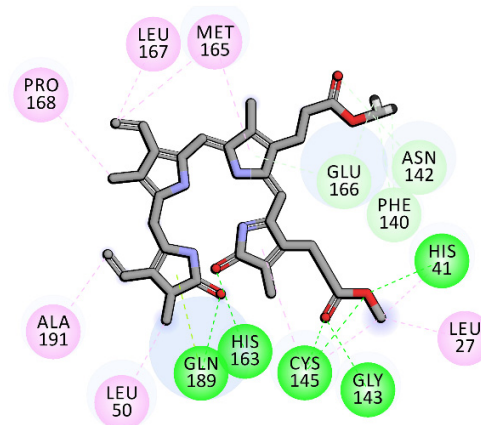

**UMHMNP26195584**

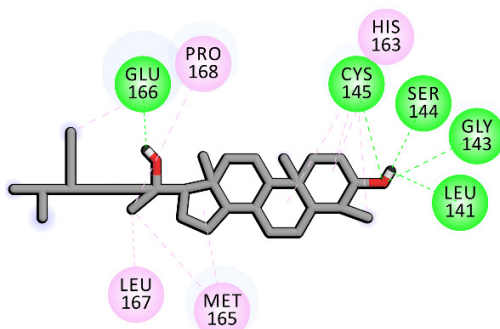

**UMHMNP874383707**

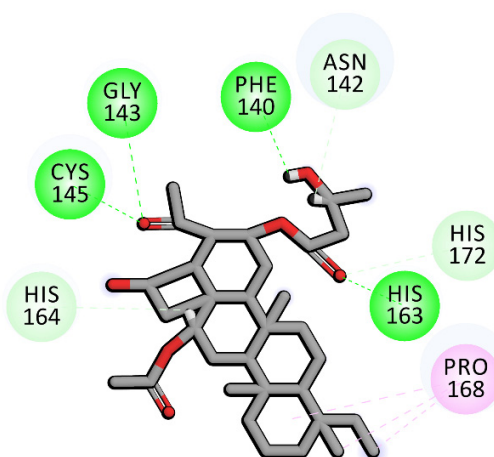

**UMHMNP221163300**

**Figure S2. Continued.**

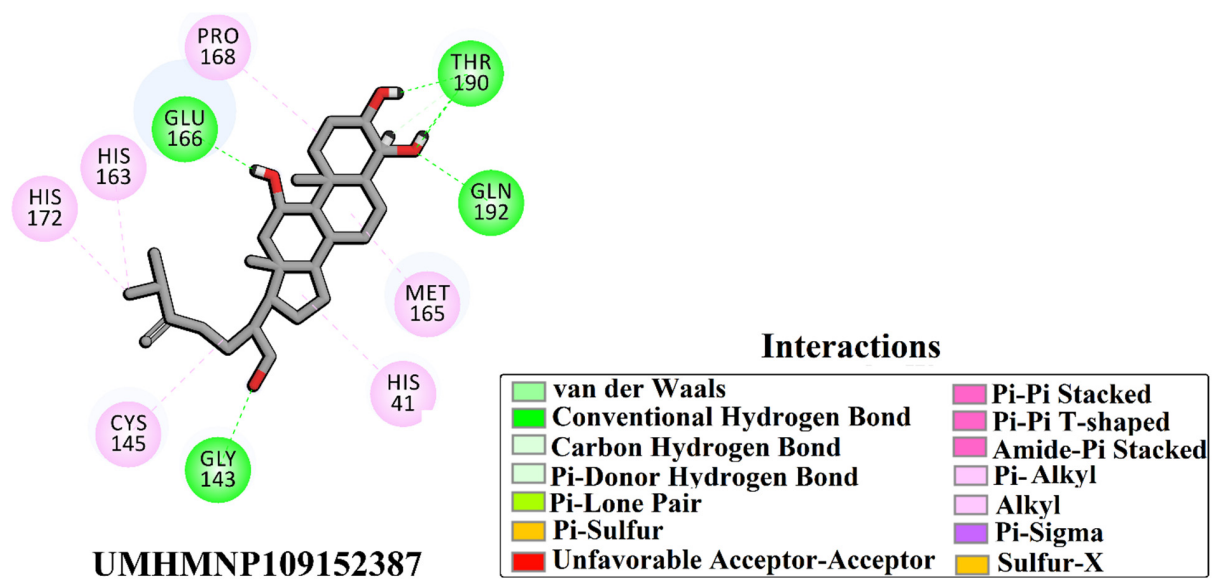

**Figure S2.** *Continued.*

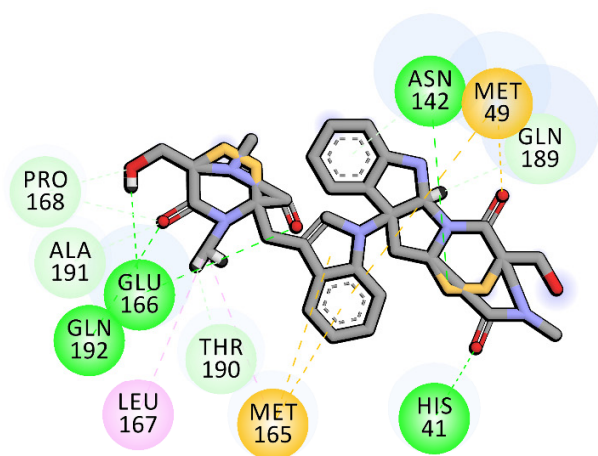

(a) UMHMNP1403367

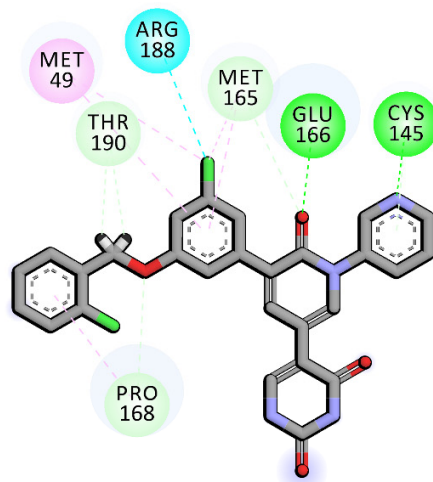

(b) XF7

## Interactions

■ Conventional Hydrogen Bond

■ Carbon Hydrogen Bond

■ Pi-Donor Hydrogen Bond

■ Halogen (Cl, Br, I)

■ Pi-Alkyl

■ Alkyl

■ Pi-Sulfur

■ Sulfur-X

**Figure S3.** 2D molecular interaction pattern of binding modes of (a) UMHMNP1403367 and (b) XF7 complexed with 3CL<sup>pro</sup> based on the average structure over a 200 ns MD simulation

**Table S1.** Estimated fast and moderate docking scores (in kcal/mol) for top 2686 MNPs towards 3CL<sup>pro</sup>.<sup>a</sup>

| No. | Compound Name/Code | Docking Score (kcal/mol) |       | No. | Compound Name/Code | Docking Score (kcal/mol) |       | No. | Compound Name/Code | Docking Score (kcal/mol) |       |
|-----|--------------------|--------------------------|-------|-----|--------------------|--------------------------|-------|-----|--------------------|--------------------------|-------|
|     |                    | Fast                     | Mod.  |     |                    | Fast                     | Mod.  |     |                    | Fast                     | Mod.  |
|     | XF7                | -8.1                     | -9.2  |     |                    |                          |       |     |                    |                          |       |
| 1   | UMHMNP1403367      | -11.7                    | -12.2 | 53  | UMHMNP171674923    | -8.9                     | -10.8 | 105 | UMHMNP253195403    | -8.6                     | -10.4 |
| 2   | UMHMNP101691127    | -11.4                    | -12.1 | 54  | UMHMNP151484785    | -9.2                     | -10.8 | 106 | UMHMNP336825311    | -9.4                     | -10.4 |
| 3   | UMHMNP791849666    | -11.4                    | -11.9 | 55  | UMHMNP125035838    | -9.2                     | -10.7 | 107 | UMHMNP99528877     | -10.4                    | -10.4 |
| 4   | UMHMNP14984668     | -11.3                    | -11.7 | 56  | UMHMNP145400573    | -10.7                    | -10.7 | 108 | UMHMNP112663920    | -10.4                    | -10.4 |
| 5   | UMHMNP143621754    | -11.3                    | -11.7 | 57  | UMHMNP139975589    | -9.9                     | -10.7 | 109 | UMHMNP80981379     | -10.4                    | -10.4 |
| 6   | UMHMNP148839036    | -11.3                    | -11.6 | 58  | UMHMNP272458330    | -10.6                    | -10.7 | 110 | UMHMNP552839802    | -8.1                     | -10.4 |
| 7   | UMHMNP133056072    | -11.3                    | -11.6 | 59  | UMHMNP272458341    | -8.6                     | -10.7 | 111 | UMHMNP142755133    | -9.8                     | -10.4 |
| 8   | UMHMNP386274857    | -11.3                    | -11.6 | 60  | UMHMNP86708329     | -10.6                    | -10.7 | 112 | UMHMNP131727010    | -10.8                    | -10.4 |
| 9   | UMHMNP133056094    | -11.2                    | -11.5 | 61  | UMHMNP122143902    | -8.9                     | -10.7 | 113 | UMHMNP142796314    | -10.3                    | -10.4 |
| 10  | UMHMNP26195584     | -11.1                    | -11.5 | 62  | UMHMNP61369275     | -8.3                     | -10.7 | 114 | UMHMNP374819086    | -8.0                     | -10.4 |
| 11  | UMHMNP874383707    | -11.1                    | -11.5 | 63  | UMHMNP176666834    | -9.0                     | -10.7 | 115 | UMHMNP105404840    | -9.2                     | -10.4 |
| 12  | UMHMNP221163300    | -11.1                    | -11.4 | 64  | UMHMNP151078921    | -8.8                     | -10.7 | 116 | UMHMNP112953114    | -10.9                    | -10.4 |
| 13  | UMHMNP109152387    | -11.1                    | -11.4 | 65  | UMHMNP139765370    | -8.1                     | -10.7 | 117 | UMHMNP147395979    | -8.1                     | -10.4 |
| 14  | UMHMNP156953912    | -11.1                    | -11.4 | 66  | UMHMNP2497747      | -10.7                    | -10.7 | 118 | UMHMNP156953934    | -9.5                     | -10.4 |
| 15  | UMHMNP5035303      | -11.0                    | -11.4 | 67  | UMHMNP70139569     | -10.7                    | -10.7 | 119 | UMHMNP173792580    | -9.9                     | -10.4 |
| 16  | UMHMNP706784727    | -10.9                    | -11.3 | 68  | UMHMNP244157946    | -10.6                    | -10.7 | 120 | UMHMNP454476870    | -9.6                     | -10.4 |
| 17  | UMHMNP100942743    | -8.8                     | -11.2 | 69  | UMHMNP64421201     | -9.5                     | -10.7 | 121 | UMHMNP152845744    | -9.5                     | -10.4 |
| 18  | UMHMNP125398290    | -8.3                     | -11.2 | 70  | UMHMNP100942754    | -9.1                     | -10.7 | 122 | UMHMNP77944037     | -10.1                    | -10.4 |
| 19  | UMHMNP147362376    | -8.4                     | -11.2 | 71  | UMHMNP41410586     | -8.8                     | -10.7 | 123 | UMHMNP116477237    | -9.2                     | -10.3 |
| 20  | UMHMNP149444928    | -8.2                     | -11.2 | 72  | UMHMNP64548169     | -9.9                     | -10.7 | 124 | UMHMNP133613771    | -9.8                     | -10.3 |
| 21  | UMHMNP149764341    | -9.7                     | -11.2 | 73  | UMHMNP162830231    | -8.9                     | -10.6 | 125 | UMHMNP516869       | -8.4                     | -10.3 |
| 22  | UMHMNP150050138    | -9.9                     | -11.2 | 74  | UMHMNP351443759    | -8.4                     | -10.6 | 126 | UMHMNP97877695     | -10.3                    | -10.3 |
| 23  | UMHMNP151484694    | -9.3                     | -11.2 | 75  | UMHMNP852872925    | -9.7                     | -10.6 | 127 | UMHMNP623167715    | -9.8                     | -10.3 |
| 24  | UMHMNP153212852    | -8.4                     | -11.2 | 76  | UMHMNP152110093    | -8.1                     | -10.6 | 128 | UMHMNP151109545    | -8.9                     | -10.3 |
| 25  | UMHMNP157207915    | -8.3                     | -11.2 | 77  | UMHMNP159903670    | -8.4                     | -10.6 | 129 | UMHMNP152247922    | -8.6                     | -10.3 |
| 26  | UMHMNP157622601    | -9.5                     | -11.2 | 78  | UMHMNP74185049     | -9.6                     | -10.6 | 130 | UMHMNP19698669     | -9.5                     | -10.3 |
| 27  | UMHMNP167172987    | -8.1                     | -11.2 | 79  | UMHMNP161470231    | -8.9                     | -10.6 | 131 | UMHMNP6901606      | -10.3                    | -10.3 |
| 28  | UMHMNP184885890    | -9.5                     | -11.2 | 80  | UMHMNP165815816    | -8.5                     | -10.6 | 132 | UMHMNP890041675    | -9.7                     | -10.3 |
| 29  | UMHMNP22033870     | -8.7                     | -11.2 | 81  | UMHMNP143049165    | -8.9                     | -10.6 | 133 | UMHMNP116302386    | -10.4                    | -10.3 |
| 30  | UMHMNP224577348    | -10.8                    | -11.2 | 82  | UMHMNP124689652    | -9.0                     | -10.5 | 134 | UMHMNP131703156    | -10.9                    | -10.3 |
| 31  | UMHMNP5035304      | -8.7                     | -11.2 | 83  | UMHMNP22149695     | -9.4                     | -10.5 | 135 | UMHMNP117631502    | -8.5                     | -10.3 |
| 32  | UMHMNP76915247     | -10.9                    | -11.2 | 84  | UMHMNP129350181    | -8.2                     | -10.5 | 136 | UMHMNP142796303    | -10.2                    | -10.3 |
| 33  | UMHMNP823808555    | -10.9                    | -11.2 | 85  | UMHMNP153209111    | -8.6                     | -10.5 | 137 | UMHMNP175992991    | -10.0                    | -10.3 |
| 34  | UMHMNP120685112    | -8.5                     | -11.2 | 86  | UMHMNP110189043    | -9.5                     | -10.5 | 138 | UMHMNP186593839    | -9.1                     | -10.3 |
| 35  | UMHMNP162830264    | -8.3                     | -11.2 | 87  | UMHMNP244157957    | -10.4                    | -10.5 | 139 | UMHMNP21059154     | -8.3                     | -10.3 |
| 36  | UMHMNP153212863    | -10.6                    | -11.1 | 88  | UMHMNP77982800     | -10.4                    | -10.5 | 140 | UMHMNP126149904    | -8.8                     | -10.3 |
| 37  | UMHMNP154205182    | -8.8                     | -11.1 | 89  | UMHMNP150079951    | -10.9                    | -10.5 | 141 | UMHMNP140715851    | -10.3                    | -10.3 |
| 38  | UMHMNP174630070    | -10.9                    | -11.0 | 90  | UMHMNP175669279    | -8.9                     | -10.5 | 142 | UMHMNP142755144    | -9.5                     | -10.3 |
| 39  | UMHMNP94203539     | -9.9                     | -11.0 | 91  | UMHMNP54369118     | -8.9                     | -10.5 | 143 | UMHMNP161470253    | -10.0                    | -10.3 |
| 40  | UMHMNP116407160    | -8.2                     | -11.0 | 92  | UMHMNP566943746    | -9.1                     | -10.5 | 144 | UMHMNP870535129    | -9.9                     | -10.3 |
| 41  | UMHMNP106231258    | -10.0                    | -11.0 | 93  | UMHMNP868395884    | -10.2                    | -10.5 | 145 | UMHMNP97614647     | -10.1                    | -10.3 |
| 42  | UMHMNP162465807    | -9.7                     | -11.0 | 94  | UMHMNP221163311    | -9.6                     | -10.5 | 146 | UMHMNP91283919     | -10.1                    | -10.3 |
| 43  | UMHMNP58670636     | -9.5                     | -11.0 | 95  | UMHMNP70329281     | -10.1                    | -10.5 | 147 | UMHMNP196403926    | -8.2                     | -10.3 |
| 44  | UMHMNP86748314     | -10.8                    | -10.9 | 96  | UMHMNP18097671     | -9.6                     | -10.5 | 148 | UMHMNP23518981     | -8.6                     | -10.3 |
| 45  | UMHMNP154466372    | -9.5                     | -10.9 | 97  | UMHMNP290824474    | -8.8                     | -10.5 | 149 | UMHMNP2418453      | -10.0                    | -10.3 |
| 46  | UMHMNP116303       | -8.4                     | -10.9 | 98  | UMHMNP474395       | -10.2                    | -10.5 | 150 | UMHMNP386274868    | -8.9                     | -10.3 |
| 47  | UMHMNP890041722    | -10.8                    | -10.9 | 99  | UMHMNP741259858    | -10.1                    | -10.5 | 151 | UMHMNP29782658     | -8.8                     | -10.3 |
| 48  | UMHMNP664992272    | -9.0                     | -10.9 | 100 | UMHMNP6673683      | -10.3                    | -10.5 | 152 | UMHMNP54028465     | -9.0                     | -10.3 |
| 49  | UMHMNP6673661      | -9.6                     | -10.9 | 101 | UMHMNP827348072    | -10.2                    | -10.5 | 153 | UMHMNP61843796     | -8.5                     | -10.3 |
| 50  | UMHMNP444987637    | -8.8                     | -10.8 | 102 | UMHMNP107503093    | -10.0                    | -10.5 | 154 | UMHMNP888041267    | -9.3                     | -10.2 |
| 51  | UMHMNP131467000    | -10.7                    | -10.8 | 103 | UMHMNP132310908    | -9.3                     | -10.5 | 155 | UMHMNP152130615    | -10.5                    | -10.2 |
| 52  | UMHMNP757976673    | -10.2                    | -10.8 | 104 | UMHMNP126622648    | -8.1                     | -10.4 | 156 | UMHMNP170894367    | -9.3                     | -10.2 |

Table S1. Continued.

| No. | Compound Name/Code | Docking Score (kcal/mol) |       | No. | Compound Name/Code | Docking Score (kcal/mol) |       | No. | Compound Name/Code | Docking Score (kcal/mol) |       |
|-----|--------------------|--------------------------|-------|-----|--------------------|--------------------------|-------|-----|--------------------|--------------------------|-------|
|     |                    | Fast                     | Mod.  |     |                    | Fast                     | Mod.  |     |                    | Fast                     | Mod.  |
| 157 | UMHMNP6377180      | -9.8                     | -10.2 | 209 | UMHMNP97649042     | -10.1                    | -10.1 | 261 | UMHMNP136781958    | -9.0                     | -10.0 |
| 158 | UMHMNP72509616     | -10.2                    | -10.2 | 210 | UMHMNP102488584    | -10.1                    | -10.1 | 262 | UMHMNP139765347    | -9.7                     | -10.0 |
| 159 | UMHMNP870095344    | -9.0                     | -10.2 | 211 | UMHMNP1058613      | -9.9                     | -10.1 | 263 | UMHMNP26195584     | -8.7                     | -10.0 |
| 160 | UMHMNP82866339     | -8.5                     | -10.2 | 212 | UMHMNP29939977     | -8.6                     | -10.1 | 264 | UMHMNP333723981    | -8.7                     | -10.0 |
| 161 | UMHMNP862286702    | -8.9                     | -10.2 | 213 | UMHMNP55688432     | -9.5                     | -10.1 | 265 | UMHMNP57874        | -8.4                     | -10.0 |
| 162 | UMHMNP116972931    | -8.3                     | -10.2 | 214 | UMHMNP676271833    | -9.1                     | -10.1 | 266 | UMHMNP115268434    | -9.0                     | -10.0 |
| 163 | UMHMNP22260464     | -9.3                     | -10.2 | 215 | UMHMNP72007944     | -9.9                     | -10.1 | 267 | UMHMNP119147125    | -8.1                     | -10.0 |
| 164 | UMHMNP682808895    | -9.6                     | -10.2 | 216 | UMHMNP81826495     | -8.4                     | -10.1 | 268 | UMHMNP214899215    | -8.1                     | -10.0 |
| 165 | UMHMNP149355759    | -8.1                     | -10.2 | 217 | UMHMNP858950400    | -10.1                    | -10.1 | 269 | UMHMNP233607711    | -9.8                     | -10.0 |
| 166 | UMHMNP85733795     | -10.1                    | -10.2 | 218 | UMHMNP91683328     | -9.5                     | -10.1 | 270 | UMHMNP23670942     | -10.0                    | -10.0 |
| 167 | UMHMNP109152376    | -10.1                    | -10.2 | 219 | UMHMNP94935974     | -10.0                    | -10.1 | 271 | UMHMNP28949668     | -9.7                     | -10.0 |
| 168 | UMHMNP53216027     | -9.2                     | -10.2 | 220 | UMHMNP102396178    | -10.1                    | -10.1 | 272 | UMHMNP83115440     | -9.9                     | -10.0 |
| 169 | UMHMNP113592817    | -8.9                     | -10.2 | 221 | UMHMNP134131183    | -9.9                     | -10.1 | 273 | UMHMNP874193610    | -9.9                     | -10.0 |
| 170 | UMHMNP118574735    | -8.3                     | -10.2 | 222 | UMHMNP140715873    | -10.0                    | -10.1 | 274 | UMHMNP150050127    | -8.4                     | -10.0 |
| 171 | UMHMNP681227032    | -9.8                     | -10.2 | 223 | UMHMNP151247697    | -8.0                     | -10.1 | 275 | UMHMNP244157980    | -8.4                     | -10.0 |
| 172 | UMHMNP88191144     | -8.8                     | -10.2 | 224 | UMHMNP253340293    | -8.2                     | -10.1 | 276 | UMHMNP27065958     | -8.5                     | -10.0 |
| 173 | UMHMNP143380396    | -10.1                    | -10.2 | 225 | UMHMNP133562499    | -9.2                     | -10.1 | 277 | UMHMNP73792935     | -9.9                     | -10.0 |
| 174 | UMHMNP168569184    | -10.9                    | -10.2 | 226 | UMHMNP189083781    | -8.7                     | -10.1 | 278 | UMHMNP136762942    | -9.4                     | -10.0 |
| 175 | UMHMNP174630116    | -10.3                    | -10.2 | 227 | UMHMNP50909869     | -8.1                     | -10.1 | 279 | UMHMNP185014599    | -8.3                     | -10.0 |
| 176 | UMHMNP40446068     | -8.7                     | -10.2 | 228 | UMHMNP69081885     | -9.1                     | -10.1 | 280 | UMHMNP681260093    | -9.7                     | -10.0 |
| 177 | UMHMNP405095945    | -8.7                     | -10.2 | 229 | UMHMNP80925060     | -9.3                     | -10.1 | 281 | UMHMNP852469375    | -9.8                     | -10.0 |
| 178 | UMHMNP6891356      | -10.1                    | -10.2 | 230 | UMHMNP137576002    | -9.9                     | -10.0 | 282 | UMHMNP126297390    | -9.0                     | -9.9  |
| 179 | UMHMNP84025321     | -9.4                     | -10.2 | 231 | UMHMNP54854921     | -8.2                     | -10.0 | 283 | UMHMNP188112858    | -8.1                     | -9.9  |
| 180 | UMHMNP19254694     | -8.9                     | -10.2 | 232 | UMHMNP80375184     | -9.9                     | -10.0 | 279 | UMHMNP283176136    | -8.8                     | -9.9  |
| 181 | UMHMNP114127785    | -8.9                     | -10.1 | 233 | UMHMNP83681792     | -9.7                     | -10.0 | 284 | UMHMNP51744559     | -8.5                     | -9.9  |
| 182 | UMHMNP244157968    | -10.2                    | -10.1 | 234 | UMHMNP57800585     | -9.5                     | -10.0 | 285 | UMHMNP53296836     | -9.8                     | -9.9  |
| 183 | UMHMNP481141       | -8.8                     | -10.1 | 235 | UMHMNP832723736    | -9.6                     | -10.0 | 286 | UMHMNP121678873    | -9.7                     | -9.9  |
| 184 | UMHMNP154496874    | -10.9                    | -10.1 | 236 | UMHMNP866025629    | -8.6                     | -10.0 | 287 | UMHMNP135091111    | -8.4                     | -9.9  |
| 185 | UMHMNP166797746    | -8.3                     | -10.1 | 237 | UMHMNP53822983     | -8.5                     | -10.0 | 288 | UMHMNP139975578    | -8.3                     | -9.9  |
| 186 | UMHMNP74185129     | -8.8                     | -10.1 | 238 | UMHMNP56525736     | -8.7                     | -10.0 | 289 | UMHMNP143572730    | -10.5                    | -9.9  |
| 187 | UMHMNP83115473     | -9.2                     | -10.1 | 239 | UMHMNP78342388     | -9.4                     | -10.0 | 290 | UMHMNP151890812    | -8.7                     | -9.9  |
| 188 | UMHMNP104048171    | -9.9                     | -10.1 | 240 | UMHMNP105064300    | -9.5                     | -10.0 | 291 | UMHMNP213547285    | -8.8                     | -9.9  |
| 189 | UMHMNP165815849    | -8.5                     | -10.1 | 241 | UMHMNP123165800    | -8.1                     | -10.0 | 292 | UMHMNP32352651     | -9.4                     | -9.9  |
| 190 | UMHMNP58028232     | -8.4                     | -10.1 | 242 | UMHMNP75605855     | -9.8                     | -10.0 | 293 | UMHMNP3903579      | -8.2                     | -9.9  |
| 191 | UMHMNP201800615    | -8.7                     | -10.1 | 243 | UMHMNP76094569     | -10.0                    | -10.0 | 294 | UMHMNP851610907    | -10.0                    | -9.9  |
| 192 | UMHMNP217449199    | -8.1                     | -10.1 | 244 | UMHMNP84223030     | -9.7                     | -10.0 | 295 | UMHMNP123158907    | -9.6                     | -9.9  |
| 193 | UMHMNP83704103     | -8.8                     | -10.1 | 245 | UMHMNP854203784    | -9.9                     | -10.0 | 296 | UMHMNP150931832    | -8.3                     | -9.9  |
| 194 | UMHMNP876620245    | -9.8                     | -10.1 | 246 | UMHMNP99617386     | -10.0                    | -10.0 | 297 | UMHMNP871943985    | -9.8                     | -9.9  |
| 195 | UMHMNP94451215     | -9.9                     | -10.1 | 247 | UMHMNP129623309    | -8.4                     | -10.0 | 298 | UMHMNP102054455    | -9.5                     | -9.9  |
| 196 | UMHMNP104928305    | -10.0                    | -10.1 | 248 | UMHMNP134128168    | -9.5                     | -10.0 | 299 | UMHMNP143592249    | -8.4                     | -9.9  |
| 197 | UMHMNP123314216    | -8.4                     | -10.1 | 249 | UMHMNP4298004      | -8.8                     | -10.0 | 300 | UMHMNP199600390    | -8.6                     | -9.9  |
| 198 | UMHMNP244157979    | -10.0                    | -10.1 | 250 | UMHMNP53296847     | -8.3                     | -10.0 | 301 | UMHMNP2122987      | -8.7                     | -9.9  |
| 199 | UMHMNP260436279    | -8.1                     | -10.1 | 251 | UMHMNP876756568    | -9.9                     | -10.0 | 302 | UMHMNP479411455    | -8.5                     | -9.9  |
| 200 | UMHMNP393870332    | -9.1                     | -10.1 | 252 | UMHMNP90108637     | -8.9                     | -10.0 | 303 | UMHMNP62410962     | -8.2                     | -9.9  |
| 201 | UMHMNP50335030     | -10.1                    | -10.1 | 253 | UMHMNP224576027    | -9.2                     | -10.0 | 304 | UMHMNP693790748    | -9.8                     | -9.9  |
| 202 | UMHMNP196500784    | -9.2                     | -10.1 | 254 | UMHMNP25747448     | -9.7                     | -10.0 | 305 | UMHMNP753457942    | -9.8                     | -9.9  |
| 203 | UMHMNP211358666    | -9.1                     | -10.1 | 255 | UMHMNP858950444    | -10.0                    | -10.0 | 306 | UMHMNP85733762     | -9.8                     | -9.9  |
| 204 | UMHMNP221169762    | -8.6                     | -10.1 | 256 | UMHMNP94806049     | -9.9                     | -10.0 | 307 | UMHMNP14050625     | -9.4                     | -9.9  |
| 205 | UMHMNP57082367     | -9.1                     | -10.1 | 257 | UMHMNP110012185    | -9.9                     | -10.0 | 308 | UMHMNP160098931    | -8.5                     | -9.9  |
| 206 | UMHMNP63109193     | -9.0                     | -10.1 | 258 | UMHMNP117675191    | -9.0                     | -10.0 | 309 | UMHMNP200942183    | -8.3                     | -9.9  |
| 207 | UMHMNP735278281    | -10.0                    | -10.1 | 259 | UMHMNP128229641    | -8.6                     | -10.0 | 310 | UMHMNP34212936     | -8.3                     | -9.9  |
| 208 | UMHMNP93426905     | -10.1                    | -10.1 | 260 | UMHMNP133883224    | -9.8                     | -10.0 | 311 | UMHMNP474624       | -9.8                     | -9.9  |

Table S1. Continued.

| No. | Compound Name/Code | Docking Score (kcal/mol) |      | No. | Compound Name/Code | Docking Score (kcal/mol) |      | No. | Compound Name/Code | Docking Score (kcal/mol) |      |
|-----|--------------------|--------------------------|------|-----|--------------------|--------------------------|------|-----|--------------------|--------------------------|------|
|     |                    | Fast                     | Mod. |     |                    | Fast                     | Mod. |     |                    | Fast                     | Mod. |
| 312 | UMHMNP810685564    | -9.3                     | -9.9 | 364 | UMHMNP133738484    | -9.8                     | -9.8 | 416 | UMHMNP75197385     | -9.5                     | -9.8 |
| 313 | UMHMNP97564948     | -8.6                     | -9.9 | 365 | UMHMNP188111708    | -8.3                     | -9.8 | 417 | UMHMNP752211908    | -9.7                     | -9.8 |
| 314 | UMHMNP103065209    | -9.5                     | -9.9 | 366 | UMHMNP80735064     | -8.7                     | -9.8 | 418 | UMHMNP771534362    | -9.7                     | -9.8 |
| 315 | UMHMNP125329091    | -10.9                    | -9.9 | 367 | UMHMNP106534445    | -8.9                     | -9.8 | 419 | UMHMNP866403716    | -9.6                     | -9.8 |
| 316 | UMHMNP142755155    | -9.8                     | -9.9 | 368 | UMHMNP168569151    | -8.3                     | -9.8 | 420 | UMHMNP96363063     | -9.3                     | -9.8 |
| 317 | UMHMNP151564022    | -10.7                    | -9.9 | 369 | UMHMNP233607697    | -9.7                     | -9.8 | 421 | UMHMNP97190313     | -8.8                     | -9.8 |
| 318 | UMHMNP168004851    | -8.5                     | -9.9 | 370 | UMHMNP720681630    | -9.8                     | -9.8 | 422 | UMHMNP104196681    | -9.7                     | -9.8 |
| 319 | UMHMNP208927155    | -9.4                     | -9.9 | 371 | UMHMNP97889560     | -9.7                     | -9.8 | 423 | UMHMNP1247649      | -8.5                     | -9.8 |
| 320 | UMHMNP211358655    | -8.6                     | -9.9 | 372 | UMHMNP477935969    | -9.7                     | -9.8 | 424 | UMHMNP134887266    | -9.7                     | -9.8 |
| 321 | UMHMNP272118066    | -9.6                     | -9.9 | 373 | UMHMNP493889       | -9.7                     | -9.8 | 425 | UMHMNP18099246     | -8.9                     | -9.8 |
| 322 | UMHMNP329050228    | -8.5                     | -9.9 | 374 | UMHMNP78285844     | -8.8                     | -9.8 | 426 | UMHMNP334491257    | -8.4                     | -9.8 |
| 323 | UMHMNP329050251    | -8.1                     | -9.9 | 375 | UMHMNP123332876    | -8.3                     | -9.8 | 427 | UMHMNP102054466    | -8.3                     | -9.7 |
| 324 | UMHMNP870535118    | -9.8                     | -9.9 | 376 | UMHMNP149260800    | -9.1                     | -9.8 | 428 | UMHMNP112455842    | -9.7                     | -9.7 |
| 325 | UMHMNP114216909    | -9.2                     | -9.9 | 377 | UMHMNP168075147    | -8.2                     | -9.8 | 429 | UMHMNP116079539    | -8.9                     | -9.7 |
| 326 | UMHMNP136762997    | -9.7                     | -9.9 | 378 | UMHMNP172377503    | -9.7                     | -9.8 | 430 | UMHMNP122548032    | -8.8                     | -9.7 |
| 327 | UMHMNP264624397    | -9.8                     | -9.9 | 379 | UMHMNP185331946    | -9.5                     | -9.8 | 431 | UMHMNP153209122    | -8.3                     | -9.7 |
| 328 | UMHMNP334491279    | -9.3                     | -9.9 | 380 | UMHMNP2140467      | -9.2                     | -9.8 | 432 | UMHMNP219832378    | -8.6                     | -9.7 |
| 329 | UMHMNP38636509     | -8.7                     | -9.9 | 381 | UMHMNP4030926      | -8.2                     | -9.8 | 433 | UMHMNP823804837    | -9.7                     | -9.7 |
| 330 | UMHMNP5371540      | -9.3                     | -9.9 | 382 | UMHMNP102054477    | -9.5                     | -9.8 | 434 | UMHMNP852872936    | -8.4                     | -9.7 |
| 331 | UMHMNP125127573    | -8.3                     | -9.9 | 383 | UMHMNP144686420    | -9.7                     | -9.8 | 435 | UMHMNP85733739     | -8.4                     | -9.7 |
| 332 | UMHMNP134887277    | -9.8                     | -9.9 | 384 | UMHMNP151890834    | -8.5                     | -9.8 | 436 | UMHMNP102607761    | -9.6                     | -9.7 |
| 333 | UMHMNP140389497    | -8.4                     | -9.9 | 385 | UMHMNP155656023    | -8.9                     | -9.8 | 437 | UMHMNP142780436    | -8.9                     | -9.7 |
| 334 | UMHMNP214483155    | -8.7                     | -9.9 | 386 | UMHMNP179523387    | -8.6                     | -9.8 | 438 | UMHMNP149378563    | -9.0                     | -9.7 |
| 335 | UMHMNP24778516     | -9.7                     | -9.9 | 387 | UMHMNP2364230      | -9.7                     | -9.8 | 439 | UMHMNP186593862    | -8.4                     | -9.7 |
| 336 | UMHMNP32450252     | -8.7                     | -9.9 | 388 | UMHMNP4736565      | -8.7                     | -9.8 | 440 | UMHMNP20780410     | -8.0                     | -9.7 |
| 337 | UMHMNP76758219     | -9.7                     | -9.9 | 389 | UMHMNP55544359     | -8.5                     | -9.8 | 441 | UMHMNP229956472    | -9.5                     | -9.7 |
| 338 | UMHMNP851610861    | -9.7                     | -9.9 | 390 | UMHMNP80388507     | -8.2                     | -9.8 | 442 | UMHMNP63121062     | -9.5                     | -9.7 |
| 339 | UMHMNP121714747    | -9.5                     | -9.9 | 391 | UMHMNP858950557    | -9.8                     | -9.8 | 443 | UMHMNP693790737    | -9.7                     | -9.7 |
| 340 | UMHMNP124561202    | -9.3                     | -9.9 | 392 | UMHMNP196500762    | -9.3                     | -9.8 | 444 | UMHMNP82154210     | -9.7                     | -9.7 |
| 341 | UMHMNP162232395    | -8.2                     | -9.9 | 393 | UMHMNP19716268     | -8.1                     | -9.8 | 445 | UMHMNP88147197     | -8.5                     | -9.7 |
| 342 | UMHMNP233607722    | -9.9                     | -9.9 | 394 | UMHMNP37976888     | -9.1                     | -9.8 | 446 | UMHMNP105969640    | -8.2                     | -9.7 |
| 343 | UMHMNP383859607    | -8.1                     | -9.9 | 395 | UMHMNP473030       | -8.6                     | -9.8 | 447 | UMHMNP200625269    | -8.6                     | -9.7 |
| 344 | UMHMNP640734878    | -9.1                     | -9.9 | 396 | UMHMNP50909858     | -9.9                     | -9.8 | 448 | UMHMNP264624422    | -9.4                     | -9.7 |
| 345 | UMHMNP90195418     | -8.4                     | -9.9 | 397 | UMHMNP78183296     | -9.7                     | -9.8 | 449 | UMHMNP71242494     | -8.4                     | -9.7 |
| 346 | UMHMNP135340000    | -9.9                     | -9.9 | 398 | UMHMNP85617750     | -8.9                     | -9.8 | 450 | UMHMNP85733784     | -9.7                     | -9.7 |
| 347 | UMHMNP171090792    | -8.3                     | -9.9 | 399 | UMHMNP862587186    | -9.0                     | -9.8 | 451 | UMHMNP863919179    | -9.3                     | -9.7 |
| 348 | UMHMNP264624400    | -9.0                     | -9.9 | 400 | UMHMNP866025630    | -8.1                     | -9.8 | 452 | UMHMNP97888158     | -8.7                     | -9.7 |
| 349 | UMHMNP306971120    | -8.7                     | -9.9 | 401 | UMHMNP117417626    | -9.8                     | -9.8 | 453 | UMHMNP115982202    | -8.7                     | -9.7 |
| 350 | UMHMNP847605769    | -9.8                     | -9.9 | 402 | UMHMNP14908168     | -8.9                     | -9.8 | 454 | UMHMNP131487019    | -9.1                     | -9.7 |
| 351 | UMHMNP886851269    | -8.3                     | -9.9 | 403 | UMHMNP160666546    | -9.5                     | -9.8 | 455 | UMHMNP141754576    | -8.8                     | -9.7 |
| 352 | UMHMNP89495476     | -9.6                     | -9.9 | 404 | UMHMNP172854772    | -8.2                     | -9.8 | 456 | UMHMNP149415769    | -8.4                     | -9.7 |
| 353 | UMHMNP114820290    | -8.5                     | -9.8 | 405 | UMHMNP4680379      | -8.8                     | -9.8 | 457 | UMHMNP197381605    | -8.8                     | -9.7 |
| 354 | UMHMNP150627364    | -8.5                     | -9.8 | 406 | UMHMNP53296665     | -9.6                     | -9.8 | 458 | UMHMNP21371718     | -8.7                     | -9.7 |
| 355 | UMHMNP151606405    | -9.4                     | -9.8 | 407 | UMHMNP81387839     | -9.8                     | -9.8 | 459 | UMHMNP219832356    | -9.7                     | -9.7 |
| 356 | UMHMNP224784489    | -9.7                     | -9.8 | 408 | UMHMNP83115484     | -9.3                     | -9.8 | 460 | UMHMNP221169739    | -8.8                     | -9.7 |
| 357 | UMHMNP55945749     | -8.9                     | -9.8 | 409 | UMHMNP121994512    | -8.8                     | -9.8 | 461 | UMHMNP34751252     | -8.2                     | -9.7 |
| 358 | UMHMNP56121427     | -8.5                     | -9.8 | 410 | UMHMNP149260742    | -9.0                     | -9.8 | 462 | UMHMNP75917894     | -9.6                     | -9.7 |
| 359 | UMHMNP73622238     | -9.6                     | -9.8 | 411 | UMHMNP157459240    | -8.6                     | -9.8 | 463 | UMHMNP10530554     | -9.7                     | -9.7 |
| 360 | UMHMNP76758208     | -9.6                     | -9.8 | 412 | UMHMNP161776767    | -9.3                     | -9.8 | 464 | UMHMNP131711369    | -9.7                     | -9.7 |
| 361 | UMHMNP78094005     | -8.8                     | -9.8 | 413 | UMHMNP607388874    | -8.7                     | -9.8 | 465 | UMHMNP151606245    | -9.3                     | -9.7 |
| 362 | UMHMNP858950466    | -9.8                     | -9.8 | 414 | UMHMNP648428324    | -9.5                     | -9.8 | 466 | UMHMNP160666524    | -8.1                     | -9.7 |
| 363 | UMHMNP108868957    | -8.8                     | -9.8 | 415 | UMHMNP7273349      | -9.4                     | -9.8 | 467 | UMHMNP194148997    | -8.8                     | -9.7 |

Table S1. Continued.

| No. | Compound Name/Code | Docking Score (kcal/mol) |      | No. | Compound Name/Code | Docking Score (kcal/mol) |      | No. | Compound Name/Code | Docking Score (kcal/mol) |      |
|-----|--------------------|--------------------------|------|-----|--------------------|--------------------------|------|-----|--------------------|--------------------------|------|
|     |                    | Fast                     | Mod. |     |                    | Fast                     | Mod. |     |                    | Fast                     | Mod. |
| 468 | UMHMNP223271770    | -9.3                     | -9.7 | 520 | UMHMNP169387728    | -9.6                     | -9.6 | 572 | UMHMNP232585158    | -8.4                     | -9.6 |
| 469 | UMHMNP478364180    | -9.6                     | -9.7 | 521 | UMHMNP204716041    | -8.3                     | -9.6 | 573 | UMHMNP368421356    | -9.3                     | -9.6 |
| 470 | UMHMNP59048872     | -9.1                     | -9.7 | 522 | UMHMNP290353683    | -10.3                    | -9.6 | 574 | UMHMNP433717385    | -8.2                     | -9.6 |
| 471 | UMHMNP85748125     | -9.5                     | -9.7 | 523 | UMHMNP459832678    | -8.1                     | -9.6 | 575 | UMHMNP477885384    | -9.2                     | -9.6 |
| 472 | UMHMNP114550753    | -8.6                     | -9.7 | 524 | UMHMNP474679       | -9.2                     | -9.6 | 576 | UMHMNP96603020     | -9.5                     | -9.6 |
| 473 | UMHMNP114820278    | -9.4                     | -9.7 | 525 | UMHMNP567726       | -9.1                     | -9.6 | 577 | UMHMNP109152398    | -9.0                     | -9.6 |
| 474 | UMHMNP171784091    | -9.5                     | -9.7 | 526 | UMHMNP61947942     | -8.5                     | -9.6 | 578 | UMHMNP121714769    | -8.7                     | -9.6 |
| 475 | UMHMNP287965280    | -8.9                     | -9.7 | 527 | UMHMNP78285866     | -9.2                     | -9.6 | 579 | UMHMNP452934951    | -8.9                     | -9.6 |
| 476 | UMHMNP681240608    | -9.2                     | -9.7 | 528 | UMHMNP83454        | -9.4                     | -9.6 | 580 | UMHMNP55309687     | -8.1                     | -9.6 |
| 477 | UMHMNP134981785    | -9.6                     | -9.7 | 529 | UMHMNP86105648     | -9.5                     | -9.6 | 581 | UMHMNP71947643     | -8.0                     | -9.6 |
| 478 | UMHMNP149764329    | -8.5                     | -9.7 | 530 | UMHMNP113597038    | -9.1                     | -9.6 | 582 | UMHMNP73731245     | -9.4                     | -9.6 |
| 479 | UMHMNP211239417    | -8.4                     | -9.7 | 531 | UMHMNP148371088    | -9.6                     | -9.6 | 583 | UMHMNP78370840     | -8.9                     | -9.6 |
| 480 | UMHMNP75795890     | -9.7                     | -9.7 | 532 | UMHMNP148717913    | -9.1                     | -9.6 | 584 | UMHMNP80357999     | -9.2                     | -9.6 |
| 481 | UMHMNP882524916    | -9.5                     | -9.7 | 533 | UMHMNP173681522    | -9.4                     | -9.6 | 585 | UMHMNP107168570    | -9.6                     | -9.5 |
| 482 | UMHMNP96886123     | -9.4                     | -9.7 | 534 | UMHMNP2643029      | -8.2                     | -9.6 | 586 | UMHMNP107585013    | -9.5                     | -9.5 |
| 483 | UMHMNP123158952    | -8.9                     | -9.7 | 535 | UMHMNP92264136     | -9.1                     | -9.6 | 587 | UMHMNP114820245    | -9.4                     | -9.5 |
| 484 | UMHMNP152110082    | -8.5                     | -9.7 | 536 | UMHMNP100942721    | -9.1                     | -9.6 | 588 | UMHMNP120154963    | -8.6                     | -9.5 |
| 485 | UMHMNP157459251    | -9.8                     | -9.7 | 537 | UMHMNP115982199    | -9.4                     | -9.6 | 589 | UMHMNP12903305     | -8.3                     | -9.5 |
| 486 | UMHMNP159813679    | -8.2                     | -9.7 | 538 | UMHMNP141344107    | -8.9                     | -9.6 | 590 | UMHMNP172854783    | -9.2                     | -9.5 |
| 487 | UMHMNP675106226    | -9.1                     | -9.7 | 539 | UMHMNP141754587    | -8.2                     | -9.6 | 591 | UMHMNP184584405    | -9.4                     | -9.5 |
| 488 | UMHMNP139765336    | -8.8                     | -9.7 | 540 | UMHMNP26040006     | -9.6                     | -9.6 | 592 | UMHMNP3963379      | -8.3                     | -9.5 |
| 489 | UMHMNP171864805    | -9.4                     | -9.7 | 541 | UMHMNP306997397    | -8.8                     | -9.6 | 593 | UMHMNP54602072     | -9.2                     | -9.5 |
| 490 | UMHMNP481254       | -9.5                     | -9.7 | 542 | UMHMNP481174       | -8.8                     | -9.6 | 594 | UMHMNP55688443     | -9.0                     | -9.5 |
| 491 | UMHMNP62541097     | -8.1                     | -9.7 | 543 | UMHMNP76376324     | -9.6                     | -9.6 | 595 | UMHMNP64907240     | -8.2                     | -9.5 |
| 492 | UMHMNP705279716    | -9.5                     | -9.7 | 544 | UMHMNP145398603    | -8.9                     | -9.6 | 596 | UMHMNP115982326    | -8.8                     | -9.5 |
| 493 | UMHMNP83198270     | -9.6                     | -9.7 | 545 | UMHMNP178200936    | -8.6                     | -9.6 | 597 | UMHMNP126622615    | -8.7                     | -9.5 |
| 494 | UMHMNP83681816     | -9.6                     | -9.7 | 546 | UMHMNP193074496    | -8.1                     | -9.6 | 598 | UMHMNP157521090    | -8.6                     | -9.5 |
| 495 | UMHMNP94806027     | -8.8                     | -9.7 | 547 | UMHMNP202855036    | -8.4                     | -9.6 | 599 | UMHMNP171784104    | -8.5                     | -9.5 |
| 496 | UMHMNP138530731    | -9.8                     | -9.6 | 548 | UMHMNP244303773    | -9.4                     | -9.6 | 600 | UMHMNP191112193    | -9.6                     | -9.5 |
| 497 | UMHMNP191212369    | -8.6                     | -9.6 | 549 | UMHMNP33168773     | -8.5                     | -9.6 | 601 | UMHMNP21317817     | -8.5                     | -9.5 |
| 498 | UMHMNP197381570    | -9.6                     | -9.6 | 550 | UMHMNP521040       | -8.3                     | -9.6 | 602 | UMHMNP246036862    | -8.9                     | -9.5 |
| 499 | UMHMNP221300001    | -8.1                     | -9.6 | 551 | UMHMNP87168330     | -9.1                     | -9.6 | 603 | UMHMNP393828336    | -8.7                     | -9.5 |
| 500 | UMHMNP244066055    | -9.5                     | -9.6 | 552 | UMHMNP97614625     | -9.6                     | -9.6 | 604 | UMHMNP474635       | -8.9                     | -9.5 |
| 501 | UMHMNP473739401    | -9.5                     | -9.6 | 553 | UMHMNP133530253    | -9.4                     | -9.6 | 605 | UMHMNP61586003     | -8.8                     | -9.5 |
| 502 | UMHMNP508193315    | -9.4                     | -9.6 | 554 | UMHMNP153444872    | -9.1                     | -9.6 | 606 | UMHMNP70165456     | -9.5                     | -9.5 |
| 503 | UMHMNP61897903     | -9.2                     | -9.6 | 555 | UMHMNP169387740    | -9.6                     | -9.6 | 607 | UMHMNP76836174     | -10.1                    | -9.5 |
| 504 | UMHMNP62008042     | -8.2                     | -9.6 | 556 | UMHMNP193008274    | -9.4                     | -9.6 | 608 | UMHMNP862200495    | -9.2                     | -9.5 |
| 505 | UMHMNP77715867     | -9.3                     | -9.6 | 557 | UMHMNP199012867    | -8.1                     | -9.6 | 609 | UMHMNP87532283     | -9.5                     | -9.5 |
| 506 | UMHMNP122540276    | -8.1                     | -9.6 | 558 | UMHMNP287964867    | -8.9                     | -9.6 | 610 | UMHMNP116407217    | -8.4                     | -9.5 |
| 507 | UMHMNP151890845    | -8.2                     | -9.6 | 559 | UMHMNP80677765     | -9.1                     | -9.6 | 611 | UMHMNP14729294     | -9.5                     | -9.5 |
| 508 | UMHMNP158758419    | -9.0                     | -9.6 | 560 | UMHMNP107168581    | -8.9                     | -9.6 | 612 | UMHMNP156953898    | -8.8                     | -9.5 |
| 509 | UMHMNP33646785     | -9.0                     | -9.6 | 561 | UMHMNP154563798    | -8.1                     | -9.6 | 613 | UMHMNP160014879    | -9.0                     | -9.5 |
| 510 | UMHMNP50868503     | -8.4                     | -9.6 | 562 | UMHMNP169565779    | -9.2                     | -9.6 | 614 | UMHMNP175170895    | -9.5                     | -9.5 |
| 511 | UMHMNP58497293     | -9.0                     | -9.6 | 563 | UMHMNP17752168     | -8.4                     | -9.6 | 615 | UMHMNP211555021    | -8.0                     | -9.5 |
| 512 | UMHMNP745075245    | -9.5                     | -9.6 | 564 | UMHMNP19383870     | -8.8                     | -9.6 | 616 | UMHMNP94444254     | -9.4                     | -9.5 |
| 513 | UMHMNP866403738    | -9.6                     | -9.6 | 565 | UMHMNP242467534    | -9.6                     | -9.6 | 617 | UMHMNP119108360    | -9.9                     | -9.5 |
| 514 | UMHMNP94806050     | -8.8                     | -9.6 | 566 | UMHMNP710324962    | -9.4                     | -9.6 | 618 | UMHMNP145398647    | -9.0                     | -9.5 |
| 515 | UMHMNP96313950     | -9.2                     | -9.6 | 567 | UMHMNP77794811     | -8.3                     | -9.6 | 619 | UMHMNP157207880    | -8.1                     | -9.5 |
| 516 | UMHMNP119760848    | -8.4                     | -9.6 | 568 | UMHMNP84873143     | -8.9                     | -9.6 | 620 | UMHMNP178115907    | -9.5                     | -9.5 |
| 517 | UMHMNP121819690    | -8.3                     | -9.6 | 569 | UMHMNP121295098    | -9.7                     | -9.6 | 621 | UMHMNP22350498     | -9.3                     | -9.5 |
| 518 | UMHMNP132911456    | -8.3                     | -9.6 | 570 | UMHMNP143545908    | -9.2                     | -9.6 | 622 | UMHMNP224576050    | -9.4                     | -9.5 |
| 519 | UMHMNP160014880    | -9.3                     | -9.6 | 571 | UMHMNP184885072    | -10.9                    | -9.6 | 623 | UMHMNP246037605    | -9.5                     | -9.5 |

Table S1. Continued.

| No. | Compound Name/Code | Docking Score (kcal/mol) |      | No. | Compound Name/Code | Docking Score (kcal/mol) |      | No. | Compound Name/Code | Docking Score (kcal/mol) |      |
|-----|--------------------|--------------------------|------|-----|--------------------|--------------------------|------|-----|--------------------|--------------------------|------|
|     |                    | Fast                     | Mod. |     |                    | Fast                     | Mod. |     |                    | Fast                     | Mod. |
| 624 | UMHMNP452082596    | -9.2                     | -9.5 | 676 | UMHMNP82507253     | -9.4                     | -9.5 | 728 | UMHMNP17696694     | -9.2                     | -9.4 |
| 625 | UMHMNP53282681     | -9.7                     | -9.5 | 677 | UMHMNP83511846     | -9.0                     | -9.5 | 729 | UMHMNP195259826    | -8.3                     | -9.4 |
| 626 | UMHMNP82507264     | -8.5                     | -9.5 | 678 | UMHMNP114820267    | -8.7                     | -9.5 | 730 | UMHMNP209167259    | -8.9                     | -9.4 |
| 627 | UMHMNP97888147     | -8.8                     | -9.5 | 679 | UMHMNP134128157    | -10.0                    | -9.5 | 731 | UMHMNP214483235    | -10.0                    | -9.4 |
| 628 | UMHMNP109152332    | -9.3                     | -9.5 | 680 | UMHMNP20465901     | -8.3                     | -9.5 | 732 | UMHMNP570898       | -8.6                     | -9.4 |
| 629 | UMHMNP15146619     | -8.9                     | -9.5 | 681 | UMHMNP23869161     | -8.6                     | -9.5 | 733 | UMHMNP94806038     | -9.2                     | -9.4 |
| 630 | UMHMNP639512199    | -8.8                     | -9.5 | 682 | UMHMNP243668124    | -9.0                     | -9.5 | 734 | UMHMNP103005205    | -9.2                     | -9.4 |
| 631 | UMHMNP66082288     | -9.5                     | -9.5 | 683 | UMHMNP26808275     | -8.8                     | -9.5 | 735 | UMHMNP141266060    | -8.4                     | -9.4 |
| 632 | UMHMNP79703256     | -8.5                     | -9.5 | 684 | UMHMNP58701705     | -8.2                     | -9.5 | 736 | UMHMNP145176858    | -9.1                     | -9.4 |
| 633 | UMHMNP864514590    | -9.5                     | -9.5 | 685 | UMHMNP61737971     | -9.3                     | -9.5 | 737 | UMHMNP193008263    | -8.9                     | -9.4 |
| 634 | UMHMNP108675634    | -8.0                     | -9.5 | 686 | UMHMNP76343947     | -9.4                     | -9.5 | 738 | UMHMNP39832310     | -9.0                     | -9.4 |
| 635 | UMHMNP125282135    | -9.8                     | -9.5 | 687 | UMHMNP80525491     | -9.4                     | -9.5 | 739 | UMHMNP63109171     | -9.3                     | -9.4 |
| 636 | UMHMNP129829909    | -8.2                     | -9.5 | 688 | UMHMNP81387840     | -9.4                     | -9.5 | 740 | UMHMNP81262966     | -9.9                     | -9.4 |
| 637 | UMHMNP160632280    | -8.2                     | -9.5 | 689 | UMHMNP85748136     | -9.2                     | -9.5 | 741 | UMHMNP861676575    | -9.4                     | -9.4 |
| 638 | UMHMNP183593706    | -8.8                     | -9.5 | 690 | UMHMNP149064346    | -9.5                     | -9.4 | 742 | UMHMNP87697992     | -8.9                     | -9.4 |
| 639 | UMHMNP226716945    | -8.4                     | -9.5 | 691 | UMHMNP150417677    | -8.3                     | -9.4 | 743 | UMHMNP110189065    | -8.2                     | -9.4 |
| 640 | UMHMNP272458318    | -8.6                     | -9.5 | 692 | UMHMNP172173987    | -8.4                     | -9.4 | 744 | UMHMNP114820256    | -9.5                     | -9.4 |
| 641 | UMHMNP298196744    | -9.8                     | -9.5 | 693 | UMHMNP180603672    | -9.3                     | -9.4 | 745 | UMHMNP114836872    | -8.6                     | -9.4 |
| 642 | UMHMNP321847103    | -8.2                     | -9.5 | 694 | UMHMNP196500773    | -9.4                     | -9.4 | 746 | UMHMNP132922873    | -9.3                     | -9.4 |
| 643 | UMHMNP80358005     | -9.2                     | -9.5 | 695 | UMHMNP264254866    | -9.5                     | -9.4 | 747 | UMHMNP133562524    | -8.4                     | -9.4 |
| 644 | UMHMNP81306583     | -8.5                     | -9.5 | 696 | UMHMNP41083970     | -8.3                     | -9.4 | 748 | UMHMNP157758742    | -10.4                    | -9.4 |
| 645 | UMHMNP185331957    | -8.7                     | -9.5 | 697 | UMHMNP76758184     | -8.6                     | -9.4 | 749 | UMHMNP175861800    | -9.3                     | -9.4 |
| 646 | UMHMNP313042       | -8.7                     | -9.5 | 698 | UMHMNP771534384    | -9.4                     | -9.4 | 750 | UMHMNP189457269    | -8.9                     | -9.4 |
| 647 | UMHMNP37299084     | -8.3                     | -9.5 | 699 | UMHMNP78418458     | -9.0                     | -9.4 | 751 | UMHMNP34427639     | -8.6                     | -9.4 |
| 648 | UMHMNP516370       | -9.1                     | -9.5 | 700 | UMHMNP105418777    | -9.4                     | -9.4 | 752 | UMHMNP74799556     | -9.4                     | -9.4 |
| 649 | UMHMNP52645097     | -8.1                     | -9.5 | 701 | UMHMNP134887255    | -8.1                     | -9.4 | 753 | UMHMNP76898481     | -9.2                     | -9.4 |
| 650 | UMHMNP57830        | -10.0                    | -9.5 | 702 | UMHMNP168482346    | -8.4                     | -9.4 | 754 | UMHMNP80981664     | -9.2                     | -9.4 |
| 651 | UMHMNP59176624     | -8.8                     | -9.5 | 703 | UMHMNP215245264    | -9.0                     | -9.4 | 755 | UMHMNP82637056     | -9.3                     | -9.4 |
| 652 | UMHMNP745075267    | -9.4                     | -9.5 | 704 | UMHMNP337379198    | -9.0                     | -9.4 | 756 | UMHMNP84582627     | -9.5                     | -9.4 |
| 653 | UMHMNP89411314     | -9.5                     | -9.5 | 705 | UMHMNP55688501     | -8.8                     | -9.4 | 757 | UMHMNP88191064     | -9.4                     | -9.4 |
| 654 | UMHMNP144398550    | -9.5                     | -9.5 | 706 | UMHMNP651489       | -9.4                     | -9.4 | 758 | UMHMNP103190143    | -9.7                     | -9.4 |
| 655 | UMHMNP181306741    | -8.5                     | -9.5 | 707 | UMHMNP681240631    | -9.1                     | -9.4 | 759 | UMHMNP114820303    | -8.9                     | -9.4 |
| 656 | UMHMNP2061645      | -8.4                     | -9.5 | 708 | UMHMNP81275823     | -9.4                     | -9.4 | 760 | UMHMNP134985072    | -9.4                     | -9.4 |
| 657 | UMHMNP221169751    | -10.0                    | -9.5 | 709 | UMHMNP124596607    | -9.0                     | -9.4 | 761 | UMHMNP140429374    | -9.7                     | -9.4 |
| 658 | UMHMNP287964856    | -9.6                     | -9.5 | 710 | UMHMNP145038579    | -9.4                     | -9.4 | 762 | UMHMNP144436077    | -10.0                    | -9.4 |
| 659 | UMHMNP517900582    | -9.1                     | -9.5 | 711 | UMHMNP174286227    | -8.5                     | -9.4 | 763 | UMHMNP194148975    | -9.6                     | -9.4 |
| 660 | UMHMNP5813650      | -8.4                     | -9.5 | 712 | UMHMNP179936528    | -8.2                     | -9.4 | 764 | UMHMNP53755092     | -9.2                     | -9.4 |
| 661 | UMHMNP65717886     | -8.1                     | -9.5 | 713 | UMHMNP264624444    | -8.4                     | -9.4 | 765 | UMHMNP77643244     | -8.6                     | -9.4 |
| 662 | UMHMNP75266250     | -9.5                     | -9.5 | 714 | UMHMNP51630581     | -9.0                     | -9.4 | 766 | UMHMNP78342377     | -8.1                     | -9.4 |
| 663 | UMHMNP86690144     | -9.5                     | -9.5 | 715 | UMHMNP61973408     | -9.5                     | -9.4 | 767 | UMHMNP83487        | -8.8                     | -9.4 |
| 664 | UMHMNP86748303     | -9.2                     | -9.5 | 716 | UMHMNP63635438     | -9.6                     | -9.4 | 768 | UMHMNP132214245    | -8.3                     | -9.4 |
| 665 | UMHMNP102054488    | -8.9                     | -9.5 | 717 | UMHMNP674819466    | -9.4                     | -9.4 | 769 | UMHMNP151484707    | -10.9                    | -9.4 |
| 666 | UMHMNP119539752    | -9.6                     | -9.5 | 718 | UMHMNP78342402     | -8.4                     | -9.4 | 770 | UMHMNP155645515    | -8.4                     | -9.4 |
| 667 | UMHMNP133883177    | -9.2                     | -9.5 | 719 | UMHMNP798557989    | -9.0                     | -9.4 | 771 | UMHMNP169564969    | -9.0                     | -9.4 |
| 668 | UMHMNP135340011    | -9.5                     | -9.5 | 720 | UMHMNP80525479     | -9.2                     | -9.4 | 772 | UMHMNP171440247    | -8.4                     | -9.4 |
| 669 | UMHMNP143458757    | -8.9                     | -9.5 | 721 | UMHMNP81120743     | -9.3                     | -9.4 | 773 | UMHMNP180633550    | -8.1                     | -9.4 |
| 670 | UMHMNP144587553    | -8.7                     | -9.5 | 722 | UMHMNP114820289    | -10.3                    | -9.4 | 774 | UMHMNP181034935    | -8.4                     | -9.4 |
| 671 | UMHMNP158402610    | -8.4                     | -9.5 | 723 | UMHMNP121449943    | -8.9                     | -9.4 | 775 | UMHMNP107900754    | -9.4                     | -9.4 |
| 672 | UMHMNP165815827    | -8.6                     | -9.5 | 724 | UMHMNP143049154    | -9.6                     | -9.4 | 776 | UMHMNP126596029    | -8.2                     | -9.4 |
| 673 | UMHMNP681240620    | -9.0                     | -9.5 | 725 | UMHMNP14958668     | -9.2                     | -9.4 | 777 | UMHMNP16826418     | -8.3                     | -9.4 |
| 674 | UMHMNP72542495     | -8.4                     | -9.5 | 726 | UMHMNP152247944    | -9.7                     | -9.4 | 778 | UMHMNP171114071    | -8.8                     | -9.4 |
| 675 | UMHMNP75886123     | -9.1                     | -9.5 | 727 | UMHMNP173220978    | -8.6                     | -9.4 | 779 | UMHMNP70214925     | -9.4                     | -9.4 |

Table S1. Continued.

| No. | Compound Name/Code | Docking Score (kcal/mol) |      | No. | Compound Name/Code | Docking Score (kcal/mol) |      | No. | Compound Name/Code | Docking Score (kcal/mol) |      |
|-----|--------------------|--------------------------|------|-----|--------------------|--------------------------|------|-----|--------------------|--------------------------|------|
|     |                    | Fast                     | Mod. |     |                    | Fast                     | Mod. |     |                    | Fast                     | Mod. |
| 780 | UMHMNP71678030     | -9.3                     | -9.4 | 835 | UMHMNP152845755    | -10.3                    | -9.3 | 890 | UMHMNP86105659     | -8.9                     | -9.3 |
| 781 | UMHMNP745075278    | -9.4                     | -9.4 | 836 | UMHMNP153415351    | -8.7                     | -9.3 | 891 | UMHMNP97719783     | -9.1                     | -9.3 |
| 782 | UMHMNP78355289     | -8.9                     | -9.4 | 837 | UMHMNP158149543    | -8.6                     | -9.3 | 892 | UMHMNP112515432    | -9.1                     | -9.3 |
| 783 | UMHMNP1174921      | -8.3                     | -9.4 | 838 | UMHMNP199600378    | -8.4                     | -9.3 | 893 | UMHMNP119212281    | -8.2                     | -9.3 |
| 784 | UMHMNP13963138     | -9.3                     | -9.4 | 839 | UMHMNP223596723    | -9.3                     | -9.3 | 894 | UMHMNP137350948    | -8.6                     | -9.3 |
| 785 | UMHMNP173681533    | -8.9                     | -9.4 | 840 | UMHMNP614748628    | -8.3                     | -9.3 | 895 | UMHMNP175992980    | -9.2                     | -9.3 |
| 786 | UMHMNP433717534    | -8.7                     | -9.4 | 841 | UMHMNP75373625     | -9.1                     | -9.3 | 896 | UMHMNP191789783    | -8.3                     | -9.3 |
| 787 | UMHMNP65773980     | -9.3                     | -9.4 | 842 | UMHMNP83728818     | -8.8                     | -9.3 | 897 | UMHMNP306967759    | -9.2                     | -9.3 |
| 788 | UMHMNP67314152     | -8.9                     | -9.4 | 843 | UMHMNP85198216     | -9.1                     | -9.3 | 898 | UMHMNP306997422    | -8.8                     | -9.3 |
| 789 | UMHMNP70022718     | -10.0                    | -9.4 | 844 | UMHMNP86748278     | -9.1                     | -9.3 | 899 | UMHMNP31893353     | -9.4                     | -9.3 |
| 790 | UMHMNP77983267     | -8.8                     | -9.4 | 845 | UMHMNP93426927     | -9.1                     | -9.3 | 900 | UMHMNP54448725     | -8.9                     | -9.3 |
| 791 | UMHMNP78285855     | -8.6                     | -9.4 | 846 | UMHMNP136685295    | -9.6                     | -9.3 | 901 | UMHMNP54602141     | -8.2                     | -9.3 |
| 792 | UMHMNP882693461    | -8.1                     | -9.4 | 847 | UMHMNP143016868    | -8.3                     | -9.3 | 902 | UMHMNP71932064     | -9.2                     | -9.3 |
| 793 | UMHMNP109152343    | -8.5                     | -9.3 | 848 | UMHMNP146506414    | -8.3                     | -9.3 | 903 | UMHMNP78518748     | -9.2                     | -9.3 |
| 794 | UMHMNP196500808    | -8.7                     | -9.3 | 849 | UMHMNP37976899     | -8.2                     | -9.3 | 904 | UMHMNP81853830     | -8.8                     | -9.3 |
| 795 | UMHMNP199600345    | -9.1                     | -9.3 | 850 | UMHMNP99165169     | -8.3                     | -9.3 | 905 | UMHMNP116747401    | -9.8                     | -9.3 |
| 796 | UMHMNP286433805    | -8.7                     | -9.3 | 851 | UMHMNP155850887    | -8.5                     | -9.3 | 906 | UMHMNP156352657    | -8.3                     | -9.3 |
| 797 | UMHMNP81657796     | -8.7                     | -9.3 | 852 | UMHMNP158734248    | -9.1                     | -9.3 | 907 | UMHMNP164081009    | -8.6                     | -9.3 |
| 798 | UMHMNP862288902    | -9.3                     | -9.3 | 853 | UMHMNP169387773    | -9.3                     | -9.3 | 908 | UMHMNP189818493    | -8.1                     | -9.3 |
| 799 | UMHMNP100667752    | -9.4                     | -9.3 | 854 | UMHMNP179733143    | -9.3                     | -9.3 | 909 | UMHMNP283605458    | -9.4                     | -9.3 |
| 800 | UMHMNP121819714    | -8.4                     | -9.3 | 855 | UMHMNP260436291    | -10.4                    | -9.3 | 910 | UMHMNP32450263     | -9.3                     | -9.3 |
| 801 | UMHMNP121825443    | -8.1                     | -9.3 | 856 | UMHMNP263764018    | -8.3                     | -9.3 | 911 | UMHMNP471534       | -8.5                     | -9.3 |
| 802 | UMHMNP143682171    | -9.3                     | -9.3 | 857 | UMHMNP37772035     | -9.3                     | -9.3 | 912 | UMHMNP60048900     | -8.2                     | -9.3 |
| 803 | UMHMNP221160845    | -9.6                     | -9.3 | 858 | UMHMNP41083903     | -9.2                     | -9.3 | 913 | UMHMNP601570       | -8.1                     | -9.3 |
| 804 | UMHMNP250147194    | -9.2                     | -9.3 | 859 | UMHMNP452082609    | -9.0                     | -9.3 | 914 | UMHMNP71885206     | -8.2                     | -9.3 |
| 805 | UMHMNP38636496     | -8.6                     | -9.3 | 860 | UMHMNP57885        | -10.1                    | -9.3 | 915 | UMHMNP93426916     | -9.5                     | -9.3 |
| 806 | UMHMNP448264651    | -8.6                     | -9.3 | 861 | UMHMNP69672680     | -9.3                     | -9.3 | 917 | UMHMNP112515443    | -8.8                     | -9.3 |
| 807 | UMHMNP636599901    | -9.3                     | -9.3 | 862 | UMHMNP749867230    | -9.2                     | -9.3 | 918 | UMHMNP129620253    | -8.6                     | -9.3 |
| 808 | UMHMNP675106204    | -8.5                     | -9.3 | 863 | UMHMNP85748147     | -9.6                     | -9.3 | 919 | UMHMNP132410356    | -8.7                     | -9.3 |
| 809 | UMHMNP75479117     | -8.8                     | -9.3 | 864 | UMHMNP90352208     | -8.9                     | -9.3 | 920 | UMHMNP133883213    | -8.3                     | -9.3 |
| 810 | UMHMNP81657398     | -9.2                     | -9.3 | 865 | UMHMNP112781234    | -8.8                     | -9.3 | 921 | UMHMNP141859974    | -9.8                     | -9.3 |
| 811 | UMHMNP148270160    | -8.1                     | -9.3 | 866 | UMHMNP112923407    | -9.3                     | -9.3 | 922 | UMHMNP1452295      | -8.1                     | -9.3 |
| 812 | UMHMNP155944266    | -8.1                     | -9.3 | 867 | UMHMNP124596629    | -8.1                     | -9.3 | 923 | UMHMNP211358713    | -9.1                     | -9.3 |
| 813 | UMHMNP174796782    | -9.4                     | -9.3 | 868 | UMHMNP132214234    | -8.9                     | -9.3 | 924 | UMHMNP39832309     | -8.6                     | -9.3 |
| 814 | UMHMNP183381068    | -8.7                     | -9.3 | 869 | UMHMNP132750482    | -8.3                     | -9.3 | 925 | UMHMNP40772121     | -8.7                     | -9.3 |
| 815 | UMHMNP188968447    | -10.0                    | -9.3 | 870 | UMHMNP160014868    | -8.2                     | -9.3 | 926 | UMHMNP495380477    | -8.5                     | -9.3 |
| 816 | UMHMNP395070889    | -8.3                     | -9.3 | 871 | UMHMNP179730360    | -9.1                     | -9.3 | 927 | UMHMNP73538575     | -8.2                     | -9.3 |
| 817 | UMHMNP74055428     | -8.3                     | -9.3 | 872 | UMHMNP247145397    | -8.1                     | -9.3 | 928 | UMHMNP749216464    | -8.5                     | -9.3 |
| 818 | UMHMNP85505664     | -9.2                     | -9.3 | 873 | UMHMNP26531715     | -8.1                     | -9.3 | 929 | UMHMNP874221893    | -8.4                     | -9.3 |
| 819 | UMHMNP86105682     | -9.2                     | -9.3 | 864 | UMHMNP90352208     | -8.9                     | -9.3 | 930 | UMHMNP145038580    | -9.0                     | -9.3 |
| 820 | UMHMNP94354980     | -9.3                     | -9.3 | 865 | UMHMNP112781234    | -8.8                     | -9.3 | 931 | UMHMNP16408102     | -9.1                     | -9.3 |
| 821 | UMHMNP107551746    | -9.3                     | -9.3 | 866 | UMHMNP112923407    | -9.3                     | -9.3 | 932 | UMHMNP166038284    | -8.4                     | -9.3 |
| 822 | UMHMNP109979171    | -9.3                     | -9.3 | 867 | UMHMNP124596629    | -8.1                     | -9.3 | 933 | UMHMNP186803327    | -8.2                     | -9.3 |
| 823 | UMHMNP147391819    | -9.2                     | -9.3 | 868 | UMHMNP132214234    | -8.9                     | -9.3 | 934 | UMHMNP20817929     | -8.7                     | -9.3 |
| 824 | UMHMNP156472898    | -8.8                     | -9.3 | 869 | UMHMNP132750482    | -8.3                     | -9.3 | 935 | UMHMNP263764041    | -9.6                     | -9.3 |
| 825 | UMHMNP161776756    | -8.7                     | -9.3 | 870 | UMHMNP160014868    | -8.2                     | -9.3 | 936 | UMHMNP474577       | -8.2                     | -9.3 |
| 826 | UMHMNP17991672     | -9.3                     | -9.3 | 871 | UMHMNP179730360    | -9.1                     | -9.3 | 937 | UMHMNP566916       | -9.1                     | -9.3 |
| 827 | UMHMNP2465114      | -9.2                     | -9.3 | 872 | UMHMNP247145397    | -8.1                     | -9.3 | 938 | UMHMNP64180718     | -8.1                     | -9.3 |
| 828 | UMHMNP735278270    | -9.1                     | -9.3 | 873 | UMHMNP26531715     | -8.1                     | -9.3 | 939 | UMHMNP68520263     | -8.2                     | -9.3 |
| 829 | UMHMNP782491785    | -9.1                     | -9.3 | 884 | UMHMNP268735575    | -9.9                     | -9.3 | 940 | UMHMNP72534135     | -9.6                     | -9.3 |
| 830 | UMHMNP106534434    | -9.0                     | -9.3 | 885 | UMHMNP306967760    | -8.5                     | -9.3 | 941 | UMHMNP91297073     | -8.8                     | -9.3 |
| 831 | UMHMNP117417717    | -9.5                     | -9.3 | 886 | UMHMNP67463790     | -8.6                     | -9.3 | 942 | UMHMNP95062296     | -8.4                     | -9.3 |
| 832 | UMHMNP1242019      | -8.1                     | -9.3 | 887 | UMHMNP69511202     | -9.0                     | -9.3 | 943 | UMHMNP100994556    | -9.0                     | -9.3 |
| 833 | UMHMNP14231335     | -9.0                     | -9.3 | 888 | UMHMNP81575066     | -8.4                     | -9.3 | 944 | UMHMNP124843681    | -8.2                     | -9.3 |
| 834 | UMHMNP144436066    | -8.8                     | -9.3 | 889 | UMHMNP858950386    | -9.2                     | -9.3 | 945 | UMHMNP130246989    | -8.2                     | -9.3 |

Table S1. Continued.

| No.  | Compound Name/Code | Docking Score (kcal/mol) |      | No.  | Compound Name/Code | Docking Score (kcal/mol) |      | No.  | Compound Name/Code | Docking Score (kcal/mol) |      |
|------|--------------------|--------------------------|------|------|--------------------|--------------------------|------|------|--------------------|--------------------------|------|
|      |                    | Fast                     | Mod. |      |                    | Fast                     | Mod. |      |                    | Fast                     | Mod. |
| 946  | UMHMNP134458007    | -9.0                     | -9.3 | 1001 | UMHMNP333970131    | -8.5                     | -9.3 | 1056 | UMHMNP116972920    | -9.5                     | -9.3 |
| 947  | UMHMNP137570435    | -8.5                     | -9.3 | 1002 | UMHMNP452929645    | -9.8                     | -9.3 | 1057 | UMHMNP128802175    | -8.7                     | -9.3 |
| 948  | UMHMNP140866202    | -8.7                     | -9.3 | 1003 | UMHMNP461441429    | -9.2                     | -9.3 | 1058 | UMHMNP142780367    | -9.6                     | -9.3 |
| 949  | UMHMNP145212391    | -10.7                    | -9.3 | 1004 | UMHMNP478364226    | -10.1                    | -9.3 | 1059 | UMHMNP517900559    | -9.8                     | -9.3 |
| 950  | UMHMNP162290417    | -8.5                     | -9.3 | 1005 | UMHMNP50335041     | -9.1                     | -9.3 | 1060 | UMHMNP52043013     | -8.1                     | -9.3 |
| 951  | UMHMNP175669100    | -8.6                     | -9.3 | 1006 | UMHMNP771534373    | -8.6                     | -9.3 | 1061 | UMHMNP6035627      | -8.2                     | -9.3 |
| 952  | UMHMNP216770295    | -10.0                    | -9.3 | 1007 | UMHMNP99617397     | -8.8                     | -9.3 | 1062 | UMHMNP67230062     | -9.2                     | -9.3 |
| 953  | UMHMNP62996741     | -8.7                     | -9.3 | 1008 | UMHMNP116302353    | -8.2                     | -9.3 | 1063 | UMHMNP10525221     | -9.7                     | -9.3 |
| 954  | UMHMNP75246763     | -8.2                     | -9.3 | 1009 | UMHMNP121727273    | -8.6                     | -9.3 | 1064 | UMHMNP1159279      | -8.6                     | -9.3 |
| 955  | UMHMNP85733773     | -8.5                     | -9.3 | 1010 | UMHMNP142677121    | -8.5                     | -9.3 | 1065 | UMHMNP143007287    | -8.9                     | -9.3 |
| 956  | UMHMNP93474136     | -8.5                     | -9.3 | 1011 | UMHMNP174063811    | -8.4                     | -9.3 | 1066 | UMHMNP152833608    | -8.8                     | -9.3 |
| 957  | UMHMNP984849       | -8.8                     | -9.3 | 1012 | UMHMNP24662951     | -8.1                     | -9.3 | 1067 | UMHMNP161776734    | -8.9                     | -9.3 |
| 958  | UMHMNP106199819    | -10.0                    | -9.3 | 1013 | UMHMNP64687850     | -9.0                     | -9.3 | 1068 | UMHMNP178179992    | -8.1                     | -9.3 |
| 959  | UMHMNP112693240    | -8.1                     | -9.3 | 1014 | UMHMNP71031588     | -9.1                     | -9.3 | 1069 | UMHMNP17974786     | -8.5                     | -9.3 |
| 960  | UMHMNP116169290    | -8.2                     | -9.3 | 1015 | UMHMNP73723383     | -9.1                     | -9.3 | 1070 | UMHMNP225662099    | -10.0                    | -9.3 |
| 961  | UMHMNP133883202    | -9.9                     | -9.3 | 1016 | UMHMNP81474615     | -9.3                     | -9.3 | 1071 | UMHMNP326794176    | -8.8                     | -9.3 |
| 962  | UMHMNP144335148    | -8.3                     | -9.3 | 1017 | UMHMNP85337151     | -10.0                    | -9.3 | 1072 | UMHMNP55081395     | -10.5                    | -9.3 |
| 963  | UMHMNP148010406    | -8.1                     | -9.3 | 1018 | UMHMNP862200473    | -10.8                    | -9.3 | 1073 | UMHMNP58560375     | -8.2                     | -9.3 |
| 964  | UMHMNP1491776      | -8.2                     | -9.3 | 1019 | UMHMNP128855072    | -8.8                     | -9.3 | 1074 | UMHMNP62861158     | -9.5                     | -9.3 |
| 965  | UMHMNP157403333    | -8.4                     | -9.3 | 1020 | UMHMNP14599485     | -8.7                     | -9.3 | 1075 | UMHMNP68690926     | -10.7                    | -9.3 |
| 966  | UMHMNP189514485    | -8.1                     | -9.3 | 1021 | UMHMNP16250616     | -8.6                     | -9.3 | 1076 | UMHMNP69297490     | -9.1                     | -9.3 |
| 967  | UMHMNP24041665     | -9.2                     | -9.3 | 1022 | UMHMNP175413215    | -8.2                     | -9.3 | 1077 | UMHMNP79580282     | -9.3                     | -9.3 |
| 968  | UMHMNP487016966    | -8.9                     | -9.3 | 1023 | UMHMNP224577382    | -9.8                     | -9.3 | 1078 | UMHMNP98495364     | -9.3                     | -9.3 |
| 969  | UMHMNP50611864     | -8.7                     | -9.3 | 1024 | UMHMNP3404226      | -9.2                     | -9.3 | 1079 | UMHMNP99499817     | -9.3                     | -9.3 |
| 970  | UMHMNP57103216     | -9.0                     | -9.3 | 1025 | UMHMNP52936693     | -8.4                     | -9.3 | 1080 | UMHMNP135729452    | -8.5                     | -9.3 |
| 971  | UMHMNP690253771    | -8.1                     | -9.3 | 1026 | UMHMNP73700295     | -8.2                     | -9.3 | 1081 | UMHMNP139765290    | -8.9                     | -9.3 |
| 972  | UMHMNP871483351    | -8.1                     | -9.3 | 1027 | UMHMNP81387851     | -9.9                     | -9.3 | 1082 | UMHMNP143049132    | -10.5                    | -9.3 |
| 973  | UMHMNP104720152    | -8.7                     | -9.3 | 1028 | UMHMNP850145129    | -8.4                     | -9.3 | 1083 | UMHMNP143049143    | -8.4                     | -9.3 |
| 974  | UMHMNP14956242     | -9.4                     | -9.3 | 1029 | UMHMNP87307286     | -9.1                     | -9.3 | 1084 | UMHMNP156310188    | -8.3                     | -9.3 |
| 975  | UMHMNP214483199    | -8.2                     | -9.3 | 1030 | UMHMNP96253600     | -8.8                     | -9.3 | 1085 | UMHMNP175702360    | -9.0                     | -9.3 |
| 976  | UMHMNP517900515    | -9.7                     | -9.3 | 1031 | UMHMNP102054524    | -9.3                     | -9.3 | 1086 | UMHMNP178494821    | -9.3                     | -9.3 |
| 977  | UMHMNP549520743    | -8.3                     | -9.3 | 1032 | UMHMNP117675135    | -8.7                     | -9.3 | 1087 | UMHMNP184430011    | -9.2                     | -9.3 |
| 978  | UMHMNP87859981     | -9.2                     | -9.3 | 1033 | UMHMNP141321133    | -8.7                     | -9.3 | 1088 | UMHMNP38819442     | -8.3                     | -9.3 |
| 979  | UMHMNP139765303    | -8.3                     | -9.3 | 1034 | UMHMNP141859985    | -9.5                     | -9.3 | 1089 | UMHMNP54622514     | -8.5                     | -9.3 |
| 980  | UMHMNP149260731    | -10.2                    | -9.3 | 1035 | UMHMNP145349946    | -9.0                     | -9.3 | 1090 | UMHMNP99617433     | -9.3                     | -9.3 |
| 981  | UMHMNP149260753    | -9.4                     | -9.3 | 1036 | UMHMNP158786755    | -9.3                     | -9.3 | 1091 | UMHMNP117021064    | -9.4                     | -9.3 |
| 982  | UMHMNP22850119     | -8.5                     | -9.3 | 1037 | UMHMNP178064410    | -9.3                     | -9.3 | 1092 | UMHMNP124727077    | -8.3                     | -9.3 |
| 983  | UMHMNP237755167    | -9.4                     | -9.3 | 1038 | UMHMNP517900504    | -9.2                     | -9.3 | 1093 | UMHMNP132194322    | -9.1                     | -9.1 |
| 984  | UMHMNP264618215    | -8.3                     | -9.3 | 1039 | UMHMNP518069       | -8.3                     | -9.3 | 1094 | UMHMNP141854695    | -8.2                     | -9.1 |
| 985  | UMHMNP38788817     | -9.2                     | -9.3 | 1040 | UMHMNP681226415    | -9.7                     | -9.3 | 1095 | UMHMNP158734271    | -8.3                     | -9.1 |
| 986  | UMHMNP425368598    | -9.0                     | -9.3 | 1041 | UMHMNP745075256    | -8.5                     | -9.3 | 1096 | UMHMNP171784013    | -8.6                     | -9.1 |
| 987  | UMHMNP446862697    | -8.6                     | -9.3 | 1042 | UMHMNP80525480     | -8.3                     | -9.3 | 1097 | UMHMNP215245286    | -9.6                     | -9.1 |
| 988  | UMHMNP454476892    | -8.7                     | -9.3 | 1043 | UMHMNP126394749    | -10.4                    | -9.3 | 1098 | UMHMNP473256223    | -8.8                     | -9.1 |
| 989  | UMHMNP489446573    | -9.1                     | -9.3 | 1044 | UMHMNP133883199    | -9.5                     | -9.3 | 1099 | UMHMNP479067624    | -9.4                     | -9.1 |
| 990  | UMHMNP781646819    | -8.4                     | -9.3 | 1045 | UMHMNP143049121    | -8.2                     | -9.3 | 1100 | UMHMNP64997520     | -8.9                     | -9.1 |
| 991  | UMHMNP863684417    | -9.8                     | -9.3 | 1046 | UMHMNP147362398    | -8.6                     | -9.3 | 1101 | UMHMNP70329258     | -8.1                     | -9.1 |
| 992  | UMHMNP132938126    | -8.3                     | -9.3 | 1047 | UMHMNP156472887    | -11.4                    | -9.3 | 1102 | UMHMNP724462480    | -8.2                     | -9.1 |
| 993  | UMHMNP147395093    | -8.1                     | -9.3 | 1048 | UMHMNP199600367    | -8.4                     | -9.3 | 1103 | UMHMNP865308607    | -9.9                     | -9.1 |
| 994  | UMHMNP147641723    | -9.1                     | -9.3 | 1049 | UMHMNP2243096      | -8.1                     | -9.3 | 1104 | UMHMNP105369899    | -8.4                     | -9.1 |
| 995  | UMHMNP158822765    | -8.5                     | -9.3 | 1050 | UMHMNP31220447     | -8.5                     | -9.3 | 1105 | UMHMNP117857724    | -8.9                     | -9.1 |
| 996  | UMHMNP163318783    | -8.8                     | -9.3 | 1051 | UMHMNP494862714    | -9.9                     | -9.3 | 1106 | UMHMNP151890823    | -10.3                    | -9.1 |
| 997  | UMHMNP17181883     | -8.1                     | -9.3 | 1052 | UMHMNP516858       | -9.3                     | -9.3 | 1107 | UMHMNP153698909    | -8.3                     | -9.1 |
| 998  | UMHMNP188112825    | -8.1                     | -9.3 | 1053 | UMHMNP74799590     | -8.3                     | -9.3 | 1108 | UMHMNP169217452    | -8.8                     | -9.1 |
| 999  | UMHMNP209408720    | -8.1                     | -9.3 | 1054 | UMHMNP876756557    | -8.9                     | -9.3 | 1109 | UMHMNP2034722      | -8.7                     | -9.1 |
| 1000 | UMHMNP209408764    | -8.7                     | -9.3 | 1055 | UMHMNP115193152    | -9.6                     | -9.3 | 1110 | UMHMNP2259907      | -9.5                     | -9.1 |

Table S1. Continued.

| No.  | Compound Name/Code | Docking Score (kcal/mol) |      | No.  | Compound Name/Code | Docking Score (kcal/mol) |      | No.  | Compound Name/Code | Docking Score (kcal/mol) |      |
|------|--------------------|--------------------------|------|------|--------------------|--------------------------|------|------|--------------------|--------------------------|------|
|      |                    | Fast                     | Mod. |      |                    | Fast                     | Mod. |      |                    | Fast                     | Mod. |
| 1111 | UMHMNP24041676     | -8.9                     | -9.1 | 1166 | UMHMNP16910320     | -9.3                     | -9.0 | 1221 | UMHMNP694436618    | -8.4                     | -9.0 |
| 1112 | UMHMNP39533738     | -8.8                     | -9.1 | 1167 | UMHMNP171114059    | -9.1                     | -9.0 | 1222 | UMHMNP80388461     | -8.4                     | -9.0 |
| 1113 | UMHMNP58514322     | -9.8                     | -9.1 | 1168 | UMHMNP175861822    | -8.7                     | -9.0 | 1223 | UMHMNP876756502    | -9.6                     | -9.0 |
| 1114 | UMHMNP87164338     | -8.3                     | -9.1 | 1169 | UMHMNP208708230    | -8.1                     | -9.0 | 1224 | UMHMNP115439617    | -8.7                     | -9.0 |
| 1115 | UMHMNP882400853    | -8.3                     | -9.1 | 1170 | UMHMNP39025279     | -8.7                     | -9.0 | 1225 | UMHMNP12626185     | -9.5                     | -9.0 |
| 1116 | UMHMNP90195441     | -8.5                     | -9.1 | 1171 | UMHMNP446862722    | -8.7                     | -9.0 | 1226 | UMHMNP140384709    | -9.0                     | -9.0 |
| 1117 | UMHMNP102054499    | -8.5                     | -9.1 | 1172 | UMHMNP4598678      | -9.7                     | -9.0 | 1227 | UMHMNP143682182    | -9.7                     | -9.0 |
| 1118 | UMHMNP107551757    | -8.4                     | -9.1 | 1173 | UMHMNP51529125     | -8.6                     | -9.0 | 1228 | UMHMNP149355760    | -10.3                    | -9.0 |
| 1119 | UMHMNP1106134      | -8.2                     | -9.1 | 1174 | UMHMNP64285854     | -8.5                     | -9.0 | 1229 | UMHMNP162830253    | -8.9                     | -9.0 |
| 1120 | UMHMNP116302284    | -10.4                    | -9.1 | 1175 | UMHMNP72154337     | -8.1                     | -9.0 | 1230 | UMHMNP175673582    | -8.3                     | -9.0 |
| 1121 | UMHMNP122540312    | -8.7                     | -9.1 | 1176 | UMHMNP81624035     | -9.6                     | -9.0 | 1231 | UMHMNP209169584    | -8.7                     | -9.0 |
| 1122 | UMHMNP15313696     | -10.9                    | -9.1 | 1177 | UMHMNP83465        | -8.2                     | -9.0 | 1232 | UMHMNP55688454     | -8.4                     | -9.0 |
| 1123 | UMHMNP171114093    | -9.2                     | -9.1 | 1178 | UMHMNP85443374     | -8.3                     | -9.0 | 1233 | UMHMNP6758710      | -9.6                     | -9.0 |
| 1124 | UMHMNP298196733    | -8.2                     | -9.1 | 1179 | UMHMNP89837978     | -8.8                     | -9.0 | 1234 | UMHMNP71801495     | -9.1                     | -9.0 |
| 1125 | UMHMNP744253483    | -9.1                     | -9.1 | 1180 | UMHMNP128629378    | -10.5                    | -9.0 | 1235 | UMHMNP848132354    | -8.2                     | -9.0 |
| 1126 | UMHMNP848132376    | -8.2                     | -9.1 | 1181 | UMHMNP129620231    | -8.2                     | -9.0 | 1236 | UMHMNP862522       | -9.9                     | -9.0 |
| 1127 | UMHMNP88840000     | -8.1                     | -9.1 | 1182 | UMHMNP139765358    | -8.4                     | -9.0 | 1237 | UMHMNP117675168    | -9.2                     | -9.0 |
| 1128 | UMHMNP96853155     | -8.6                     | -9.1 | 1183 | UMHMNP163136058    | -8.6                     | -9.0 | 1238 | UMHMNP123062431    | -8.1                     | -9.0 |
| 1129 | UMHMNP1211135000   | -9.4                     | -9.1 | 1184 | UMHMNP175861855    | -8.2                     | -9.0 | 1239 | UMHMNP123165797    | -8.4                     | -9.0 |
| 1130 | UMHMNP123086817    | -8.4                     | -9.1 | 1185 | UMHMNP238758424    | -8.9                     | -9.0 | 1240 | UMHMNP18499859     | -8.3                     | -9.0 |
| 1131 | UMHMNP133401113    | -8.8                     | -9.1 | 1186 | UMHMNP250141641    | -8.1                     | -9.0 | 1241 | UMHMNP260390781    | -8.6                     | -9.0 |
| 1132 | UMHMNP165606699    | -8.2                     | -9.1 | 1187 | UMHMNP395070903    | -9.9                     | -9.0 | 1242 | UMHMNP263764052    | -8.6                     | -9.0 |
| 1133 | UMHMNP185331935    | -8.6                     | -9.1 | 1188 | UMHMNP425368623    | -8.8                     | -9.0 | 1243 | UMHMNP264624411    | -8.1                     | -9.0 |
| 1134 | UMHMNP188111695    | -8.5                     | -9.1 | 1189 | UMHMNP52936706     | -8.7                     | -9.0 | 1244 | UMHMNP29560267     | -9.3                     | -9.0 |
| 1135 | UMHMNP260062882    | -8.2                     | -9.1 | 1190 | UMHMNP54278896     | -9.5                     | -9.0 | 1245 | UMHMNP71486049     | -9.6                     | -9.0 |
| 1136 | UMHMNP33886747     | -8.6                     | -9.1 | 1191 | UMHMNP63015907     | -8.5                     | -9.0 | 1246 | UMHMNP77965812     | -8.3                     | -9.0 |
| 1137 | UMHMNP495380488    | -8.4                     | -9.1 | 1192 | UMHMNP815586471    | -9.6                     | -9.0 | 1247 | UMHMNP124609387    | -9.4                     | -9.0 |
| 1138 | UMHMNP516552       | -8.1                     | -9.1 | 1193 | UMHMNP85066780     | -8.6                     | -9.0 | 1248 | UMHMNP133206390    | -8.4                     | -9.0 |
| 1139 | UMHMNP516790       | -9.0                     | -9.1 | 1194 | UMHMNP85733717     | -8.8                     | -9.0 | 1249 | UMHMNP142508063    | -8.1                     | -9.0 |
| 1140 | UMHMNP55051780     | -9.2                     | -9.1 | 1195 | UMHMNP96736311     | -9.0                     | -9.0 | 1250 | UMHMNP159934142    | -8.5                     | -9.0 |
| 1141 | UMHMNP69672704     | -8.4                     | -9.1 | 1196 | UMHMNP134985083    | -8.6                     | -9.0 | 1251 | UMHMNP172173998    | -8.5                     | -9.0 |
| 1142 | UMHMNP70214992     | -9.9                     | -9.1 | 1197 | UMHMNP145403254    | -8.3                     | -9.0 | 1252 | UMHMNP200860895    | -8.8                     | -9.0 |
| 1143 | UMHMNP70406_p0     | -10.2                    | -9.1 | 1198 | UMHMNP146556287    | -9.0                     | -9.0 | 1253 | UMHMNP213547252    | -8.2                     | -9.0 |
| 1144 | UMHMNP80981631     | -8.6                     | -9.1 | 1199 | UMHMNP155233311    | -9.1                     | -9.0 | 1254 | UMHMNP246037854    | -8.7                     | -9.0 |
| 1145 | UMHMNP815586493    | -9.4                     | -9.1 | 1200 | UMHMNP160098920    | -9.4                     | -9.0 | 1255 | UMHMNP246037898    | -8.7                     | -9.0 |
| 1146 | UMHMNP85337128     | -9.2                     | -9.1 | 1201 | UMHMNP175861797    | -9.2                     | -9.0 | 1256 | UMHMNP287965202    | -8.5                     | -9.0 |
| 1147 | UMHMNP85733808     | -8.2                     | -9.1 | 1202 | UMHMNP175861877    | -8.4                     | -9.0 | 1257 | UMHMNP521039       | -9.3                     | -9.0 |
| 1148 | UMHMNP99631217     | -8.8                     | -9.1 | 1203 | UMHMNP1981904      | -8.9                     | -9.0 | 1258 | UMHMNP58115314     | -9.7                     | -9.0 |
| 1149 | UMHMNP117694969    | -9.9                     | -9.1 | 1204 | UMHMNP200497047    | -8.5                     | -9.0 | 1259 | UMHMNP61897890     | -8.9                     | -9.0 |
| 1150 | UMHMNP118984466    | -9.6                     | -9.1 | 1205 | UMHMNP36011195     | -8.9                     | -9.0 | 1260 | UMHMNP69977260     | -8.9                     | -9.0 |
| 1151 | UMHMNP148471856    | -9.0                     | -9.1 | 1206 | UMHMNP676271855    | -10.3                    | -9.0 | 1261 | UMHMNP89837956     | -9.1                     | -9.0 |
| 1152 | UMHMNP151345061    | -8.5                     | -9.1 | 1207 | UMHMNP780755375    | -8.2                     | -9.0 | 1262 | UMHMNP1107591      | -8.6                     | -9.0 |
| 1153 | UMHMNP20512316     | -9.0                     | -9.1 | 1208 | UMHMNP849752870    | -8.4                     | -9.0 | 1263 | UMHMNP135474101    | -8.3                     | -9.0 |
| 1154 | UMHMNP25819798     | -8.2                     | -9.1 | 1209 | UMHMNP95062310     | -8.3                     | -9.0 | 1264 | UMHMNP143503202    | -8.8                     | -9.0 |
| 1155 | UMHMNP3090811      | -8.2                     | -9.1 | 1210 | UMHMNP116079540    | -8.1                     | -9.0 | 1265 | UMHMNP190451060    | -8.9                     | -9.0 |
| 1156 | UMHMNP313503376    | -8.5                     | -9.1 | 1211 | UMHMNP121135011    | -8.9                     | -9.0 | 1266 | UMHMNP200860908    | -9.7                     | -9.0 |
| 1157 | UMHMNP383859594    | -9.1                     | -9.1 | 1212 | UMHMNP147641712    | -8.9                     | -9.0 | 1267 | UMHMNP20829554     | -8.6                     | -9.0 |
| 1158 | UMHMNP65228140     | -8.5                     | -9.1 | 1213 | UMHMNP153585649    | -8.7                     | -9.0 | 1268 | UMHMNP212069482    | -8.9                     | -9.0 |
| 1159 | UMHMNP77521        | -9.4                     | -9.1 | 1214 | UMHMNP157622576    | -9.1                     | -9.0 | 1269 | UMHMNP2326514      | -8.8                     | -9.0 |
| 1160 | UMHMNP82660615     | -8.3                     | -9.1 | 1215 | UMHMNP167394823    | -8.8                     | -9.0 | 1270 | UMHMNP28032522     | -8.8                     | -9.0 |
| 1161 | UMHMNP88840022     | -10.1                    | -9.1 | 1216 | UMHMNP176447964    | -8.6                     | -9.0 | 1271 | UMHMNP52745876     | -8.2                     | -9.0 |
| 1162 | UMHMNP128364318    | -8.3                     | -9.0 | 1217 | UMHMNP17974775     | -9.5                     | -9.0 | 1272 | UMHMNP74920573     | -9.4                     | -9.0 |
| 1163 | UMHMNP129602193    | -8.2                     | -9.0 | 1218 | UMHMNP198274258    | -9.8                     | -9.0 | 1273 | UMHMNP749216453    | -9.6                     | -9.0 |
| 1164 | UMHMNP134515530    | -8.1                     | -9.0 | 1219 | UMHMNP475111785    | -9.0                     | -9.0 | 1274 | UMHMNP751940       | -9.2                     | -9.0 |
| 1165 | UMHMNP147170089    | -8.6                     | -9.0 | 1220 | UMHMNP54369141     | -9.4                     | -9.0 | 1275 | UMHMNP85482775     | -8.3                     | -9.0 |

Table S1. Continued.

| No.  | Compound Name/Code | Docking Score (kcal/mol) |      | No.  | Compound Name/Code | Docking Score (kcal/mol) |      | No.  | Compound Name/Code | Docking Score (kcal/mol) |      |
|------|--------------------|--------------------------|------|------|--------------------|--------------------------|------|------|--------------------|--------------------------|------|
|      |                    | Fast                     | Mod. |      |                    | Fast                     | Mod. |      |                    | Fast                     | Mod. |
| 1276 | UMHMNP87978312     | -8.9                     | -9.0 | 1331 | UMHMNP122970132    | -8.1                     | -8.9 | 1386 | UMHMNP112781256    | -8.6                     | -8.9 |
| 1277 | UMHMNP97614658     | -10.5                    | -9.0 | 1332 | UMHMNP15140597     | -8.1                     | -8.9 | 1387 | UMHMNP115982224    | -8.6                     | -8.9 |
| 1278 | UMHMNP102396156    | -8.2                     | -9.0 | 1333 | UMHMNP178180013    | -8.1                     | -8.9 | 1388 | UMHMNP141859996    | -9.8                     | -8.9 |
| 1279 | UMHMNP106849369    | -8.9                     | -9.0 | 1334 | UMHMNP186383073    | -9.4                     | -8.9 | 1389 | UMHMNP157878256    | -8.0                     | -8.9 |
| 1280 | UMHMNP107168592    | -10.0                    | -9.0 | 1335 | UMHMNP23839476     | -8.1                     | -8.9 | 1390 | UMHMNP17757072     | -9.0                     | -8.9 |
| 1281 | UMHMNP141860006    | -8.8                     | -9.0 | 1336 | UMHMNP517900526    | -9.6                     | -8.9 | 1391 | UMHMNP189514474    | -8.3                     | -8.9 |
| 1282 | UMHMNP145223650    | -9.0                     | -9.0 | 1337 | UMHMNP517900571    | -8.3                     | -8.9 | 1392 | UMHMNP26033103     | -8.1                     | -8.9 |
| 1283 | UMHMNP160324925    | -8.7                     | -9.0 | 1338 | UMHMNP80977        | -8.4                     | -8.9 | 1393 | UMHMNP31665302     | -8.6                     | -8.9 |
| 1284 | UMHMNP177196393    | -8.8                     | -9.0 | 1339 | UMHMNP81306618     | -8.6                     | -8.9 | 1394 | UMHMNP53586519     | -8.8                     | -8.9 |
| 1285 | UMHMNP22831647     | -8.6                     | -9.0 | 1340 | UMHMNP84871067     | -8.2                     | -8.9 | 1395 | UMHMNP69297514     | -8.8                     | -8.9 |
| 1286 | UMHMNP241166245    | -8.2                     | -9.0 | 1341 | UMHMNP88840011     | -8.4                     | -8.9 | 1396 | UMHMNP70206870     | -8.9                     | -8.9 |
| 1287 | UMHMNP265121060    | -8.4                     | -9.0 | 1342 | UMHMNP97484543     | -8.7                     | -8.9 | 1397 | UMHMNP78342399     | -9.2                     | -8.9 |
| 1288 | UMHMNP306997444    | -8.2                     | -9.0 | 1343 | UMHMNP102054513    | -9.0                     | -8.9 | 1398 | UMHMNP97042201     | -8.5                     | -8.9 |
| 1289 | UMHMNP516789       | -8.9                     | -9.0 | 1344 | UMHMNP116407182    | -9.3                     | -8.9 | 1399 | UMHMNP121994523    | -8.8                     | -8.9 |
| 1290 | UMHMNP55081419     | -9.1                     | -9.0 | 1345 | UMHMNP122535653    | -9.2                     | -8.9 | 1400 | UMHMNP122052953    | -9.6                     | -8.9 |
| 1291 | UMHMNP6120714      | -8.2                     | -9.0 | 1346 | UMHMNP125990207    | -9.0                     | -8.9 | 1401 | UMHMNP13163810     | -8.3                     | -8.9 |
| 1292 | UMHMNP65745473     | -9.0                     | -9.0 | 1347 | UMHMNP144398254    | -8.3                     | -8.9 | 1402 | UMHMNP133562513    | -8.2                     | -8.9 |
| 1293 | UMHMNP676132335    | -8.5                     | -9.0 | 1348 | UMHMNP157536351    | -9.1                     | -8.9 | 1403 | UMHMNP156310177    | -8.3                     | -8.9 |
| 1294 | UMHMNP777940735    | -9.0                     | -9.0 | 1349 | UMHMNP171528033    | -9.4                     | -8.9 | 1404 | UMHMNP161236631    | -8.1                     | -8.9 |
| 1295 | UMHMNP815586459    | -9.6                     | -9.0 | 1350 | UMHMNP179189027    | -8.1                     | -8.9 | 1405 | UMHMNP161776745    | -8.1                     | -8.9 |
| 1296 | UMHMNP85735144     | -9.1                     | -9.0 | 1351 | UMHMNP210969521    | -8.6                     | -8.9 | 1406 | UMHMNP165606688    | -8.6                     | -8.9 |
| 1297 | UMHMNP86126376     | -9.1                     | -9.0 | 1352 | UMHMNP287965291    | -8.7                     | -8.9 | 1407 | UMHMNP201800604    | -8.6                     | -8.9 |
| 1298 | UMHMNP111036409    | -8.1                     | -9.0 | 1353 | UMHMNP298196722    | -8.1                     | -8.9 | 1408 | UMHMNP385815305    | -8.8                     | -8.9 |
| 1299 | UMHMNP122771737    | -8.5                     | -9.0 | 1354 | UMHMNP498572900    | -8.5                     | -8.9 | 1409 | UMHMNP68654933     | -10.0                    | -8.9 |
| 1300 | UMHMNP22343460     | -8.3                     | -9.0 | 1355 | UMHMNP781646820    | -8.7                     | -8.9 | 1410 | UMHMNP72534124     | -8.5                     | -8.9 |
| 1301 | UMHMNP265121059    | -8.6                     | -9.0 | 1356 | UMHMNP791846827    | -9.1                     | -8.9 | 1411 | UMHMNP75179587     | -10.1                    | -8.9 |
| 1302 | UMHMNP2665045      | -8.8                     | -9.0 | 1357 | UMHMNP81256588     | -8.8                     | -8.9 | 1412 | UMHMNP852629619    | -9.2                     | -8.9 |
| 1303 | UMHMNP445471614    | -9.2                     | -9.0 | 1358 | UMHMNP99081795     | -8.7                     | -8.9 | 1413 | UMHMNP86851209     | -8.8                     | -8.9 |
| 1304 | UMHMNP681240551    | -9.4                     | -9.0 | 1359 | UMHMNP114995721    | -9.0                     | -8.9 | 1414 | UMHMNP110359994    | -8.3                     | -8.9 |
| 1305 | UMHMNP77674998     | -8.4                     | -9.0 | 1360 | UMHMNP138779892    | -9.1                     | -8.9 | 1415 | UMHMNP112781267    | -8.9                     | -8.9 |
| 1306 | UMHMNP117859173    | -8.3                     | -8.9 | 1361 | UMHMNP139083139    | -8.8                     | -8.9 | 1416 | UMHMNP132310919    | -8.1                     | -8.9 |
| 1307 | UMHMNP121940509    | -8.9                     | -8.9 | 1362 | UMHMNP155656001    | -8.8                     | -8.9 | 1417 | UMHMNP134029439    | -8.1                     | -8.9 |
| 1308 | UMHMNP123853690    | -8.1                     | -8.9 | 1363 | UMHMNP33646774     | -8.4                     | -8.9 | 1418 | UMHMNP139974757    | -10.0                    | -8.9 |
| 1309 | UMHMNP142060035    | -9.1                     | -8.9 | 1364 | UMHMNP338949090    | -8.1                     | -8.9 | 1419 | UMHMNP157924862    | -8.3                     | -8.9 |
| 1310 | UMHMNP147170090    | -8.9                     | -8.9 | 1365 | UMHMNP41398725     | -8.6                     | -8.9 | 1420 | UMHMNP211311089    | -8.4                     | -8.9 |
| 1311 | UMHMNP147641745    | -8.9                     | -8.9 | 1366 | UMHMNP545471       | -8.5                     | -8.9 | 1421 | UMHMNP326794165    | -9.0                     | -8.9 |
| 1312 | UMHMNP151890801    | -8.8                     | -8.9 | 1367 | UMHMNP61737960     | -8.9                     | -8.9 | 1422 | UMHMNP473739398    | -9.5                     | -8.9 |
| 1313 | UMHMNP425368645    | -8.9                     | -8.9 | 1368 | UMHMNP65754678     | -9.1                     | -8.9 | 1423 | UMHMNP53527289     | -8.8                     | -8.9 |
| 1314 | UMHMNP681227532    | -8.5                     | -8.9 | 1369 | UMHMNP77517330     | -8.1                     | -8.9 | 1424 | UMHMNP799808289    | -8.2                     | -8.9 |
| 1315 | UMHMNP682808908    | -8.3                     | -8.9 | 1370 | UMHMNP782491796    | -8.8                     | -8.9 | 1425 | UMHMNP804531462    | -8.7                     | -8.9 |
| 1316 | UMHMNP70329269     | -9.8                     | -8.9 | 1371 | UMHMNP849215958    | -8.4                     | -8.9 | 1426 | UMHMNP97530739     | -9.1                     | -8.9 |
| 1317 | UMHMNP72560373     | -8.8                     | -8.9 | 1372 | UMHMNP863493032    | -8.6                     | -8.9 | 1427 | UMHMNP113269424    | -8.2                     | -8.9 |
| 1318 | UMHMNP74145703     | -8.2                     | -8.9 | 1373 | UMHMNP95513636     | -8.3                     | -8.9 | 1428 | UMHMNP139975556    | -8.3                     | -8.9 |
| 1319 | UMHMNP862286713    | -8.5                     | -8.9 | 1374 | UMHMNP99250176     | -8.3                     | -8.9 | 1429 | UMHMNP142780276    | -8.7                     | -8.9 |
| 1320 | UMHMNP93474147     | -8.8                     | -8.9 | 1375 | UMHMNP149636920    | -8.4                     | -8.9 | 1430 | UMHMNP145075021    | -8.3                     | -8.9 |
| 1321 | UMHMNP144335159    | -9.4                     | -8.9 | 1376 | UMHMNP155656012    | -8.7                     | -8.9 | 1431 | UMHMNP151345083    | -8.2                     | -8.9 |
| 1322 | UMHMNP209408753    | -9.8                     | -8.9 | 1377 | UMHMNP23235678     | -8.9                     | -8.9 | 1432 | UMHMNP160316621    | -9.1                     | -8.9 |
| 1323 | UMHMNP20981593     | -8.6                     | -8.9 | 1378 | UMHMNP2572523      | -9.0                     | -8.9 | 1433 | UMHMNP161470220    | -8.3                     | -8.9 |
| 1324 | UMHMNP228575244    | -8.6                     | -8.9 | 1379 | UMHMNP346706476    | -8.6                     | -8.9 | 1434 | UMHMNP169387751    | -8.4                     | -8.9 |
| 1325 | UMHMNP338949103    | -8.5                     | -8.9 | 1380 | UMHMNP53190888     | -9.0                     | -8.9 | 1435 | UMHMNP173693486    | -8.6                     | -8.9 |
| 1326 | UMHMNP60422880     | -8.6                     | -8.9 | 1381 | UMHMNP681240540    | -8.5                     | -8.9 | 1436 | UMHMNP199165883    | -9.9                     | -8.9 |
| 1327 | UMHMNP62861136     | -8.6                     | -8.9 | 1382 | UMHMNP70117214     | -8.6                     | -8.9 | 1437 | UMHMNP433264621    | -9.6                     | -8.9 |
| 1328 | UMHMNP781646795    | -8.4                     | -8.9 | 1383 | UMHMNP74175943     | -9.8                     | -8.9 | 1438 | UMHMNP6277141      | -9.0                     | -8.9 |
| 1329 | UMHMNP85733706     | -8.3                     | -8.9 | 1384 | UMHMNP102396214    | -10.7                    | -8.9 | 1439 | UMHMNP64190701     | -8.6                     | -8.9 |
| 1330 | UMHMNP111768162    | -9.1                     | -8.9 | 1385 | UMHMNP104387146    | -8.7                     | -8.9 | 1440 | UMHMNP78518737     | -8.2                     | -8.9 |

Table S1. Continued.

| No.  | Compound Name/Code | Docking Score (kcal/mol) |      | No.  | Compound Name/Code | Docking Score (kcal/mol) |      | No.  | Compound Name/Code | Docking Score (kcal/mol) |      |
|------|--------------------|--------------------------|------|------|--------------------|--------------------------|------|------|--------------------|--------------------------|------|
|      |                    | Fast                     | Mod. |      |                    | Fast                     | Mod. |      |                    | Fast                     | Mod. |
| 1441 | UMHMNP83136883     | -8.4                     | -8.9 | 1496 | UMHMNP5259289      | -9.2                     | -8.8 | 1551 | UMHMNP901564       | -9.0                     | -8.8 |
| 1442 | UMHMNP88640215     | -8.5                     | -8.9 | 1497 | UMHMNP566267       | -8.5                     | -8.8 | 1552 | UMHMNP92804687     | -9.2                     | -8.8 |
| 1443 | UMHMNP90375603     | -8.3                     | -8.9 | 1498 | UMHMNP62073794     | -9.3                     | -8.8 | 1553 | UMHMNP113831008    | -9.2                     | -8.8 |
| 1444 | UMHMNP1042597      | -8.9                     | -8.8 | 1499 | UMHMNP73622216     | -8.2                     | -8.8 | 1554 | UMHMNP11598231     | -8.9                     | -8.8 |
| 1445 | UMHMNP120963613    | -8.0                     | -8.8 | 1500 | UMHMNP75605866     | -8.2                     | -8.8 | 1555 | UMHMNP150417699    | -8.2                     | -8.8 |
| 1446 | UMHMNP132278412    | -8.4                     | -8.8 | 1501 | UMHMNP130203677    | -10.7                    | -8.8 | 1556 | UMHMNP190451048    | -8.8                     | -8.8 |
| 1447 | UMHMNP136762975    | -8.4                     | -8.8 | 1502 | UMHMNP138843206    | -9.1                     | -8.8 | 1557 | UMHMNP23820760     | -8.8                     | -8.8 |
| 1448 | UMHMNP146471843    | -9.5                     | -8.8 | 1503 | UMHMNP151345107    | -8.8                     | -8.8 | 1558 | UMHMNP27857121     | -9.7                     | -8.8 |
| 1449 | UMHMNP149298000    | -8.5                     | -8.8 | 1504 | UMHMNP176181865    | -8.4                     | -8.8 | 1559 | UMHMNP306997411    | -8.7                     | -8.8 |
| 1450 | UMHMNP159518771    | -8.6                     | -8.8 | 1505 | UMHMNP2034744      | -8.9                     | -8.8 | 1560 | UMHMNP5241247      | -9.6                     | -8.8 |
| 1451 | UMHMNP16649415     | -8.9                     | -8.8 | 1506 | UMHMNP23983439     | -9.0                     | -8.8 | 1561 | UMHMNP561637       | -10.9                    | -8.8 |
| 1452 | UMHMNP221367904    | -8.8                     | -8.8 | 1507 | UMHMNP267407250    | -8.7                     | -8.8 | 1562 | UMHMNP732296536    | -8.3                     | -8.8 |
| 1453 | UMHMNP256377681    | -9.8                     | -8.8 | 1508 | UMHMNP50391725     | -8.5                     | -8.8 | 1563 | UMHMNP737006621    | -8.8                     | -8.8 |
| 1454 | UMHMNP273746397    | -9.6                     | -8.8 | 1509 | UMHMNP59957403     | -8.2                     | -8.8 | 1564 | UMHMNP753001739    | -8.9                     | -8.8 |
| 1455 | UMHMNP4575740      | -8.4                     | -8.8 | 1510 | UMHMNP65754634     | -8.4                     | -8.8 | 1565 | UMHMNP79849379     | -8.3                     | -8.8 |
| 1456 | UMHMNP459412056    | -8.4                     | -8.8 | 1511 | UMHMNP73436358     | -8.2                     | -8.8 | 1566 | UMHMNP109872459    | -9.9                     | -8.8 |
| 1457 | UMHMNP479637064    | -8.9                     | -8.8 | 1512 | UMHMNP750594       | -9.6                     | -8.8 | 1567 | UMHMNP145525333    | -9.4                     | -8.8 |
| 1458 | UMHMNP51489_p0     | -8.4                     | -8.8 | 1513 | UMHMNP113626769    | -8.4                     | -8.8 | 1568 | UMHMNP146488633    | -8.4                     | -8.8 |
| 1459 | UMHMNP62073863     | -8.7                     | -8.8 | 1514 | UMHMNP121442248    | -8.3                     | -8.8 | 1569 | UMHMNP154205193    | -8.5                     | -8.8 |
| 1460 | UMHMNP68671487     | -8.6                     | -8.8 | 1515 | UMHMNP123794309    | -9.0                     | -8.8 | 1570 | UMHMNP168781791    | -8.1                     | -8.8 |
| 1461 | UMHMNP69081874     | -8.8                     | -8.8 | 1516 | UMHMNP142677109    | -10.3                    | -8.8 | 1571 | UMHMNP171440236    | -8.6                     | -8.8 |
| 1462 | UMHMNP70214981     | -9.2                     | -8.8 | 1517 | UMHMNP145398625    | -8.2                     | -8.8 | 1572 | UMHMNP29478419     | -8.2                     | -8.8 |
| 1463 | UMHMNP81657785     | -8.5                     | -8.8 | 1518 | UMHMNP194020412    | -9.5                     | -8.8 | 1573 | UMHMNP36564291     | -9.5                     | -8.8 |
| 1464 | UMHMNP84323295     | -8.3                     | -8.8 | 1519 | UMHMNP205750250    | -8.3                     | -8.8 | 1574 | UMHMNP4192147      | -9.2                     | -8.8 |
| 1465 | UMHMNP85733693     | -8.7                     | -8.8 | 1520 | UMHMNP211311103    | -9.2                     | -8.8 | 1575 | UMHMNP433717556    | -8.1                     | -8.8 |
| 1466 | UMHMNP90195407     | -9.9                     | -8.8 | 1521 | UMHMNP211555032    | -8.5                     | -8.8 | 1576 | UMHMNP474779754    | -9.7                     | -8.8 |
| 1467 | UMHMNP105969651    | -8.7                     | -8.8 | 1522 | UMHMNP259670843    | -8.1                     | -8.8 | 1577 | UMHMNP60422879     | -8.1                     | -8.8 |
| 1468 | UMHMNP112514428    | -8.2                     | -8.8 | 1523 | UMHMNP263764029    | -9.8                     | -8.8 | 1578 | UMHMNP7069423      | -8.4                     | -8.8 |
| 1469 | UMHMNP116102400    | -8.4                     | -8.8 | 1524 | UMHMNP351441184    | -9.6                     | -8.8 | 1579 | UMHMNP97877708     | -8.4                     | -8.8 |
| 1470 | UMHMNP1236142      | -9.3                     | -8.8 | 1525 | UMHMNP474680       | -8.9                     | -8.8 | 1580 | UMHMNP102054502    | -8.8                     | -8.8 |
| 1471 | UMHMNP155521203    | -8.4                     | -8.8 | 1526 | UMHMNP54848292     | -9.1                     | -8.8 | 1581 | UMHMNP108675645    | -8.2                     | -8.8 |
| 1472 | UMHMNP175861786    | -9.5                     | -8.8 | 1527 | UMHMNP55088750     | -9.1                     | -8.8 | 1582 | UMHMNP11052327     | -8.3                     | -8.8 |
| 1473 | UMHMNP329050217    | -9.0                     | -8.8 | 1528 | UMHMNP63814493     | -8.8                     | -8.8 | 1583 | UMHMNP115982213    | -8.3                     | -8.8 |
| 1474 | UMHMNP65754623     | -8.9                     | -8.8 | 1529 | UMHMNP663597851    | -8.1                     | -8.8 | 1584 | UMHMNP122535642    | -8.8                     | -8.8 |
| 1475 | UMHMNP74799589     | -9.6                     | -8.8 | 1530 | UMHMNP708255985    | -8.6                     | -8.8 | 1585 | UMHMNP133625260    | -9.4                     | -8.8 |
| 1476 | UMHMNP78370851     | -9.0                     | -8.8 | 1531 | UMHMNP794536928    | -8.0                     | -8.8 | 1586 | UMHMNP134981809    | -9.5                     | -8.8 |
| 1477 | UMHMNP83704147     | -8.2                     | -8.8 | 1532 | UMHMNP80388472     | -8.1                     | -8.8 | 1587 | UMHMNP139083219    | -9.7                     | -8.8 |
| 1478 | UMHMNP856414567    | -9.2                     | -8.8 | 1533 | UMHMNP85650255     | -9.2                     | -8.8 | 1588 | UMHMNP191212370    | -9.4                     | -8.8 |
| 1479 | UMHMNP856414603    | -8.3                     | -8.8 | 1534 | UMHMNP862286735    | -9.0                     | -8.8 | 1589 | UMHMNP191803404    | -8.3                     | -8.8 |
| 1480 | UMHMNP85733728     | -9.3                     | -8.8 | 1535 | UMHMNP87532261     | -9.7                     | -8.8 | 1590 | UMHMNP479201564    | -8.1                     | -8.8 |
| 1481 | UMHMNP95043188     | -8.1                     | -8.8 | 1536 | UMHMNP94935996     | -8.4                     | -8.8 | 1591 | UMHMNP547988       | -8.7                     | -8.8 |
| 1482 | UMHMNP984872       | -8.1                     | -8.8 | 1537 | UMHMNP99481535     | -8.4                     | -8.8 | 1592 | UMHMNP55708742     | -10.1                    | -8.8 |
| 1483 | UMHMNP99081784     | -8.1                     | -8.8 | 1538 | UMHMNP133587163    | -8.2                     | -8.8 | 1593 | UMHMNP56362426     | -8.2                     | -8.8 |
| 1484 | UMHMNP107748878    | -8.7                     | -8.8 | 1539 | UMHMNP144587564    | -8.8                     | -8.8 | 1594 | UMHMNP63250226     | -8.9                     | -8.8 |
| 1485 | UMHMNP122052942    | -8.5                     | -8.8 | 1540 | UMHMNP175861866    | -9.5                     | -8.8 | 1595 | UMHMNP681240642    | -9.3                     | -8.8 |
| 1486 | UMHMNP122353291    | -9.0                     | -8.8 | 1541 | UMHMNP179733154    | -8.2                     | -8.8 | 1596 | UMHMNP92125694     | -8.6                     | -8.8 |
| 1487 | UMHMNP1256866      | -9.8                     | -8.8 | 1542 | UMHMNP186820553    | -8.8                     | -8.8 | 1597 | UMHMNP116428638    | -8.3                     | -8.8 |
| 1488 | UMHMNP132410403    | -8.1                     | -8.8 | 1543 | UMHMNP189083792    | -8.2                     | -8.8 | 1598 | UMHMNP118169361    | -9.5                     | -8.8 |
| 1489 | UMHMNP132774211    | -9.0                     | -8.8 | 1544 | UMHMNP201213027    | -8.8                     | -8.8 | 1599 | UMHMNP156953876    | -8.6                     | -8.8 |
| 1490 | UMHMNP151029413    | -10.7                    | -8.8 | 1545 | UMHMNP213749816    | -8.6                     | -8.8 | 1600 | UMHMNP1715862      | -8.9                     | -8.8 |
| 1491 | UMHMNP152213677    | -8.7                     | -8.8 | 1546 | UMHMNP2790321      | -8.6                     | -8.8 | 1601 | UMHMNP182806140    | -8.7                     | -8.8 |
| 1492 | UMHMNP184348398    | -9.1                     | -8.8 | 1547 | UMHMNP65754690     | -8.3                     | -8.8 | 1602 | UMHMNP185331968    | -8.9                     | -8.8 |
| 1493 | UMHMNP193619420    | -8.7                     | -8.8 | 1548 | UMHMNP81575782     | -9.7                     | -8.8 | 1603 | UMHMNP28636251     | -9.8                     | -8.8 |
| 1494 | UMHMNP19633955     | -8.3                     | -8.8 | 1549 | UMHMNP84323284     | -9.9                     | -8.8 | 1604 | UMHMNP387791       | -9.2                     | -8.8 |
| 1495 | UMHMNP196868005    | -8.4                     | -8.8 | 1550 | UMHMNP87411845     | -9.1                     | -8.8 | 1605 | UMHMNP571176948    | -8.6                     | -8.8 |

Table S1. Continued.

| No.  | Compound Name/Code | Docking Score (kcal/mol) |      | No.  | Compound Name/Code | Docking Score (kcal/mol) |      | No.  | Compound Name/Code | Docking Score (kcal/mol) |      |
|------|--------------------|--------------------------|------|------|--------------------|--------------------------|------|------|--------------------|--------------------------|------|
|      |                    | Fast                     | Mod. |      |                    | Fast                     | Mod. |      |                    | Fast                     | Mod. |
| 1606 | UMHMNP61263830     | -8.1                     | -8.8 | 1661 | UMHMNP93379578     | -9.3                     | -8.7 | 1716 | UMHMNP40517860     | -8.4                     | -8.7 |
| 1607 | UMHMNP81387873     | -9.2                     | -8.8 | 1662 | UMHMNP100046046    | -9.1                     | -8.7 | 1717 | UMHMNP445471590    | -8.3                     | -8.7 |
| 1608 | UMHMNP83995044     | -8.9                     | -8.8 | 1663 | UMHMNP104855201    | -8.4                     | -8.7 | 1718 | UMHMNP472877       | -8.8                     | -8.7 |
| 1609 | UMHMNP856414523    | -8.9                     | -8.8 | 1664 | UMHMNP110271222    | -8.8                     | -8.7 | 1719 | UMHMNP53866367     | -9.7                     | -8.7 |
| 1610 | UMHMNP90195430     | -10.0                    | -8.8 | 1665 | UMHMNP126723168    | -8.6                     | -8.7 | 1720 | UMHMNP55081420     | -9.1                     | -8.7 |
| 1611 | UMHMNP90735436     | -8.6                     | -8.8 | 1666 | UMHMNP135048598    | -8.7                     | -8.7 | 1721 | UMHMNP63693185     | -9.0                     | -8.7 |
| 1612 | UMHMNP10395365     | -8.2                     | -8.7 | 1667 | UMHMNP157469404    | -8.1                     | -8.7 | 1722 | UMHMNP67506198     | -9.6                     | -8.7 |
| 1613 | UMHMNP105064297    | -9.5                     | -8.7 | 1668 | UMHMNP157622612    | -8.1                     | -8.7 | 1723 | UMHMNP71239651     | -8.5                     | -8.7 |
| 1614 | UMHMNP122271914    | -9.3                     | -8.7 | 1669 | UMHMNP20224708     | -9.2                     | -8.7 | 1724 | UMHMNP74055439     | -8.5                     | -8.7 |
| 1615 | UMHMNP122876691    | -8.9                     | -8.7 | 1670 | UMHMNP204716063    | -8.6                     | -8.7 | 1725 | UMHMNP95513647     | -10.3                    | -8.7 |
| 1616 | UMHMNP1232195      | -8.4                     | -8.7 | 1671 | UMHMNP212069506    | -8.4                     | -8.7 | 1726 | UMHMNP127524598    | -8.1                     | -8.7 |
| 1617 | UMHMNP128631209    | -8.2                     | -8.7 | 1672 | UMHMNP24041687     | -8.4                     | -8.7 | 1727 | UMHMNP139765381    | -9.4                     | -8.7 |
| 1618 | UMHMNP131501274    | -8.9                     | -8.7 | 1673 | UMHMNP474417544    | -8.2                     | -8.7 | 1728 | UMHMNP144686419    | -9.1                     | -8.7 |
| 1619 | UMHMNP1406162      | -8.5                     | -8.7 | 1674 | UMHMNP55303996     | -9.2                     | -8.7 | 1729 | UMHMNP147641734    | -9.5                     | -8.7 |
| 1620 | UMHMNP186313008    | -8.3                     | -8.7 | 1675 | UMHMNP62858257     | -9.2                     | -8.7 | 1730 | UMHMNP157047580    | -10.4                    | -8.7 |
| 1621 | UMHMNP34218945     | -8.9                     | -8.7 | 1676 | UMHMNP85650244     | -9.2                     | -8.7 | 1731 | UMHMNP204716030    | -8.9                     | -8.7 |
| 1622 | UMHMNP446862700    | -8.6                     | -8.7 | 1677 | UMHMNP90038247     | -8.5                     | -8.7 | 1732 | UMHMNP272458329    | -9.6                     | -8.7 |
| 1623 | UMHMNP52043002     | -9.2                     | -8.7 | 1678 | UMHMNP105815905    | -9.9                     | -8.7 | 1733 | UMHMNP286437749    | -8.3                     | -8.7 |
| 1624 | UMHMNP648883301    | -10.3                    | -8.7 | 1679 | UMHMNP106521613    | -8.9                     | -8.7 | 1734 | UMHMNP55870014     | -8.4                     | -8.7 |
| 1625 | UMHMNP79067735     | -9.4                     | -8.7 | 1680 | UMHMNP129369422    | -8.1                     | -8.7 | 1735 | UMHMNP64118747     | -9.5                     | -8.7 |
| 1626 | UMHMNP862587175    | -8.4                     | -8.7 | 1681 | UMHMNP141544594    | -9.0                     | -8.7 | 1736 | UMHMNP66082313     | -8.1                     | -8.7 |
| 1627 | UMHMNP100244368    | -8.7                     | -8.7 | 1682 | UMHMNP15073844     | -9.3                     | -8.7 | 1737 | UMHMNP79801        | -9.2                     | -8.7 |
| 1628 | UMHMNP105708756    | -9.1                     | -8.7 | 1683 | UMHMNP208708241    | -8.7                     | -8.7 | 1738 | UMHMNP85337139     | -10.1                    | -8.7 |
| 1629 | UMHMNP126622637    | -8.0                     | -8.7 | 1684 | UMHMNP288851310    | -9.2                     | -8.7 | 1739 | UMHMNP86047145     | -8.5                     | -8.7 |
| 1630 | UMHMNP134779343    | -8.2                     | -8.7 | 1685 | UMHMNP434162       | -8.1                     | -8.7 | 1740 | UMHMNP86766010     | -8.6                     | -8.7 |
| 1631 | UMHMNP135626561    | -9.7                     | -8.7 | 1686 | UMHMNP55831271     | -9.4                     | -8.7 | 1741 | UMHMNP871117805    | -8.2                     | -8.7 |
| 1632 | UMHMNP151171185    | -9.2                     | -8.7 | 1687 | UMHMNP78285968     | -8.5                     | -8.7 | 1742 | UMHMNP112058045    | -8.6                     | -8.7 |
| 1633 | UMHMNP155416345    | -8.6                     | -8.7 | 1688 | UMHMNP81387828     | -8.6                     | -8.7 | 1743 | UMHMNP117823344    | -9.0                     | -8.7 |
| 1634 | UMHMNP168434137    | -8.7                     | -8.7 | 1689 | UMHMNP889890613    | -9.5                     | -8.7 | 1744 | UMHMNP126026571    | -8.7                     | -8.7 |
| 1635 | UMHMNP172723352    | -10.9                    | -8.7 | 1690 | UMHMNP95062309     | -8.1                     | -8.7 | 1745 | UMHMNP132410389    | -8.8                     | -8.7 |
| 1636 | UMHMNP185543924    | -10.0                    | -8.7 | 1691 | UMHMNP95513614     | -9.1                     | -8.7 | 1746 | UMHMNP133738439    | -8.8                     | -8.7 |
| 1637 | UMHMNP197381638    | -9.7                     | -8.7 | 1692 | UMHMNP99617455     | -9.0                     | -8.7 | 1747 | UMHMNP136763003    | -8.5                     | -8.7 |
| 1638 | UMHMNP526432       | -8.9                     | -8.7 | 1693 | UMHMNP133401135    | -9.2                     | -8.7 | 1748 | UMHMNP156312071    | -8.1                     | -8.7 |
| 1639 | UMHMNP54602196     | -8.9                     | -8.7 | 1694 | UMHMNP135529690    | -9.4                     | -8.7 | 1749 | UMHMNP156953843    | -9.8                     | -8.7 |
| 1640 | UMHMNP56258323     | -9.5                     | -8.7 | 1695 | UMHMNP135574617    | -8.8                     | -8.7 | 1750 | UMHMNP163136047    | -8.5                     | -8.7 |
| 1641 | UMHMNP63015918     | -8.2                     | -8.7 | 1696 | UMHMNP160522156    | -9.7                     | -8.7 | 1751 | UMHMNP164081032    | -8.2                     | -8.7 |
| 1642 | UMHMNP76907636     | -8.6                     | -8.7 | 1697 | UMHMNP169340005    | -8.6                     | -8.7 | 1752 | UMHMNP185139315    | -8.1                     | -8.7 |
| 1643 | UMHMNP83995055     | -9.7                     | -8.7 | 1698 | UMHMNP516881       | -8.2                     | -8.7 | 1753 | UMHMNP220503297    | -8.9                     | -8.7 |
| 1644 | UMHMNP97614636     | -8.1                     | -8.7 | 1699 | UMHMNP566654       | -9.7                     | -8.7 | 1754 | UMHMNP273202850    | -8.4                     | -8.7 |
| 1645 | UMHMNP99957263     | -8.3                     | -8.7 | 1700 | UMHMNP79781661     | -8.7                     | -8.7 | 1755 | UMHMNP356566820    | -8.6                     | -8.7 |
| 1646 | UMHMNP106001381    | -8.3                     | -8.7 | 1701 | UMHMNP847450753    | -8.2                     | -8.7 | 1756 | UMHMNP37717058     | -9.2                     | -8.7 |
| 1647 | UMHMNP115141474    | -8.3                     | -8.7 | 1702 | UMHMNP90267917     | -8.7                     | -8.7 | 1757 | UMHMNP405274171    | -9.2                     | -8.7 |
| 1648 | UMHMNP130799370    | -9.7                     | -8.7 | 1703 | UMHMNP99081762     | -8.8                     | -8.7 | 1758 | UMHMNP71841979     | -8.2                     | -8.7 |
| 1649 | UMHMNP145398716    | -8.4                     | -8.7 | 1704 | UMHMNP100019247    | -8.6                     | -8.7 | 1759 | UMHMNP76758195     | -9.0                     | -8.7 |
| 1650 | UMHMNP17297788     | -10.3                    | -8.7 | 1705 | UMHMNP112523883    | -8.2                     | -8.7 | 1760 | UMHMNP79664623     | -8.7                     | -8.7 |
| 1651 | UMHMNP212069493    | -9.0                     | -8.7 | 1706 | UMHMNP114915343    | -9.8                     | -8.7 | 1761 | UMHMNP110612287    | -9.0                     | -8.7 |
| 1652 | UMHMNP28056191     | -8.9                     | -8.7 | 1707 | UMHMNP126572734    | -8.1                     | -8.7 | 1762 | UMHMNP111427975    | -8.3                     | -8.7 |
| 1653 | UMHMNP435327063    | -8.6                     | -8.7 | 1708 | UMHMNP133883100    | -8.1                     | -8.7 | 1763 | UMHMNP118964366    | -8.1                     | -8.7 |
| 1654 | UMHMNP446862711    | -8.4                     | -8.7 | 1709 | UMHMNP134887299    | -8.4                     | -8.7 | 1764 | UMHMNP143007298    | -8.2                     | -8.7 |
| 1655 | UMHMNP449166001    | -10.2                    | -8.7 | 1710 | UMHMNP156953956    | -8.9                     | -8.7 | 1765 | UMHMNP156352646    | -9.4                     | -8.7 |
| 1656 | UMHMNP5241225      | -8.2                     | -8.7 | 1711 | UMHMNP158761138    | -9.3                     | -8.7 | 1766 | UMHMNP161099543    | -8.9                     | -8.7 |
| 1657 | UMHMNP678183932    | -8.6                     | -8.7 | 1712 | UMHMNP169217463    | -8.8                     | -8.7 | 1767 | UMHMNP164672553    | -10.1                    | -8.7 |
| 1658 | UMHMNP690627555    | -8.2                     | -8.7 | 1713 | UMHMNP181034980    | -11.1                    | -8.7 | 1768 | UMHMNP169387762    | -8.2                     | -8.7 |
| 1659 | UMHMNP690627566    | -8.3                     | -8.7 | 1714 | UMHMNP34350840     | -9.5                     | -8.7 | 1769 | UMHMNP20780374     | -8.4                     | -8.7 |
| 1660 | UMHMNP90195394     | -9.2                     | -8.7 | 1715 | UMHMNP365541680    | -8.2                     | -8.7 | 1770 | UMHMNP2130178      | -8.4                     | -8.7 |

Table S1. Continued.

| No.  | Compound Name/Code | Docking Score (kcal/mol) |      | No.  | Compound Name/Code | Docking Score (kcal/mol) |      | No.  | Compound Name/Code | Docking Score (kcal/mol) |      |
|------|--------------------|--------------------------|------|------|--------------------|--------------------------|------|------|--------------------|--------------------------|------|
|      |                    | Fast                     | Mod. |      |                    | Fast                     | Mod. |      |                    | Fast                     | Mod. |
| 1771 | UMHMNP255882098    | -9.2                     | -8.7 | 1826 | UMHMNP171090816    | -9.7                     | -8.6 | 1881 | UMHMNP200437667    | -8.3                     | -8.6 |
| 1772 | UMHMNP4651483      | -8.1                     | -8.7 | 1827 | UMHMNP174024976    | -8.9                     | -8.6 | 1882 | UMHMNP233607653    | -9.0                     | -8.6 |
| 1773 | UMHMNP509095209    | -8.3                     | -8.7 | 1828 | UMHMNP188558012    | -8.9                     | -8.6 | 1883 | UMHMNP452934962    | -9.2                     | -8.6 |
| 1774 | UMHMNP549521280    | -8.7                     | -8.7 | 1829 | UMHMNP188558501    | -8.1                     | -8.6 | 1884 | UMHMNP675106215    | -9.1                     | -8.6 |
| 1775 | UMHMNP58844614     | -9.3                     | -8.7 | 1830 | UMHMNP207385088    | -8.2                     | -8.6 | 1885 | UMHMNP676348940    | -9.2                     | -8.6 |
| 1776 | UMHMNP70363870     | -8.1                     | -8.7 | 1831 | UMHMNP22488626     | -9.7                     | -8.6 | 1886 | UMHMNP79405688     | -11.0                    | -8.6 |
| 1777 | UMHMNP856414501    | -9.5                     | -8.7 | 1832 | UMHMNP343573615    | -9.3                     | -8.6 | 1887 | UMHMNP868395908    | -9.4                     | -8.6 |
| 1778 | UMHMNP85733751     | -8.5                     | -8.7 | 1833 | UMHMNP351198099    | -8.3                     | -8.6 | 1888 | UMHMNP872721841    | -9.3                     | -8.6 |
| 1779 | UMHMNP95513625     | -8.2                     | -8.7 | 1834 | UMHMNP465952       | -8.5                     | -8.6 | 1889 | UMHMNP96999358     | -8.2                     | -8.6 |
| 1780 | UMHMNP10583047     | -8.3                     | -8.6 | 1835 | UMHMNP53190899     | -8.6                     | -8.6 | 1890 | UMHMNP114915321    | -8.7                     | -8.6 |
| 1781 | UMHMNP106211910    | -8.1                     | -8.6 | 1836 | UMHMNP55486061     | -8.6                     | -8.6 | 1891 | UMHMNP138629897    | -8.5                     | -8.6 |
| 1782 | UMHMNP117694970    | -8.3                     | -8.6 | 1837 | UMHMNP57291880     | -8.6                     | -8.6 | 1892 | UMHMNP141321122    | -9.1                     | -8.6 |
| 1783 | UMHMNP131998544    | -9.6                     | -8.6 | 1838 | UMHMNP578745_t0    | -8.4                     | -8.6 | 1893 | UMHMNP158761127    | -9.0                     | -8.6 |
| 1784 | UMHMNP132410367    | -8.3                     | -8.6 | 1839 | UMHMNP623167704    | -9.8                     | -8.6 | 1894 | UMHMNP164991655    | -10.7                    | -8.6 |
| 1785 | UMHMNP133607860    | -9.2                     | -8.6 | 1840 | UMHMNP82471156     | -8.7                     | -8.6 | 1895 | UMHMNP176704077    | -9.1                     | -8.6 |
| 1786 | UMHMNP145940745    | -8.7                     | -8.6 | 1841 | UMHMNP858950364    | -9.1                     | -8.6 | 1896 | UMHMNP181423712    | -8.3                     | -8.6 |
| 1787 | UMHMNP148000151    | -9.2                     | -8.6 | 1842 | UMHMNP95513578     | -8.9                     | -8.6 | 1897 | UMHMNP197381694    | -8.6                     | -8.6 |
| 1788 | UMHMNP159898110    | -8.1                     | -8.6 | 1843 | UMHMNP99624109     | -8.7                     | -8.6 | 1898 | UMHMNP39832683     | -8.9                     | -8.6 |
| 1789 | UMHMNP165815838    | -8.4                     | -8.6 | 1844 | UMHMNP100667741    | -8.6                     | -8.6 | 1899 | UMHMNP466690551    | -8.7                     | -8.6 |
| 1790 | UMHMNP170473628    | -8.5                     | -8.6 | 1845 | UMHMNP13327792     | -8.2                     | -8.6 | 1900 | UMHMNP55897773     | -8.1                     | -8.6 |
| 1791 | UMHMNP221169773    | -8.3                     | -8.6 | 1846 | UMHMNP142060002    | -8.1                     | -8.6 | 1901 | UMHMNP64825805     | -8.2                     | -8.6 |
| 1792 | UMHMNP29953502     | -8.1                     | -8.6 | 1847 | UMHMNP165337804    | -9.7                     | -8.6 | 1902 | UMHMNP866403750    | -8.6                     | -8.6 |
| 1793 | UMHMNP310396691    | -8.5                     | -8.6 | 1848 | UMHMNP165967000    | -8.4                     | -8.6 | 1903 | UMHMNP92679077     | -8.1                     | -8.6 |
| 1794 | UMHMNP5258866      | -8.9                     | -8.6 | 1849 | UMHMNP169565780    | -8.4                     | -8.6 | 1904 | UMHMNP97190404     | -9.2                     | -8.6 |
| 1795 | UMHMNP781646784    | -9.0                     | -8.6 | 1850 | UMHMNP478945652    | -8.7                     | -8.6 | 1905 | UMHMNP114774866    | -8.5                     | -8.6 |
| 1796 | UMHMNP871117792    | -8.1                     | -8.6 | 1851 | UMHMNP57103205     | -9.1                     | -8.6 | 1906 | UMHMNP123200566    | -8.5                     | -8.6 |
| 1797 | UMHMNP108695825    | -9.3                     | -8.6 | 1852 | UMHMNP70206869     | -8.2                     | -8.6 | 1907 | UMHMNP129602182    | -8.8                     | -8.6 |
| 1798 | UMHMNP119105178    | -8.1                     | -8.6 | 1853 | UMHMNP80999        | -8.8                     | -8.6 | 1908 | UMHMNP145398705    | -8.7                     | -8.6 |
| 1799 | UMHMNP142677096    | -10.2                    | -8.6 | 1854 | UMHMNP81855461     | -8.6                     | -8.6 | 1909 | UMHMNP156848678    | -8.1                     | -8.6 |
| 1800 | UMHMNP169565871    | -9.5                     | -8.6 | 1855 | UMHMNP82054215     | -9.4                     | -8.6 | 1910 | UMHMNP211118988    | -9.9                     | -8.6 |
| 1801 | UMHMNP250727016    | -8.3                     | -8.6 | 1856 | UMHMNP876754777    | -8.2                     | -8.6 | 1911 | UMHMNP221012799    | -9.4                     | -8.6 |
| 1802 | UMHMNP263744736    | -9.9                     | -8.6 | 1857 | UMHMNP133805035    | -8.0                     | -8.6 | 1912 | UMHMNP30674329     | -8.2                     | -8.6 |
| 1803 | UMHMNP475111796    | -8.5                     | -8.6 | 1858 | UMHMNP154512239    | -9.3                     | -8.6 | 1913 | UMHMNP329050193    | -8.3                     | -8.6 |
| 1804 | UMHMNP815577436    | -8.8                     | -8.6 | 1859 | UMHMNP168004862    | -8.2                     | -8.6 | 1914 | UMHMNP395070890    | -8.3                     | -8.6 |
| 1805 | UMHMNP847450731    | -8.4                     | -8.6 | 1860 | UMHMNP171370562    | -8.2                     | -8.6 | 1915 | UMHMNP433717307    | -8.6                     | -8.6 |
| 1806 | UMHMNP865668571    | -9.1                     | -8.6 | 1861 | UMHMNP196868016    | -9.1                     | -8.6 | 1916 | UMHMNP51847837     | -9.3                     | -8.6 |
| 1807 | UMHMNP121819703    | -8.6                     | -8.6 | 1862 | UMHMNP220866397    | -9.3                     | -8.6 | 1917 | UMHMNP64907262     | -8.1                     | -8.6 |
| 1808 | UMHMNP135446843    | -9.6                     | -8.6 | 1863 | UMHMNP247154638    | -9.0                     | -8.6 | 1918 | UMHMNP94773189     | -8.4                     | -8.6 |
| 1809 | UMHMNP159001975    | -8.5                     | -8.6 | 1864 | UMHMNP74323447     | -9.5                     | -8.6 | 1919 | UMHMNP10245815     | -10.1                    | -8.5 |
| 1810 | UMHMNP1778025      | -8.3                     | -8.6 | 1865 | UMHMNP74847099     | -8.4                     | -8.6 | 1920 | UMHMNP108695803    | -8.8                     | -8.5 |
| 1811 | UMHMNP190451059    | -8.1                     | -8.6 | 1866 | UMHMNP813436407    | -9.4                     | -8.6 | 1921 | UMHMNP111621375    | -8.8                     | -8.5 |
| 1812 | UMHMNP213547263    | -8.5                     | -8.6 | 1867 | UMHMNP83542169     | -8.1                     | -8.6 | 1922 | UMHMNP126060091    | -8.2                     | -8.5 |
| 1813 | UMHMNP217478734    | -9.4                     | -8.6 | 1868 | UMHMNP90996240     | -8.3                     | -8.6 | 1923 | UMHMNP130799358    | -10.9                    | -8.5 |
| 1814 | UMHMNP220304552    | -8.3                     | -8.6 | 1869 | UMHMNP114742722    | -9.4                     | -8.6 | 1924 | UMHMNP189748832    | -9.4                     | -8.5 |
| 1815 | UMHMNP257904942    | -9.4                     | -8.6 | 1870 | UMHMNP13327770     | -8.8                     | -8.6 | 1925 | UMHMNP215854061    | -8.8                     | -8.5 |
| 1816 | UMHMNP257904953    | -8.4                     | -8.6 | 1871 | UMHMNP221160801    | -10.8                    | -8.6 | 1926 | UMHMNP272118055    | -9.6                     | -8.5 |
| 1817 | UMHMNP329050240    | -8.3                     | -8.6 | 1872 | UMHMNP661476659    | -8.1                     | -8.6 | 1927 | UMHMNP481196       | -8.4                     | -8.5 |
| 1818 | UMHMNP439132044    | -8.6                     | -8.6 | 1873 | UMHMNP80387902     | -8.4                     | -8.6 | 1928 | UMHMNP50657313     | -9.0                     | -8.5 |
| 1819 | UMHMNP67067816     | -8.8                     | -8.6 | 1874 | UMHMNP97190426     | -9.0                     | -8.6 | 1929 | UMHMNP63250215     | -8.4                     | -8.5 |
| 1820 | UMHMNP81306594     | -11.4                    | -8.6 | 1875 | UMHMNP114250_t0    | -8.1                     | -8.6 | 1930 | UMHMNP74608632     | -9.7                     | -8.5 |
| 1821 | UMHMNP113830958    | -9.7                     | -8.6 | 1876 | UMHMNP116407262    | -8.2                     | -8.6 | 1931 | UMHMNP79206716     | -8.3                     | -8.5 |
| 1822 | UMHMNP114582728    | -9.4                     | -8.6 | 1877 | UMHMNP121350990    | -8.7                     | -8.6 | 1932 | UMHMNP848132387    | -8.2                     | -8.5 |
| 1823 | UMHMNP120314150    | -8.4                     | -8.6 | 1878 | UMHMNP174792020    | -9.2                     | -8.6 | 1933 | UMHMNP89837990     | -9.3                     | -8.5 |
| 1824 | UMHMNP133943507    | -8.7                     | -8.6 | 1879 | UMHMNP183006793    | -8.7                     | -8.6 | 1934 | UMHMNP90996239     | -8.2                     | -8.5 |
| 1825 | UMHMNP168113675    | -8.7                     | -8.6 | 1880 | UMHMNP200273661    | -9.4                     | -8.6 | 1935 | UMHMNP95062376     | -8.6                     | -8.5 |

Table S1. Continued.

| No.  | Compound Name/Code | Docking Score (kcal/mol) |      | No.  | Compound Name/Code | Docking Score (kcal/mol) |      | No.  | Compound Name/Code | Docking Score (kcal/mol) |      |
|------|--------------------|--------------------------|------|------|--------------------|--------------------------|------|------|--------------------|--------------------------|------|
|      |                    | Fast                     | Mod. |      |                    | Fast                     | Mod. |      |                    | Fast                     | Mod. |
| 1936 | UMHMNP104855223    | -8.3                     | -8.5 | 1991 | UMHMNP118984477    | -8.4                     | -8.5 | 2046 | UMHMNP104993104    | -8.2                     | -8.5 |
| 1937 | UMHMNP106009807    | -8.0                     | -8.5 | 1992 | UMHMNP128049149    | -8.0                     | -8.5 | 2047 | UMHMNP110271211    | -8.1                     | -8.5 |
| 1938 | UMHMNP140866199    | -8.2                     | -8.5 | 1993 | UMHMNP149864700    | -8.7                     | -8.5 | 2048 | UMHMNP143380409    | -9.0                     | -8.5 |
| 1939 | UMHMNP162830242    | -8.5                     | -8.5 | 1994 | UMHMNP154071702    | -8.9                     | -8.5 | 2049 | UMHMNP151232836    | -8.7                     | -8.5 |
| 1940 | UMHMNP21321959     | -8.1                     | -8.5 | 1995 | UMHMNP194856423    | -8.6                     | -8.5 | 2050 | UMHMNP157232592    | -8.6                     | -8.5 |
| 1941 | UMHMNP63216217     | -9.4                     | -8.5 | 1996 | UMHMNP21072639     | -9.0                     | -8.5 | 2051 | UMHMNP174232350    | -8.8                     | -8.5 |
| 1942 | UMHMNP693790817    | -8.9                     | -8.5 | 1997 | UMHMNP65166021     | -8.7                     | -8.5 | 2052 | UMHMNP182806093    | -9.8                     | -8.5 |
| 1943 | UMHMNP74145736     | -8.9                     | -8.5 | 1998 | UMHMNP66879865     | -8.7                     | -8.5 | 2053 | UMHMNP18964539     | -8.9                     | -8.5 |
| 1944 | UMHMNP76520520     | -10.4                    | -8.5 | 1999 | UMHMNP78285957     | -8.1                     | -8.5 | 2054 | UMHMNP676271844    | -10.1                    | -8.5 |
| 1945 | UMHMNP80246248     | -9.9                     | -8.5 | 2000 | UMHMNP98112415     | -8.2                     | -8.5 | 2055 | UMHMNP6853992      | -8.9                     | -8.5 |
| 1946 | UMHMNP80860533     | -8.4                     | -8.5 | 2001 | UMHMNP104311708    | -8.1                     | -8.5 | 2056 | UMHMNP73538564     | -9.4                     | -8.5 |
| 1947 | UMHMNP849904887    | -8.7                     | -8.5 | 2002 | UMHMNP120152003    | -8.8                     | -8.5 | 2057 | UMHMNP89210139     | -8.7                     | -8.5 |
| 1948 | UMHMNP104992941    | -8.3                     | -8.5 | 2003 | UMHMNP165815792    | -8.1                     | -8.5 | 2058 | UMHMNP97190437     | -10.4                    | -8.5 |
| 1949 | UMHMNP128364307    | -9.9                     | -8.5 | 2004 | UMHMNP168422397    | -9.6                     | -8.5 | 2059 | UMHMNP116314       | -8.2                     | -8.4 |
| 1950 | UMHMNP138355074    | -8.1                     | -8.5 | 2005 | UMHMNP215035828    | -8.6                     | -8.5 | 2060 | UMHMNP116339969    | -10.3                    | -8.4 |
| 1951 | UMHMNP141394710    | -8.2                     | -8.5 | 2006 | UMHMNP221012788    | -9.2                     | -8.5 | 2061 | UMHMNP116407193    | -9.3                     | -8.4 |
| 1952 | UMHMNP149633567    | -9.9                     | -8.5 | 2007 | UMHMNP359415660    | -8.5                     | -8.5 | 2062 | UMHMNP123314227    | -8.9                     | -8.4 |
| 1953 | UMHMNP161187786    | -10.1                    | -8.5 | 2008 | UMHMNP39707556     | -8.7                     | -8.5 | 2063 | UMHMNP139083220    | -8.8                     | -8.4 |
| 1954 | UMHMNP211239495    | -8.7                     | -8.5 | 2009 | UMHMNP471278736    | -8.2                     | -8.5 | 2064 | UMHMNP146471854    | -8.4                     | -8.4 |
| 1955 | UMHMNP222960896    | -8.9                     | -8.5 | 2010 | UMHMNP475111809    | -8.9                     | -8.5 | 2065 | UMHMNP149155215    | -9.0                     | -8.4 |
| 1956 | UMHMNP4351557      | -9.1                     | -8.5 | 2011 | UMHMNP625835236    | -9.2                     | -8.5 | 2066 | UMHMNP159934153    | -8.5                     | -8.4 |
| 1957 | UMHMNP749216475    | -8.6                     | -8.5 | 2012 | UMHMNP109802177    | -9.3                     | -8.5 | 2067 | UMHMNP180603649    | -8.7                     | -8.4 |
| 1958 | UMHMNP781646875    | -8.5                     | -8.5 | 2013 | UMHMNP123492400    | -8.1                     | -8.5 | 2068 | UMHMNP200273672    | -8.3                     | -8.4 |
| 1959 | UMHMNP862588816    | -8.6                     | -8.5 | 2014 | UMHMNP136196651    | -8.6                     | -8.5 | 2069 | UMHMNP612089857    | -9.6                     | -8.4 |
| 1960 | UMHMNP99457984     | -8.4                     | -8.5 | 2015 | UMHMNP139953336    | -10.3                    | -8.5 | 2070 | UMHMNP63814539     | -8.9                     | -8.4 |
| 1961 | UMHMNP135048587    | -8.1                     | -8.5 | 2016 | UMHMNP141394721    | -8.1                     | -8.5 | 2071 | UMHMNP706784749    | -8.3                     | -8.4 |
| 1962 | UMHMNP139765289    | -8.8                     | -8.5 | 2017 | UMHMNP155112688    | -8.1                     | -8.5 | 2072 | UMHMNP70941332     | -8.3                     | -8.4 |
| 1963 | UMHMNP143592250    | -8.5                     | -8.5 | 2018 | UMHMNP199600389    | -9.0                     | -8.5 | 2073 | UMHMNP733753156    | -8.1                     | -8.4 |
| 1964 | UMHMNP145398614    | -9.0                     | -8.5 | 2019 | UMHMNP23637312     | -10.0                    | -8.5 | 2074 | UMHMNP75266238     | -8.2                     | -8.4 |
| 1965 | UMHMNP149378585    | -11.3                    | -8.5 | 2020 | UMHMNP366479041    | -8.7                     | -8.5 | 2075 | UMHMNP77209257     | -8.4                     | -8.4 |
| 1966 | UMHMNP15361407     | -8.4                     | -8.5 | 2021 | UMHMNP53823044     | -8.1                     | -8.5 | 2076 | UMHMNP863116487    | -9.2                     | -8.4 |
| 1967 | UMHMNP219517483    | -9.3                     | -8.5 | 2022 | UMHMNP60422891     | -8.7                     | -8.5 | 2077 | UMHMNP133883133    | -8.1                     | -8.4 |
| 1968 | UMHMNP24587415     | -8.6                     | -8.5 | 2023 | UMHMNP648883323    | -8.6                     | -8.5 | 2078 | UMHMNP138264503    | -8.4                     | -8.4 |
| 1969 | UMHMNP255623375    | -8.9                     | -8.5 | 2024 | UMHMNP681145471    | -9.1                     | -8.5 | 2079 | UMHMNP139765392    | -9.7                     | -8.4 |
| 1970 | UMHMNP693790806    | -8.9                     | -8.5 | 2025 | UMHMNP73436449     | -9.5                     | -8.5 | 2080 | UMHMNP147217218    | -8.5                     | -8.4 |
| 1971 | UMHMNP83704114     | -8.3                     | -8.5 | 2026 | UMHMNP111149872    | -8.9                     | -8.5 | 2081 | UMHMNP184430000    | -8.4                     | -8.4 |
| 1972 | UMHMNP91893833     | -8.6                     | -8.5 | 2027 | UMHMNP111863673    | -8.6                     | -8.5 | 2082 | UMHMNP192187670    | -8.3                     | -8.4 |
| 1973 | UMHMNP95062387     | -9.6                     | -8.5 | 2028 | UMHMNP120853136    | -8.6                     | -8.5 | 2083 | UMHMNP201800591    | -8.7                     | -8.4 |
| 1974 | UMHMNP97190346     | -8.9                     | -8.5 | 2029 | UMHMNP136762953    | -8.4                     | -8.5 | 2084 | UMHMNP225779771    | -9.1                     | -8.4 |
| 1975 | UMHMNP117472976    | -9.0                     | -8.5 | 2030 | UMHMNP139579274    | -8.3                     | -8.5 | 2085 | UMHMNP247115282    | -8.3                     | -8.4 |
| 1976 | UMHMNP117694992    | -8.2                     | -8.5 | 2031 | UMHMNP142780492    | -10.1                    | -8.5 | 2086 | UMHMNP288858560    | -8.8                     | -8.4 |
| 1977 | UMHMNP133530242    | -9.8                     | -8.5 | 2032 | UMHMNP142979348    | -8.9                     | -8.5 | 2087 | UMHMNP3633725      | -9.9                     | -8.4 |
| 1978 | UMHMNP144027781    | -8.3                     | -8.5 | 2033 | UMHMNP143380669    | -10.1                    | -8.5 | 2088 | UMHMNP445430659    | -8.8                     | -8.4 |
| 1979 | UMHMNP146488644    | -9.1                     | -8.5 | 2034 | UMHMNP143592227    | -10.0                    | -8.5 | 2089 | UMHMNP4657583      | -8.4                     | -8.4 |
| 1980 | UMHMNP146555820    | -8.1                     | -8.5 | 2035 | UMHMNP16852521     | -8.2                     | -8.5 | 2090 | UMHMNP676154293    | -8.1                     | -8.4 |
| 1981 | UMHMNP212069517    | -8.5                     | -8.5 | 2036 | UMHMNP205382236    | -8.6                     | -8.5 | 2091 | UMHMNP681145460    | -8.7                     | -8.4 |
| 1982 | UMHMNP306971108    | -8.2                     | -8.5 | 2037 | UMHMNP237749847    | -8.2                     | -8.5 | 2092 | UMHMNP697299211    | -8.2                     | -8.4 |
| 1983 | UMHMNP351198088    | -8.2                     | -8.5 | 2038 | UMHMNP334491268    | -8.2                     | -8.5 | 2093 | UMHMNP97190460     | -10.0                    | -8.4 |
| 1984 | UMHMNP35339710     | -8.4                     | -8.5 | 2039 | UMHMNP614748639    | -8.2                     | -8.5 | 2094 | UMHMNP124689641    | -9.2                     | -8.4 |
| 1985 | UMHMNP35498670     | -8.9                     | -8.5 | 2040 | UMHMNP62820342     | -9.9                     | -8.5 | 2095 | UMHMNP12771721     | -9.0                     | -8.4 |
| 1986 | UMHMNP51847826     | -9.8                     | -8.5 | 2041 | UMHMNP664987126    | -9.9                     | -8.5 | 2096 | UMHMNP129704832    | -8.8                     | -8.4 |
| 1987 | UMHMNP61897889     | -8.1                     | -8.5 | 2042 | UMHMNP69672679     | -8.1                     | -8.5 | 2097 | UMHMNP139579296    | -8.6                     | -8.4 |
| 1988 | UMHMNP61949675     | -9.0                     | -8.5 | 2043 | UMHMNP75578653     | -9.4                     | -8.5 | 2098 | UMHMNP141672062    | -8.6                     | -8.4 |
| 1989 | UMHMNP62820331     | -9.5                     | -8.5 | 2044 | UMHMNP81575760     | -9.3                     | -8.5 | 2099 | UMHMNP144967851    | -8.9                     | -8.4 |
| 1990 | UMHMNP74185094     | -9.7                     | -8.5 | 2045 | UMHMNP876756579    | -8.4                     | -8.5 | 2100 | UMHMNP216770364    | -8.6                     | -8.4 |

Table S1. Continued.

| No.  | Compound Name/Code | Docking Score (kcal/mol) |      | No.  | Compound Name/Code | Docking Score (kcal/mol) |      | No.  | Compound Name/Code | Docking Score (kcal/mol) |      |
|------|--------------------|--------------------------|------|------|--------------------|--------------------------|------|------|--------------------|--------------------------|------|
|      |                    | Fast                     | Mod. |      |                    | Fast                     | Mod. |      |                    | Fast                     | Mod. |
| 2101 | UMHMNP225779748    | -8.5                     | -8.4 | 2156 | UMHMNP105372814    | -9.2                     | -8.4 | 2211 | UMHMNP143572194    | -9.5                     | -8.4 |
| 2102 | UMHMNP33300026     | -8.2                     | -8.4 | 2157 | UMHMNP133056652    | -8.6                     | -8.4 | 2212 | UMHMNP157000776    | -9.5                     | -8.4 |
| 2103 | UMHMNP352674330    | -8.1                     | -8.4 | 2158 | UMHMNP134985061    | -8.1                     | -8.4 | 2213 | UMHMNP250147547    | -8.7                     | -8.4 |
| 2104 | UMHMNP6147439      | -10.4                    | -8.4 | 2159 | UMHMNP151890890    | -8.3                     | -8.4 | 2214 | UMHMNP35454945     | -9.7                     | -8.4 |
| 2105 | UMHMNP69819825     | -8.3                     | -8.4 | 2160 | UMHMNP157622521    | -8.3                     | -8.4 | 2215 | UMHMNP41336656     | -9.3                     | -8.4 |
| 2106 | UMHMNP74145725     | -8.4                     | -8.4 | 2161 | UMHMNP158200103    | -9.5                     | -8.4 | 2216 | UMHMNP425381277    | -8.3                     | -8.4 |
| 2107 | UMHMNP882524927    | -8.4                     | -8.4 | 2162 | UMHMNP287101637    | -8.2                     | -8.4 | 2217 | UMHMNP452956751    | -8.8                     | -8.4 |
| 2108 | UMHMNP99631239     | -8.5                     | -8.4 | 2163 | UMHMNP52498938     | -9.0                     | -8.4 | 2218 | UMHMNP53402189     | -8.9                     | -8.4 |
| 2109 | UMHMNP109152401    | -9.2                     | -8.4 | 2164 | UMHMNP58220        | -9.2                     | -8.4 | 2219 | UMHMNP54602163     | -9.8                     | -8.4 |
| 2110 | UMHMNP123498022    | -9.0                     | -8.4 | 2165 | UMHMNP65556583     | -8.6                     | -8.4 | 2220 | UMHMNP70206916     | -8.5                     | -8.4 |
| 2111 | UMHMNP138264489    | -8.2                     | -8.4 | 2166 | UMHMNP67528341     | -8.6                     | -8.4 | 2221 | UMHMNP799808369    | -8.7                     | -8.4 |
| 2112 | UMHMNP147217194    | -8.8                     | -8.4 | 2167 | UMHMNP746655958    | -10.2                    | -8.4 | 2222 | UMHMNP852469240    | -9.8                     | -8.4 |
| 2113 | UMHMNP149379260    | -10.4                    | -8.4 | 2168 | UMHMNP777859004    | -9.2                     | -8.4 | 2223 | UMHMNP858950546    | -9.6                     | -8.4 |
| 2114 | UMHMNP178326540    | -9.1                     | -8.4 | 2169 | UMHMNP851369863    | -9.8                     | -8.4 | 2224 | UMHMNP87532330     | -10.8                    | -8.4 |
| 2115 | UMHMNP194856365    | -8.8                     | -8.4 | 2170 | UMHMNP104900665    | -10.0                    | -8.4 | 2225 | UMHMNP97190302     | -8.9                     | -8.4 |
| 2116 | UMHMNP202932147    | -8.3                     | -8.4 | 2171 | UMHMNP106001289    | -8.2                     | -8.4 | 2226 | UMHMNP108335042    | -8.3                     | -8.3 |
| 2117 | UMHMNP211486134    | -10.0                    | -8.4 | 2172 | UMHMNP119770115    | -8.5                     | -8.4 | 2227 | UMHMNP111139696    | -8.4                     | -8.3 |
| 2118 | UMHMNP220866400    | -9.3                     | -8.4 | 2173 | UMHMNP138039335    | -8.2                     | -8.4 | 2228 | UMHMNP114318217    | -8.3                     | -8.3 |
| 2119 | UMHMNP246516370    | -9.7                     | -8.4 | 2174 | UMHMNP147318410    | -8.3                     | -8.4 | 2229 | UMHMNP123483205    | -9.3                     | -8.3 |
| 2120 | UMHMNP338949125    | -8.9                     | -8.4 | 2175 | UMHMNP152517798    | -11.1                    | -8.4 | 2230 | UMHMNP134455939    | -9.4                     | -8.3 |
| 2121 | UMHMNP719285026    | -9.4                     | -8.4 | 2176 | UMHMNP153660232    | -8.1                     | -8.4 | 2231 | UMHMNP145427709    | -8.5                     | -8.3 |
| 2122 | UMHMNP78798080     | -8.7                     | -8.4 | 2177 | UMHMNP157403322    | -9.0                     | -8.4 | 2232 | UMHMNP175861811    | -8.4                     | -8.3 |
| 2123 | UMHMNP81575113     | -9.0                     | -8.4 | 2178 | UMHMNP17942084     | -9.0                     | -8.4 | 2233 | UMHMNP19588375     | -8.8                     | -8.3 |
| 2124 | UMHMNP84323273     | -9.1                     | -8.4 | 2179 | UMHMNP209969391    | -9.5                     | -8.4 | 2234 | UMHMNP28032544     | -8.2                     | -8.3 |
| 2125 | UMHMNP117569434    | -8.3                     | -8.4 | 2180 | UMHMNP220924516    | -9.1                     | -8.4 | 2235 | UMHMNP39707545     | -8.2                     | -8.3 |
| 2126 | UMHMNP132342746    | -8.2                     | -8.4 | 2181 | UMHMNP245511346    | -8.5                     | -8.4 | 2236 | UMHMNP52239686     | -8.3                     | -8.3 |
| 2127 | UMHMNP134029451    | -9.8                     | -8.4 | 2182 | UMHMNP325691336    | -9.0                     | -8.4 | 2237 | UMHMNP96627359     | -8.7                     | -8.3 |
| 2128 | UMHMNP135474098    | -8.2                     | -8.4 | 2183 | UMHMNP359415706    | -8.3                     | -8.4 | 2238 | UMHMNP106463756    | -9.0                     | -8.3 |
| 2129 | UMHMNP144398243    | -8.7                     | -8.4 | 2184 | UMHMNP6094355      | -9.8                     | -8.4 | 2239 | UMHMNP114719572    | -9.5                     | -8.3 |
| 2130 | UMHMNP163496262    | -9.1                     | -8.4 | 2185 | UMHMNP61515262     | -8.4                     | -8.4 | 2240 | UMHMNP117021053    | -8.3                     | -8.3 |
| 2131 | UMHMNP179900982    | -8.3                     | -8.4 | 2186 | UMHMNP84473347     | -8.9                     | -8.4 | 2241 | UMHMNP157207891    | -8.1                     | -8.3 |
| 2132 | UMHMNP22465641     | -9.9                     | -8.4 | 2187 | UMHMNP858950524    | -8.1                     | -8.4 | 2242 | UMHMNP208708229    | -9.1                     | -8.3 |
| 2133 | UMHMNP25612593     | -9.9                     | -8.4 | 2188 | UMHMNP866403772    | -9.6                     | -8.4 | 2243 | UMHMNP64687838     | -8.3                     | -8.3 |
| 2134 | UMHMNP329050206    | -8.1                     | -8.4 | 2189 | UMHMNP890028316    | -8.8                     | -8.4 | 2244 | UMHMNP78697560     | -8.9                     | -8.3 |
| 2135 | UMHMNP3836019      | -9.2                     | -8.4 | 2190 | UMHMNP95513669     | -8.8                     | -8.4 | 2245 | UMHMNP89837989     | -9.9                     | -8.3 |
| 2136 | UMHMNP38623960     | -8.7                     | -8.4 | 2191 | UMHMNP103538552    | -8.5                     | -8.4 | 2246 | UMHMNP122271414    | -9.1                     | -8.3 |
| 2137 | UMHMNP51231277     | -8.3                     | -8.4 | 2192 | UMHMNP116079573    | -10.4                    | -8.4 | 2247 | UMHMNP133883097    | -8.3                     | -8.3 |
| 2138 | UMHMNP566289       | -8.2                     | -8.4 | 2193 | UMHMNP123116030    | -8.7                     | -8.4 | 2248 | UMHMNP145038568    | -8.3                     | -8.3 |
| 2139 | UMHMNP63015894     | -8.3                     | -8.4 | 2194 | UMHMNP129257938    | -10.0                    | -8.4 | 2249 | UMHMNP149415827    | -8.1                     | -8.3 |
| 2140 | UMHMNP72241328     | -8.4                     | -8.4 | 2195 | UMHMNP132618689    | -9.3                     | -8.4 | 2250 | UMHMNP174286170    | -8.3                     | -8.3 |
| 2141 | UMHMNP123231470    | -8.7                     | -8.4 | 2196 | UMHMNP146555819    | -8.9                     | -8.4 | 2251 | UMHMNP216973078    | -9.3                     | -8.3 |
| 2142 | UMHMNP125034084    | -9.5                     | -8.4 | 2197 | UMHMNP178176755    | -8.0                     | -8.4 | 2252 | UMHMNP267407249    | -9.5                     | -8.3 |
| 2143 | UMHMNP152833595    | -8.3                     | -8.4 | 2198 | UMHMNP182806128    | -9.5                     | -8.4 | 2253 | UMHMNP302324590    | -9.4                     | -8.3 |
| 2144 | UMHMNP321847114    | -9.7                     | -8.4 | 2199 | UMHMNP198481991    | -8.3                     | -8.4 | 2254 | UMHMNP5255152      | -9.2                     | -8.3 |
| 2145 | UMHMNP448264640    | -8.4                     | -8.4 | 2200 | UMHMNP306971062    | -8.7                     | -8.4 | 2255 | UMHMNP592533874    | -8.5                     | -8.3 |
| 2146 | UMHMNP63555486     | -8.4                     | -8.4 | 2201 | UMHMNP33646796     | -8.1                     | -8.4 | 2256 | UMHMNP66648531     | -8.5                     | -8.3 |
| 2147 | UMHMNP74364106     | -8.4                     | -8.4 | 2202 | UMHMNP393828325    | -8.8                     | -8.4 | 2257 | UMHMNP70214914     | -9.2                     | -8.3 |
| 2148 | UMHMNP76343936     | -8.3                     | -8.4 | 2203 | UMHMNP72016332     | -8.7                     | -8.4 | 2258 | UMHMNP98155170     | -9.1                     | -8.3 |
| 2149 | UMHMNP813436418    | -8.5                     | -8.4 | 2204 | UMHMNP864685949    | -8.3                     | -8.4 | 2259 | UMHMNP107610004    | -9.4                     | -8.3 |
| 2150 | UMHMNP81575022     | -9.2                     | -8.4 | 2205 | UMHMNP88526732     | -8.9                     | -8.4 | 2260 | UMHMNP160324947    | -9.3                     | -8.3 |
| 2151 | UMHMNP83481236     | -8.5                     | -8.4 | 2206 | UMHMNP97560708     | -8.7                     | -8.4 | 2261 | UMHMNP182801623    | -8.4                     | -8.3 |
| 2152 | UMHMNP853236       | -8.6                     | -8.4 | 2207 | UMHMNP102977764    | -9.2                     | -8.4 | 2262 | UMHMNP191480350    | -9.6                     | -8.3 |
| 2153 | UMHMNP86748290     | -8.3                     | -8.4 | 2208 | UMHMNP120853170    | -8.4                     | -8.4 | 2263 | UMHMNP264618180    | -8.6                     | -8.3 |
| 2154 | UMHMNP95513603     | -10.1                    | -8.4 | 2209 | UMHMNP121994501    | -8.7                     | -8.4 | 2264 | UMHMNP487016988    | -8.9                     | -8.3 |
| 2155 | UMHMNP97915907     | -8.6                     | -8.4 | 2210 | UMHMNP134029440    | -9.7                     | -8.4 | 2265 | UMHMNP69672668     | -8.3                     | -8.3 |

Table S1. Continued.

| No.  | Compound Name/Code | Docking Score (kcal/mol) |      | No.  | Compound Name/Code | Docking Score (kcal/mol) |      | No.  | Compound Name/Code | Docking Score (kcal/mol) |      |
|------|--------------------|--------------------------|------|------|--------------------|--------------------------|------|------|--------------------|--------------------------|------|
|      |                    | Fast                     | Mod. |      |                    | Fast                     | Mod. |      |                    | Fast                     | Mod. |
| 2266 | UMHMNP876754766    | -8.3                     | -8.3 | 2321 | UMHMNP112663919    | -9.3                     | -8.3 | 2376 | UMHMNP29478420     | -9.0                     | -8.2 |
| 2267 | UMHMNP95388048     | -10.1                    | -8.3 | 2322 | UMHMNP115178535    | -9.1                     | -8.3 | 2377 | UMHMNP329025152    | -8.3                     | -8.2 |
| 2268 | UMHMNP155944277    | -9.5                     | -8.3 | 2323 | UMHMNP121923975    | -10.1                    | -8.3 | 2378 | UMHMNP349147280    | -9.3                     | -8.2 |
| 2269 | UMHMNP65717897     | -8.0                     | -8.3 | 2324 | UMHMNP125482271    | -8.8                     | -8.3 | 2379 | UMHMNP437651064    | -8.4                     | -8.2 |
| 2270 | UMHMNP70142880     | -8.1                     | -8.3 | 2325 | UMHMNP139220181    | -8.1                     | -8.3 | 2380 | UMHMNP76958673     | -8.3                     | -8.2 |
| 2271 | UMHMNP81275812     | -8.6                     | -8.3 | 2326 | UMHMNP139953325    | -8.4                     | -8.3 | 2381 | UMHMNP85733682     | -8.9                     | -8.2 |
| 2272 | UMHMNP873202176    | -8.9                     | -8.3 | 2327 | UMHMNP142780312    | -8.3                     | -8.3 | 2382 | UMHMNP865668582    | -8.1                     | -8.2 |
| 2273 | UMHMNP90139201     | -9.9                     | -8.3 | 2328 | UMHMNP148000402    | -9.0                     | -8.3 | 2383 | UMHMNP129744247    | -9.0                     | -8.2 |
| 2274 | UMHMNP101968745    | -9.5                     | -8.3 | 2329 | UMHMNP169217372    | -8.3                     | -8.3 | 2384 | UMHMNP130221248    | -9.1                     | -8.2 |
| 2275 | UMHMNP151358473    | -8.5                     | -8.3 | 2330 | UMHMNP186803305    | -8.2                     | -8.3 | 2385 | UMHMNP156953854    | -9.2                     | -8.2 |
| 2276 | UMHMNP156280921    | -10.4                    | -8.3 | 2331 | UMHMNP199439753    | -8.7                     | -8.3 | 2386 | UMHMNP158734259    | -8.9                     | -8.2 |
| 2277 | UMHMNP159934164    | -8.8                     | -8.3 | 2332 | UMHMNP217478723    | -8.6                     | -8.3 | 2387 | UMHMNP194020434    | -8.1                     | -8.2 |
| 2278 | UMHMNP183114887    | -8.1                     | -8.3 | 2333 | UMHMNP32469800     | -8.7                     | -8.3 | 2388 | UMHMNP215440725    | -9.6                     | -8.2 |
| 2279 | UMHMNP223130618    | -8.9                     | -8.3 | 2334 | UMHMNP385793373    | -8.2                     | -8.3 | 2389 | UMHMNP287965279    | -8.5                     | -8.2 |
| 2280 | UMHMNP301842580    | -8.3                     | -8.3 | 2335 | UMHMNP62008111     | -8.4                     | -8.3 | 2390 | UMHMNP77761547     | -8.9                     | -8.2 |
| 2281 | UMHMNP485817616    | -9.0                     | -8.3 | 2336 | UMHMNP70165445     | -8.6                     | -8.3 | 2391 | UMHMNP874359418    | -8.1                     | -8.2 |
| 2282 | UMHMNP615285319    | -8.3                     | -8.3 | 2337 | UMHMNP71751774     | -8.7                     | -8.3 | 2392 | UMHMNP106009909    | -8.6                     | -8.2 |
| 2283 | UMHMNP62504614     | -8.8                     | -8.3 | 2338 | UMHMNP73723407     | -9.2                     | -8.3 | 2393 | UMHMNP123941582    | -8.4                     | -8.2 |
| 2284 | UMHMNP75921903     | -8.2                     | -8.3 | 2339 | UMHMNP77136620     | -9.7                     | -8.3 | 2394 | UMHMNP133293897    | -9.8                     | -8.2 |
| 2285 | UMHMNP761409249    | -8.9                     | -8.3 | 2340 | UMHMNP84164863     | -8.6                     | -8.3 | 2395 | UMHMNP161897638    | -9.2                     | -8.2 |
| 2286 | UMHMNP77394026     | -9.3                     | -8.3 | 2341 | UMHMNP89199917     | -8.3                     | -8.3 | 2396 | UMHMNP175861844    | -8.6                     | -8.2 |
| 2287 | UMHMNP862286724    | -8.3                     | -8.3 | 2342 | UMHMNP102396167    | -10.1                    | -8.2 | 2397 | UMHMNP188558976    | -8.7                     | -8.2 |
| 2288 | UMHMNP876754788    | -9.5                     | -8.3 | 2343 | UMHMNP109894113    | -8.1                     | -8.2 | 2398 | UMHMNP222960909    | -9.0                     | -8.2 |
| 2289 | UMHMNP122876486    | -9.6                     | -8.3 | 2344 | UMHMNP118974020    | -8.2                     | -8.2 | 2399 | UMHMNP244295645    | -8.6                     | -8.2 |
| 2290 | UMHMNP145075010    | -8.1                     | -8.3 | 2345 | UMHMNP137761172    | -8.8                     | -8.2 | 2400 | UMHMNP255830274    | -8.2                     | -8.2 |
| 2291 | UMHMNP189456040    | -8.3                     | -8.3 | 2346 | UMHMNP186144092    | -8.3                     | -8.2 | 2401 | UMHMNP486992272    | -9.1                     | -8.2 |
| 2292 | UMHMNP193816716    | -8.3                     | -8.3 | 2347 | UMHMNP215035817    | -8.5                     | -8.2 | 2402 | UMHMNP549502978    | -8.7                     | -8.2 |
| 2293 | UMHMNP213824307    | -11.3                    | -8.3 | 2348 | UMHMNP329040815    | -8.1                     | -8.2 | 2403 | UMHMNP58735641     | -9.4                     | -8.2 |
| 2294 | UMHMNP247921820    | -8.8                     | -8.3 | 2349 | UMHMNP49759220     | -8.9                     | -8.2 | 2404 | UMHMNP73723394     | -8.1                     | -8.2 |
| 2295 | UMHMNP249731348    | -8.8                     | -8.3 | 2350 | UMHMNP65079494     | -8.6                     | -8.2 | 2405 | UMHMNP88514049     | -8.4                     | -8.2 |
| 2296 | UMHMNP287101648    | -8.7                     | -8.3 | 2351 | UMHMNP67970        | -9.6                     | -8.2 | 2406 | UMHMNP89398130     | -10.1                    | -8.2 |
| 2297 | UMHMNP539824878    | -8.5                     | -8.3 | 2352 | UMHMNP69809365     | -8.8                     | -8.2 | 2407 | UMHMNP122540298    | -8.3                     | -8.2 |
| 2298 | UMHMNP77136835     | -8.9                     | -8.3 | 2353 | UMHMNP78835082     | -9.2                     | -8.2 | 2408 | UMHMNP135048576    | -8.3                     | -8.2 |
| 2299 | UMHMNP781646853    | -8.2                     | -8.3 | 2354 | UMHMNP83995066     | -8.4                     | -8.2 | 2409 | UMHMNP146345735    | -8.4                     | -8.2 |
| 2300 | UMHMNP105708767    | -9.2                     | -8.3 | 2355 | UMHMNP88428879     | -8.8                     | -8.2 | 2410 | UMHMNP174232418    | -9.3                     | -8.2 |
| 2301 | UMHMNP181229196    | -9.5                     | -8.3 | 2356 | UMHMNP105880102    | -8.8                     | -8.2 | 2411 | UMHMNP26612486     | -9.9                     | -8.2 |
| 2302 | UMHMNP314739952    | -8.6                     | -8.3 | 2357 | UMHMNP109894260    | -9.5                     | -8.2 | 2412 | UMHMNP325691461    | -10.0                    | -8.2 |
| 2303 | UMHMNP403805743    | -8.3                     | -8.3 | 2358 | UMHMNP121295112    | -9.5                     | -8.2 | 2413 | UMHMNP852469284    | -8.9                     | -8.2 |
| 2304 | UMHMNP54602152     | -9.3                     | -8.3 | 2359 | UMHMNP125282124    | -8.3                     | -8.2 | 2414 | UMHMNP890041697    | -8.7                     | -8.2 |
| 2305 | UMHMNP62824082     | -8.3                     | -8.3 | 2360 | UMHMNP130799381    | -10.8                    | -8.2 | 2415 | UMHMNP156848689    | -8.6                     | -8.2 |
| 2306 | UMHMNP705279727    | -8.4                     | -8.3 | 2361 | UMHMNP132911536    | -8.1                     | -8.2 | 2416 | UMHMNP191927147    | -9.3                     | -8.2 |
| 2307 | UMHMNP78853028     | -8.9                     | -8.3 | 2362 | UMHMNP148101502    | -8.7                     | -8.2 | 2417 | UMHMNP196403937    | -8.1                     | -8.2 |
| 2308 | UMHMNP100015165    | -8.3                     | -8.3 | 2363 | UMHMNP158930451    | -9.9                     | -8.2 | 2418 | UMHMNP29706965     | -8.7                     | -8.2 |
| 2309 | UMHMNP108787560    | -8.5                     | -8.3 | 2364 | UMHMNP176181876    | -9.0                     | -8.2 | 2419 | UMHMNP310396704    | -8.4                     | -8.2 |
| 2310 | UMHMNP121825421    | -8.6                     | -8.3 | 2365 | UMHMNP180001201    | -8.7                     | -8.2 | 2420 | UMHMNP340156185    | -8.1                     | -8.2 |
| 2311 | UMHMNP125236591    | -8.5                     | -8.3 | 2366 | UMHMNP189514849    | -10.1                    | -8.2 | 2421 | UMHMNP349147291    | -9.1                     | -8.2 |
| 2312 | UMHMNP135820790    | -9.0                     | -8.3 | 2367 | UMHMNP193411744    | -9.4                     | -8.2 | 2422 | UMHMNP813461200    | -9.3                     | -8.2 |
| 2313 | UMHMNP142755075    | -8.8                     | -8.3 | 2368 | UMHMNP39707567     | -8.5                     | -8.2 | 2423 | UMHMNP90468738     | -8.5                     | -8.2 |
| 2314 | UMHMNP166318861    | -9.3                     | -8.3 | 2369 | UMHMNP70497142     | -8.6                     | -8.2 | 2424 | UMHMNP103955755    | -9.9                     | -8.2 |
| 2315 | UMHMNP247115293    | -8.9                     | -8.3 | 2370 | UMHMNP96845555     | -8.6                     | -8.2 | 2425 | UMHMNP116079562    | -8.3                     | -8.2 |
| 2316 | UMHMNP481643496    | -8.2                     | -8.3 | 2371 | UMHMNP97764357     | -8.5                     | -8.2 | 2426 | UMHMNP132244383    | -8.2                     | -8.2 |
| 2317 | UMHMNP648883312    | -8.4                     | -8.3 | 2372 | UMHMNP115890590    | -8.7                     | -8.2 | 2427 | UMHMNP145427732    | -8.1                     | -8.2 |
| 2318 | UMHMNP80388449     | -8.6                     | -8.3 | 2373 | UMHMNP132541845    | -8.4                     | -8.2 | 2428 | UMHMNP149378574    | -9.9                     | -8.2 |
| 2319 | UMHMNP111268645    | -8.5                     | -8.3 | 2374 | UMHMNP144676379    | -9.1                     | -8.2 | 2429 | UMHMNP169181344    | -8.3                     | -8.2 |
| 2320 | UMHMNP112570873    | -8.7                     | -8.3 | 2375 | UMHMNP175861888    | -8.3                     | -8.2 | 2430 | UMHMNP170475135    | -9.0                     | -8.2 |

Table S1. Continued.

| No.  | Compound Name/Code | Docking Score (kcal/mol) |      | No.  | Compound Name/Code | Docking Score (kcal/mol) |      | No.  | Compound Name/Code | Docking Score (kcal/mol) |      |
|------|--------------------|--------------------------|------|------|--------------------|--------------------------|------|------|--------------------|--------------------------|------|
|      |                    | Fast                     | Mod. |      |                    | Fast                     | Mod. |      |                    | Fast                     | Mod. |
| 2431 | UMHMNP244295634    | -8.1                     | -8.2 | 2486 | UMHMNP155885657    | -8.2                     | -8.1 | 2541 | UMHMNP330846929    | -8.6                     | -8.1 |
| 2432 | UMHMNP5996225      | -9.5                     | -8.2 | 2487 | UMHMNP19369643     | -8.5                     | -8.1 | 2542 | UMHMNP80902358     | -8.1                     | -8.1 |
| 2433 | UMHMNP74799567     | -9.1                     | -8.2 | 2488 | UMHMNP259194939    | -9.1                     | -8.1 | 2543 | UMHMNP115952255    | -8.8                     | -8.0 |
| 2434 | UMHMNP871332079    | -8.1                     | -8.2 | 2489 | UMHMNP27975195     | -10.3                    | -8.1 | 2544 | UMHMNP124512454    | -10.4                    | -8.0 |
| 2435 | UMHMNP100814662    | -8.1                     | -8.2 | 2490 | UMHMNP306971142    | -8.2                     | -8.1 | 2545 | UMHMNP132911503    | -9.0                     | -8.0 |
| 2436 | UMHMNP129932805    | -8.8                     | -8.2 | 2491 | UMHMNP481643485    | -9.0                     | -8.1 | 2546 | UMHMNP146396249    | -8.4                     | -8.0 |
| 2437 | UMHMNP145398670    | -8.5                     | -8.2 | 2492 | UMHMNP66082302     | -8.4                     | -8.1 | 2547 | UMHMNP150998995    | -9.2                     | -8.0 |
| 2438 | UMHMNP15979767     | -8.2                     | -8.2 | 2493 | UMHMNP70546644     | -8.9                     | -8.1 | 2548 | UMHMNP157622598    | -9.1                     | -8.0 |
| 2439 | UMHMNP167172852    | -11.1                    | -8.2 | 2494 | UMHMNP88514061     | -9.0                     | -8.1 | 2549 | UMHMNP200437689    | -9.0                     | -8.0 |
| 2440 | UMHMNP171528044    | -8.9                     | -8.2 | 2495 | UMHMNP145398590    | -8.5                     | -8.1 | 2550 | UMHMNP37717025     | -8.6                     | -8.0 |
| 2441 | UMHMNP174630092    | -9.0                     | -8.2 | 2496 | UMHMNP154554902    | -8.3                     | -8.1 | 2551 | UMHMNP58957        | -8.5                     | -8.0 |
| 2442 | UMHMNP176328500    | -8.1                     | -8.2 | 2497 | UMHMNP155850901    | -8.7                     | -8.1 | 2552 | UMHMNP74185038     | -9.5                     | -8.0 |
| 2443 | UMHMNP251907194    | -9.2                     | -8.2 | 2498 | UMHMNP164301308    | -8.3                     | -8.1 | 2553 | UMHMNP74839819     | -8.2                     | -8.0 |
| 2444 | UMHMNP3148092      | -8.5                     | -8.2 | 2499 | UMHMNP433717716    | -8.3                     | -8.1 | 2554 | UMHMNP80388483     | -8.7                     | -8.0 |
| 2445 | UMHMNP57765749     | -8.7                     | -8.2 | 2500 | UMHMNP864685961    | -8.7                     | -8.1 | 2555 | UMHMNP112515410    | -10.4                    | -8.0 |
| 2446 | UMHMNP6055501      | -8.3                     | -8.2 | 2501 | UMHMNP99957252     | -8.3                     | -8.1 | 2556 | UMHMNP113351750    | -8.1                     | -8.0 |
| 2447 | UMHMNP68835916     | -8.1                     | -8.2 | 2502 | UMHMNP114728073    | -8.7                     | -8.1 | 2557 | UMHMNP125236604    | -8.5                     | -8.0 |
| 2448 | UMHMNP75088812     | -9.7                     | -8.2 | 2503 | UMHMNP146555831    | -8.6                     | -8.1 | 2558 | UMHMNP129602137    | -10.0                    | -8.0 |
| 2449 | UMHMNP80322107     | -8.3                     | -8.2 | 2504 | UMHMNP156280943    | -8.7                     | -8.1 | 2559 | UMHMNP184301915    | -8.9                     | -8.0 |
| 2450 | UMHMNP847450742    | -8.6                     | -8.2 | 2505 | UMHMNP159518793    | -8.2                     | -8.1 | 2560 | UMHMNP282118858    | -10.0                    | -8.0 |
| 2451 | UMHMNP861434142    | -8.4                     | -8.2 | 2506 | UMHMNP179669331    | -8.9                     | -8.1 | 2561 | UMHMNP282524623    | -8.8                     | -8.0 |
| 2452 | UMHMNP104387135    | -8.8                     | -8.2 | 2507 | UMHMNP232922235    | -10.0                    | -8.1 | 2562 | UMHMNP33281811     | -9.3                     | -8.0 |
| 2453 | UMHMNP135048554    | -9.0                     | -8.2 | 2508 | UMHMNP460060224    | -9.6                     | -8.1 | 2563 | UMHMNP108907240    | -10.1                    | -8.0 |
| 2454 | UMHMNP157799150    | -8.8                     | -8.2 | 2509 | UMHMNP108605512    | -8.2                     | -8.1 | 2564 | UMHMNP901622268    | -8.8                     | -8.0 |
| 2455 | UMHMNP184305688    | -9.9                     | -8.2 | 2510 | UMHMNP265652991    | -8.6                     | -8.1 | 2565 | UMHMNP102396247    | -8.5                     | -8.0 |
| 2456 | UMHMNP185839218    | -8.7                     | -8.2 | 2511 | UMHMNP478364248    | -9.5                     | -8.1 | 2566 | UMHMNP325691483    | -9.4                     | -8.0 |
| 2457 | UMHMNP193411766    | -9.2                     | -8.2 | 2512 | UMHMNP625413356    | -8.1                     | -8.1 | 2567 | UMHMNP331970059    | -8.6                     | -8.0 |
| 2458 | UMHMNP353796211    | -8.3                     | -8.2 | 2513 | UMHMNP74364117     | -9.8                     | -8.1 | 2568 | UMHMNP124596652    | -8.3                     | -8.0 |
| 2459 | UMHMNP663154572    | -8.4                     | -8.2 | 2514 | UMHMNP76984913     | -8.1                     | -8.1 | 2569 | UMHMNP132621831    | -9.2                     | -8.0 |
| 2460 | UMHMNP116302364    | -8.5                     | -8.1 | 2515 | UMHMNP78173883     | -8.5                     | -8.1 | 2570 | UMHMNP88899610     | -8.7                     | -8.0 |
| 2461 | UMHMNP133401124    | -8.6                     | -8.1 | 2516 | UMHMNP96426925     | -8.3                     | -8.1 | 2571 | UMHMNP141544629    | -9.0                     | -8.0 |
| 2462 | UMHMNP155210529    | -8.9                     | -8.1 | 2517 | UMHMNP110042289    | -8.5                     | -8.1 | 2572 | UMHMNP55826512     | -8.4                     | -8.0 |
| 2463 | UMHMNP165171244    | -8.5                     | -8.1 | 2518 | UMHMNP133883086    | -8.8                     | -8.1 | 2573 | UMHMNP59048816     | -9.0                     | -8.0 |
| 2464 | UMHMNP233607631    | -9.6                     | -8.1 | 2519 | UMHMNP197234198    | -8.6                     | -8.1 | 2574 | UMHMNP132410390    | -8.3                     | -7.9 |
| 2465 | UMHMNP511262       | -8.4                     | -8.1 | 2520 | UMHMNP199165872    | -8.6                     | -8.1 | 2575 | UMHMNP99102406     | -8.2                     | -7.9 |
| 2466 | UMHMNP85754707     | -8.1                     | -8.1 | 2521 | UMHMNP31665324     | -8.4                     | -8.1 | 2576 | UMHMNP126026582    | -8.1                     | -7.9 |
| 2467 | UMHMNP866228946    | -8.1                     | -8.1 | 2522 | UMHMNP62008155     | -8.5                     | -8.1 | 2577 | UMHMNP180001212    | -8.3                     | -7.9 |
| 2468 | UMHMNP113023715    | -8.8                     | -8.1 | 2523 | UMHMNP690627613    | -9.4                     | -8.1 | 2578 | UMHMNP189580083    | -8.9                     | -7.9 |
| 2469 | UMHMNP114763518    | -10.3                    | -8.1 | 2524 | UMHMNP94359656     | -9.4                     | -8.1 | 2579 | UMHMNP200437645    | -9.4                     | -7.9 |
| 2470 | UMHMNP117229411    | -8.5                     | -8.1 | 2525 | UMHMNP120484802    | -8.7                     | -8.1 | 2580 | UMHMNP181034979    | -9.4                     | -7.9 |
| 2471 | UMHMNP119979769    | -8.3                     | -8.1 | 2526 | UMHMNP128700856    | -8.2                     | -8.1 | 2581 | UMHMNP100046035    | -8.8                     | -7.9 |
| 2472 | UMHMNP129744156    | -8.5                     | -8.1 | 2527 | UMHMNP145131       | -8.5                     | -8.1 | 2582 | UMHMNP157002409    | -8.1                     | -7.9 |
| 2473 | UMHMNP135048601    | -9.0                     | -8.1 | 2528 | UMHMNP173485819    | -9.4                     | -8.1 | 2583 | UMHMNP863638102    | -9.1                     | -7.9 |
| 2474 | UMHMNP137571303    | -8.8                     | -8.1 | 2529 | UMHMNP238431760    | -8.9                     | -8.1 | 2584 | UMHMNP68857443     | -8.3                     | -7.9 |
| 2475 | UMHMNP137836658    | -8.3                     | -8.1 | 2530 | UMHMNP356566842    | -8.7                     | -8.1 | 2585 | UMHMNP114076516    | -8.3                     | -7.8 |
| 2476 | UMHMNP192222176    | -9.5                     | -8.1 | 2531 | UMHMNP479201575    | -9.6                     | -8.1 | 2586 | UMHMNP122548043    | -10.2                    | -7.8 |
| 2477 | UMHMNP207918954    | -8.5                     | -8.1 | 2532 | UMHMNP67240431     | -9.0                     | -8.1 | 2587 | UMHMNP189388827    | -8.8                     | -7.8 |
| 2478 | UMHMNP252733407    | -8.8                     | -8.1 | 2533 | UMHMNP68042999     | -8.4                     | -8.1 | 2588 | UMHMNP338949114    | -8.3                     | -7.8 |
| 2479 | UMHMNP73731347     | -8.3                     | -8.1 | 2534 | UMHMNP847450719    | -8.9                     | -8.1 | 2589 | UMHMNP496909763    | -9.2                     | -7.8 |
| 2480 | UMHMNP80442780     | -9.4                     | -8.1 | 2535 | UMHMNP130322246    | -8.6                     | -8.1 | 2590 | UMHMNP106009727    | -8.2                     | -7.8 |
| 2481 | UMHMNP81920185     | -8.2                     | -8.1 | 2536 | UMHMNP250686874    | -8.1                     | -8.1 | 2591 | UMHMNP121379484    | -8.8                     | -7.8 |
| 2482 | UMHMNP890028305    | -9.5                     | -8.1 | 2537 | UMHMNP71302266     | -8.8                     | -8.1 | 2592 | UMHMNP109979160    | -8.2                     | -7.8 |
| 2483 | UMHMNP132160442    | -8.3                     | -8.1 | 2538 | UMHMNP74804038     | -10.0                    | -8.1 | 2593 | UMHMNP180048106    | -8.5                     | -7.8 |
| 2484 | UMHMNP132911467    | -8.3                     | -8.1 | 2539 | UMHMNP114094336    | -9.4                     | -8.1 | 2594 | UMHMNP52665744     | -9.2                     | -7.8 |
| 2485 | UMHMNP136094365    | -8.6                     | -8.1 | 2540 | UMHMNP127875609    | -9.1                     | -8.1 | 2595 | UMHMNP145398681    | -8.4                     | -7.8 |

Table S1. Continued.

| No.  | Compound Name/Code | Docking Score (kcal/mol) |      | No.  | Compound Name/Code | Docking Score (kcal/mol) |      | No.  | Compound Name/Code | Docking Score (kcal/mol) |      |
|------|--------------------|--------------------------|------|------|--------------------|--------------------------|------|------|--------------------|--------------------------|------|
|      |                    | Fast                     | Mod. |      |                    | Fast                     | Mod. |      |                    | Fast                     | Mod. |
| 2596 | UMHMNP405274159    | -8.4                     | -7.8 | 2626 | UMHMNP114216874    | -8.1                     | -7.5 | 2657 | UMHMNP80764198     | -8.1                     | -7.1 |
| 2597 | UMHMNP164727337    | -8.1                     | -7.8 | 2627 | UMHMNP180965257    | -8.8                     | -7.5 | 2658 | UMHMNP96820132     | -9.2                     | -7.0 |
| 2598 | UMHMNP620604413    | -9.6                     | -7.8 | 2628 | UMHMNP132564988    | -8.2                     | -7.4 | 2659 | UMHMNP168482380    | -9.2                     | -7.0 |
| 2599 | UMHMNP95387476     | -8.7                     | -7.8 | 2629 | UMHMNP620604220    | -8.6                     | -7.4 | 2660 | UMHMNP147663783    | -9.0                     | -7.0 |
| 2600 | UMHMNP405283376    | -8.7                     | -7.8 | 2630 | UMHMNP97730988     | -8.5                     | -7.4 | 2661 | UMHMNP115787967    | -8.6                     | -7.0 |
| 2601 | UMHMNP1406662      | -8.1                     | -7.7 | 2632 | UMHMNP856414625    | -9.4                     | -7.4 | 2662 | UMHMNP53755569     | -8.1                     | -7.0 |
| 2602 | UMHMNP174545789    | -8.2                     | -7.7 | 2633 | UMHMNP130829311    | -8.6                     | -7.4 | 2663 | UMHMNP150351238    | -8.6                     | -6.9 |
| 2603 | UMHMNP13394351     | -8.7                     | -7.7 | 2634 | UMHMNP176226576    | -8.7                     | -7.4 | 2664 | UMHMNP126596041    | -8.8                     | -6.9 |
| 2604 | UMHMNP139579310    | -8.2                     | -7.7 | 2635 | UMHMNP196874109    | -8.6                     | -7.4 | 2665 | UMHMNP207683703    | -8.8                     | -6.9 |
| 2605 | UMHMNP90332722     | -8.6                     | -7.7 | 2636 | UMHMNP114216852    | -8.3                     | -7.4 | 2666 | UMHMNP479249304    | -9.4                     | -6.9 |
| 2606 | UMHMNP81254        | -8.8                     | -7.7 | 2637 | UMHMNP115178524    | -8.2                     | -7.4 | 2667 | UMHMNP161897718    | -8.7                     | -6.8 |
| 2607 | UMHMNP81575102     | -8.8                     | -7.7 | 2638 | UMHMNP15979712     | -8.6                     | -7.4 | 2668 | UMHMNP107168605    | -9.3                     | -6.8 |
| 2608 | UMHMNP174232361    | -9.0                     | -7.7 | 2639 | UMHMNP174630081    | -8.8                     | -7.3 | 2669 | UMHMNP152606616    | -8.3                     | -6.8 |
| 2609 | UMHMNP99458045     | -9.3                     | -7.7 | 2640 | UMHMNP227597435    | -8.1                     | -7.3 | 2670 | UMHMNP70363892     | -8.5                     | -6.7 |
| 2610 | UMHMNP170661413    | -9.4                     | -7.7 | 2641 | UMHMNP153212841    | -8.1                     | -7.3 | 2671 | UMHMNP681225956    | -9.0                     | -6.6 |
| 2611 | UMHMNP314740006    | -8.1                     | -7.7 | 2642 | UMHMNP190510862    | -9.5                     | -7.3 | 2672 | UMHMNP115178546    | -8.1                     | -6.6 |
| 2612 | UMHMNP168434239    | -9.3                     | -7.6 | 2643 | UMHMNP130170079    | -10.4                    | -7.3 | 2673 | UMHMNP109152365    | -8.5                     | -6.5 |
| 2613 | UMHMNP107585455    | -8.8                     | -7.6 | 2644 | UMHMNP97068309     | -8.3                     | -7.3 | 2674 | UMHMNP799246869    | -9.3                     | -6.4 |
| 2614 | UMHMNP160581135    | -8.2                     | -7.6 | 2645 | UMHMNP160638120    | -8.5                     | -7.3 | 2675 | UMHMNP212502879    | -8.4                     | -6.4 |
| 2615 | UMHMNP136734935    | -8.2                     | -7.6 | 2646 | UMHMNP108663770    | -8.4                     | -7.2 | 2676 | UMHMNP77136631     | -9.1                     | -6.4 |
| 2616 | UMHMNP92279920     | -8.3                     | -7.6 | 2647 | UMHMNP205323144    | -8.4                     | -7.2 | 2677 | UMHMNP856414589    | -8.8                     | -6.3 |
| 2617 | UMHMNP148022382    | -9.1                     | -7.6 | 2648 | UMHMNP75872683     | -8.6                     | -7.2 | 2678 | UMHMNP383898064    | -9.8                     | -6.3 |
| 2618 | UMHMNP105064344    | -8.9                     | -7.6 | 2649 | UMHMNP188405187    | -8.6                     | -7.2 | 2679 | UMHMNP266352367    | -8.8                     | -6.2 |
| 2619 | UMHMNP123167011    | -8.3                     | -7.6 | 2650 | UMHMNP168075136    | -9.0                     | -7.2 | 2680 | UMHMNP102209778    | -8.6                     | -6.1 |
| 2620 | UMHMNP20298866     | -9.0                     | -7.6 | 2651 | UMHMNP135531805    | -8.5                     | -7.2 | 2681 | UMHMNP126675523    | -10.2                    | -6.0 |
| 2621 | UMHMNP163318794    | -8.5                     | -7.5 | 2652 | UMHMNP136707692    | -9.9                     | -7.2 | 2682 | UMHMNP168433929    | -8.9                     | -5.3 |
| 2622 | UMHMNP179985616    | -8.1                     | -7.5 | 2653 | UMHMNP28979295     | -8.8                     | -7.1 | 2683 | UMHMNP189819190    | -8.0                     | -5.3 |
| 2623 | UMHMNP224784478    | -8.6                     | -7.5 | 2654 | UMHMNP111466672    | -9.7                     | -7.1 | 2684 | UMHMNP681225967    | -8.7                     | -5.0 |
| 2624 | UMHMNP125111695    | -11.2                    | -7.5 | 2655 | UMHMNP13408565     | -8.6                     | -7.1 | 2685 | UMHMNP697299200    | -8.1                     | -5.0 |
| 2625 | UMHMNP128269692    | -8.9                     | -7.5 | 2656 | UMHMNP147663794    | -8.3                     | -7.1 | 2686 | UMHMNP73573178     | -8.1                     | -5.0 |

<sup>a</sup>Data sorted according to stage II docking scores.

**Table S2.** Estimated fast, moderate, and expensive docking scores for XF7 and the top 1092 potent MNP's compounds within the 3CL<sup>pro</sup> binding pocket.

| No. | Compound Name/Code | Docking Score (kcal/mol) |          |           | No. | Compound Name/Code | Docking Score (kcal/mol) |          |           |
|-----|--------------------|--------------------------|----------|-----------|-----|--------------------|--------------------------|----------|-----------|
|     |                    | Fast                     | Moderate | Expensive |     |                    | Fast                     | Moderate | Expensive |
|     | XF7                | -8.1                     | -9.2     | -9.5      | 55  | UMHMNP143049165    | -8.9                     | -10.6    | -11.0     |
| 1   | UMHMNP1403367      | -11.7                    | -12.2    | -13.4     | 56  | UMHMNP143049143    | -8.4                     | -9.3     | -11.0     |
| 2   | UMHMNP101691127    | -11.4                    | -12.1    | -12.3     | 57  | UMHMNP58670636     | -9.5                     | -11.0    | -11.0     |
| 3   | UMHMNP791849666    | -11.4                    | -11.9    | -12.3     | 58  | UMHMNP6673661      | -9.6                     | -10.9    | -10.9     |
| 4   | UMHMNP14984668     | -11.3                    | -11.7    | -12.2     | 59  | UMHMNP161470231    | -8.9                     | -10.6    | -10.9     |
| 5   | UMHMNP143621754    | -11.3                    | -11.7    | -12.2     | 60  | UMHMNP890041722    | -10.8                    | -10.9    | -10.9     |
| 6   | UMHMNP148839036    | -11.3                    | -11.6    | -11.8     | 61  | UMHMNP171674923    | -8.9                     | -10.8    | -10.9     |
| 7   | UMHMNP133056072    | -11.3                    | -11.6    | -11.7     | 62  | UMHMNP125329091    | -10.9                    | -9.9     | -10.9     |
| 8   | UMHMNP386274857    | -11.3                    | -11.6    | -11.7     | 63  | UMHMNP174630070    | -10.9                    | -11.0    | -10.9     |
| 9   | UMHMNP133056094    | -11.2                    | -11.5    | -11.5     | 64  | UMHMNP131467000    | -10.7                    | -10.8    | -10.8     |
| 10  | UMHMNP26195584     | -11.1                    | -11.5    | -11.5     | 65  | UMHMNP221163311    | -9.6                     | -10.5    | -10.8     |
| 11  | UMHMNP874383707    | -11.1                    | -11.5    | -11.4     | 66  | UMHMNP139765370    | -8.1                     | -10.7    | -10.8     |
| 12  | UMHMNP221163300    | -11.1                    | -11.4    | -11.4     | 67  | UMHMNP86708329     | -10.6                    | -10.7    | -10.8     |
| 13  | UMHMNP109152387    | -11.1                    | -11.4    | -11.4     | 68  | UMHMNP151606405    | -9.4                     | -9.8     | -10.8     |
| 14  | UMHMNP156953912    | -11.1                    | -11.4    | -11.4     | 69  | UMHMNP151078921    | -8.8                     | -10.7    | -10.8     |
| 15  | UMHMNP5035303      | -11.0                    | -11.4    | -11.4     | 70  | UMHMNP272458330    | -9.2                     | -9.3     | -10.7     |
| 16  | UMHMNP706784727    | -10.9                    | -11.3    | -11.4     | 71  | UMHMNP272458341    | -10.0                    | -10.3    | -10.7     |
| 17  | UMHMNP116407160    | -8.7                     | -9.5     | -11.3     | 72  | UMHMNP64421201     | -8.8                     | -9.5     | -10.7     |
| 18  | UMHMNP100942743    | -8.8                     | -11.2    | -11.3     | 73  | UMHMNP162830231    | -8.8                     | -9.3     | -10.7     |
| 19  | UMHMNP100942754    | -9.1                     | -10.7    | -11.3     | 74  | UMHMNP64548169     | -9.3                     | -9.5     | -10.7     |
| 20  | UMHMNP105404840    | -10.0                    | -10.1    | -11.3     | 75  | UMHMNP70139569     | -8.2                     | -9.3     | -10.7     |
| 21  | UMHMNP131466972    | -8.2                     | -9.3     | -11.3     | 76  | UMHMNP244157946    | -8.6                     | -9.7     | -10.7     |
| 22  | UMHMNP147362376    | -8.3                     | -9.3     | -11.3     | 77  | UMHMNP41410586     | -8.4                     | -9.8     | -10.7     |
| 23  | UMHMNP149444928    | -9.1                     | -9.4     | -11.3     | 78  | UMHMNP2497747      | -9.3                     | -9.3     | -10.7     |
| 24  | UMHMNP149764341    | -8.9                     | -9.6     | -11.3     | 79  | UMHMNP852872925    | -8.4                     | -9.7     | -10.7     |
| 25  | UMHMNP150050138    | -10.7                    | -10.7    | -11.3     | 80  | UMHMNP116302386    | -9.4                     | -9.5     | -10.7     |
| 26  | UMHMNP153212852    | -8.4                     | -9.7     | -11.3     | 81  | UMHMNP124689652    | -8.9                     | -9.4     | -10.7     |
| 27  | UMHMNP154205182    | -9.9                     | -11.2    | -11.3     | 82  | UMHMNP4030926      | -8.8                     | -9.3     | -10.7     |
| 28  | UMHMNP157207915    | -9.2                     | -10.8    | -11.3     | 83  | UMHMNP351443759    | -8.8                     | -9.9     | -10.7     |
| 29  | UMHMNP162830264    | -9.5                     | -10.4    | -11.3     | 84  | UMHMNP74185049     | -10.0                    | -10.1    | -10.6     |
| 30  | UMHMNP167172987    | -8.4                     | -9.5     | -11.3     | 85  | UMHMNP152110093    | -10.2                    | -9.3     | -10.6     |
| 31  | UMHMNP22033870     | -8.6                     | -9.7     | -11.3     | 86  | UMHMNP165815816    | -8.6                     | -9.8     | -10.6     |
| 32  | UMHMNP221169740    | -8.4                     | -9.6     | -11.3     | 87  | UMHMNP444987637    | -8.3                     | -9.9     | -10.6     |
| 33  | UMHMNP76915247     | -9.6                     | -9.7     | -11.3     | 88  | UMHMNP6673683      | -9.5                     | -9.7     | -10.6     |
| 34  | UMHMNP823808555    | -8.4                     | -10.1    | -11.3     | 89  | UMHMNP745075278    | -9.9                     | -10.0    | -10.6     |
| 35  | UMHMNP120685112    | -8.2                     | -11.0    | -11.3     | 90  | UMHMNP129350181    | -8.1                     | -9.3     | -10.5     |
| 36  | UMHMNP184885890    | -8.2                     | -9.3     | -11.3     | 91  | UMHMNP741259858    | -9.1                     | -9.3     | -10.5     |
| 37  | UMHMNP148010406    | -8.9                     | -10.6    | -11.3     | 92  | UMHMNP827348072    | -9.7                     | -9.7     | -10.5     |
| 38  | UMHMNP153212863    | -8.2                     | -11.2    | -11.2     | 93  | UMHMNP244157957    | -8.7                     | -11.2    | -10.5     |
| 39  | UMHMNP157622601    | -8.5                     | -9.8     | -11.2     | 94  | UMHMNP253195403    | -9.4                     | -9.5     | -10.5     |
| 40  | UMHMNP107503093    | -8.2                     | -9.7     | -11.2     | 95  | UMHMNP150079951    | -8.7                     | -9.3     | -10.5     |
| 41  | UMHMNP116303       | -9.5                     | -9.4     | -11.2     | 96  | UMHMNP77982800     | -10.9                    | -11.2    | -10.5     |
| 42  | UMHMNP53296836     | -9.9                     | -9.3     | -11.2     | 97  | UMHMNP868395884    | -9.1                     | -9.6     | -10.5     |
| 43  | UMHMNP176447964    | -9.0                     | -9.4     | -11.2     | 98  | UMHMNP1058613      | -9.5                     | -10.0    | -10.5     |
| 44  | UMHMNP119108360    | -8.9                     | -9.7     | -11.1     | 99  | UMHMNP374819086    | -8.9                     | -9.6     | -10.5     |
| 45  | UMHMNP393870332    | -8.5                     | -9.3     | -11.0     | 100 | UMHMNP474395       | -8.2                     | -9.9     | -10.5     |
| 46  | UMHMNP94203539     | -9.9                     | -10.0    | -11.0     | 101 | UMHMNP70329281     | -9.1                     | -10.1    | -10.5     |
| 47  | UMHMNP54369118     | -9.0                     | -9.4     | -11.0     | 102 | UMHMNP142796314    | -8.1                     | -10.7    | -10.5     |
| 48  | UMHMNP260436291    | -9.5                     | -9.7     | -11.0     | 103 | UMHMNP290824474    | -8.9                     | -9.5     | -10.5     |
| 49  | UMHMNP61369275     | -8.7                     | -10.0    | -11.0     | 104 | UMHMNP552839802    | -8.3                     | -9.3     | -10.5     |
| 50  | UMHMNP757976673    | -9.7                     | -9.8     | -11.0     | 105 | UMHMNP862286702    | -9.3                     | -9.7     | -10.5     |
| 51  | UMHMNP106231258    | -9.7                     | -9.7     | -11.0     | 106 | UMHMNP2122987      | -9.4                     | -9.4     | -10.4     |
| 52  | UMHMNP54028465     | -9.9                     | -9.8     | -11.0     | 107 | UMHMNP73622238     | -9.9                     | -10.1    | -10.4     |
| 53  | UMHMNP664992272    | -9.0                     | -10.1    | -11.0     | 108 | UMHMNP386274868    | -8.8                     | -10.3    | -10.4     |
| 54  | UMHMNP86748314     | -8.1                     | -9.3     | -11.0     | 109 | UMHMNP745075245    | -8.2                     | -9.3     | -10.4     |

Table S2. Continued.

| No. | Compound Name/Code | Docking Score (kcal/mol) |          |           | No. | Compound Name/Code | Docking Score (kcal/mol) |          |           |
|-----|--------------------|--------------------------|----------|-----------|-----|--------------------|--------------------------|----------|-----------|
|     |                    | Fast                     | Moderate | Expensive |     |                    | Fast                     | Moderate | Expensive |
| 110 | UMHMNP80981379     | -9.2                     | -9.4     | -10.4     | 166 | UMHMNP82866339     | -10.9                    | -11.2    | -10.0     |
| 111 | UMHMNP142755133    | -8.5                     | -9.3     | -10.4     | 167 | UMHMNP83115473     | -8.5                     | -9.5     | -10.0     |
| 112 | UMHMNP173792580    | -8.6                     | -9.3     | -10.4     | 168 | UMHMNP84025321     | -8.8                     | -10.1    | -10.0     |
| 113 | UMHMNP23518981     | -8.7                     | -9.7     | -10.4     | 169 | UMHMNP85733795     | -9.6                     | -9.3     | -10.0     |
| 114 | UMHMNP77944037     | -9.2                     | -9.4     | -10.4     | 170 | UMHMNP244157968    | -9.6                     | -9.3     | -10.0     |
| 115 | UMHMNP142755144    | -9.9                     | -10.0    | -10.4     | 171 | UMHMNP81826495     | -8.4                     | -9.3     | -10.0     |
| 116 | UMHMNP156953934    | -10.9                    | -9.4     | -10.4     | 172 | UMHMNP168569184    | -8.2                     | -9.3     | -10.0     |
| 117 | UMHMNP135091111    | -8.3                     | -9.3     | -10.4     | 173 | UMHMNP19254694     | -9.1                     | -9.3     | -10.0     |
| 118 | UMHMNP152845744    | -9.1                     | -9.8     | -10.4     | 174 | UMHMNP70022718     | -9.6                     | -10.2    | -10.0     |
| 119 | UMHMNP2418453      | -8.1                     | -10.1    | -10.4     | 175 | UMHMNP74185129     | -8.2                     | -9.3     | -10.0     |
| 120 | UMHMNP623167715    | -8.4                     | -10.0    | -10.4     | 176 | UMHMNP83704103     | -9.0                     | -9.5     | -10.0     |
| 121 | UMHMNP6377180      | -8.2                     | -9.3     | -10.4     | 177 | UMHMNP110012185    | -8.0                     | -9.5     | -10.0     |
| 122 | UMHMNP133613771    | -8.4                     | -10.0    | -10.4     | 178 | UMHMNP253340293    | -10.8                    | -11.2    | -10.0     |
| 123 | UMHMNP99528877     | -10.4                    | -10.4    | -10.4     | 179 | UMHMNP75605855     | -9.5                     | -9.8     | -10.0     |
| 124 | UMHMNP142796303    | -9.7                     | -10.0    | -10.4     | 180 | UMHMNP80735064     | -9.9                     | -10.0    | -10.0     |
| 125 | UMHMNP516869       | -10.2                    | -10.5    | -10.4     | 181 | UMHMNP122143902    | -9.4                     | -9.3     | -10.0     |
| 126 | UMHMNP109152376    | -9.3                     | -9.3     | -10.3     | 182 | UMHMNP143380396    | -8.7                     | -9.3     | -10.0     |
| 127 | UMHMNP126149904    | -8.8                     | -9.8     | -10.3     | 183 | UMHMNP166797746    | -8.6                     | -9.3     | -10.0     |
| 128 | UMHMNP890041675    | -8.9                     | -9.3     | -10.3     | 184 | UMHMNP481141       | -8.3                     | -9.4     | -10.0     |
| 129 | UMHMNP19698669     | -8.8                     | -9.5     | -10.3     | 185 | UMHMNP63109193     | -8.2                     | -9.5     | -10.0     |
| 130 | UMHMNP6901606      | -8.9                     | -9.4     | -10.3     | 186 | UMHMNP6891356      | -9.2                     | -9.3     | -10.0     |
| 131 | UMHMNP77643244     | -9.6                     | -9.8     | -10.3     | 187 | UMHMNP123314216    | -8.1                     | -10.0    | -10.0     |
| 132 | UMHMNP84223030     | -8.8                     | -9.3     | -10.3     | 188 | UMHMNP196500762    | -8.9                     | -9.8     | -10.0     |
| 133 | UMHMNP139765347    | -10.0                    | -9.5     | -10.3     | 189 | UMHMNP50335030     | -8.6                     | -9.3     | -10.0     |
| 134 | UMHMNP151109545    | -8.6                     | -9.3     | -10.3     | 190 | UMHMNP160666546    | -9.5                     | -10.9    | -10.0     |
| 135 | UMHMNP870095344    | -9.8                     | -9.9     | -10.3     | 191 | UMHMNP104048171    | -9.5                     | -9.9     | -10.0     |
| 136 | UMHMNP152130615    | -9.0                     | -9.8     | -10.3     | 192 | UMHMNP201800615    | -8.1                     | -9.9     | -10.0     |
| 137 | UMHMNP53216027     | -8.9                     | -9.3     | -10.3     | 193 | UMHMNP58028232     | -8.2                     | -10.0    | -10.0     |
| 138 | UMHMNP870535129    | -9.9                     | -10.0    | -10.3     | 194 | UMHMNP221169762    | -8.3                     | -9.6     | -10.0     |
| 139 | UMHMNP175992991    | -9.3                     | -9.3     | -10.3     | 195 | UMHMNP260436279    | -8.5                     | -9.3     | -10.0     |
| 140 | UMHMNP196500784    | -8.5                     | -9.5     | -10.2     | 196 | UMHMNP94451215     | -8.8                     | -9.3     | -10.0     |
| 141 | UMHMNP61843796     | -9.1                     | -10.1    | -10.2     | 197 | UMHMNP104928305    | -9.9                     | -10.1    | -10.0     |
| 142 | UMHMNP681227032    | -8.2                     | -9.5     | -10.2     | 198 | UMHMNP221169739    | -8.7                     | -10.1    | -10.0     |
| 143 | UMHMNP91283919     | -9.9                     | -11.0    | -10.2     | 199 | UMHMNP244157979    | -9.6                     | -10.5    | -10.0     |
| 144 | UMHMNP165815849    | -9.5                     | -11.2    | -10.2     | 200 | UMHMNP862200495    | -9.8                     | -9.3     | -10.0     |
| 145 | UMHMNP97614647     | -9.3                     | -9.3     | -10.2     | 201 | UMHMNP134128168    | -10.8                    | -10.4    | -10.0     |
| 146 | UMHMNP196403926    | -8.9                     | -9.8     | -10.2     | 202 | UMHMNP162232395    | -8.3                     | -9.3     | -10.0     |
| 147 | UMHMNP682808895    | -9.0                     | -10.9    | -10.2     | 203 | UMHMNP54854921     | -9.2                     | -9.3     | -10.0     |
| 148 | UMHMNP208927155    | -8.9                     | -9.4     | -10.2     | 204 | UMHMNP55688443     | -8.4                     | -9.3     | -10.0     |
| 149 | UMHMNP29782658     | -9.5                     | -9.5     | -10.2     | 205 | UMHMNP123165800    | -9.9                     | -9.5     | -10.0     |
| 150 | UMHMNP86105648     | -10.8                    | -9.3     | -10.2     | 206 | UMHMNP128229641    | -8.1                     | -9.3     | -10.0     |
| 151 | UMHMNP888041267    | -8.9                     | -9.3     | -10.1     | 207 | UMHMNP23670942     | -8.7                     | -9.9     | -10.0     |
| 152 | UMHMNP124727077    | -9.7                     | -9.9     | -10.1     | 208 | UMHMNP474679       | -8.3                     | -9.5     | -10.0     |
| 153 | UMHMNP149355759    | -9.7                     | -9.8     | -10.1     | 209 | UMHMNP648428324    | -8.5                     | -9.6     | -10.0     |
| 154 | UMHMNP155645515    | -8.3                     | -9.9     | -10.1     | 210 | UMHMNP676271833    | -9.9                     | -10.7    | -10.0     |
| 155 | UMHMNP72509616     | -8.4                     | -9.7     | -10.1     | 211 | UMHMNP735278281    | -9.2                     | -9.3     | -10.0     |
| 156 | UMHMNP116972931    | -8.9                     | -9.4     | -10.1     | 212 | UMHMNP134131183    | -8.9                     | -9.3     | -10.0     |
| 157 | UMHMNP114127785    | -9.3                     | -9.3     | -10.1     | 213 | UMHMNP171864805    | -8.2                     | -9.9     | -10.0     |
| 158 | UMHMNP115982202    | -10.9                    | -10.4    | -10.1     | 214 | UMHMNP55688432     | -8.1                     | -9.5     | -10.0     |
| 159 | UMHMNP133562499    | -8.2                     | -10.5    | -10.1     | 215 | UMHMNP68520263     | -9.6                     | -10.9    | -10.0     |
| 160 | UMHMNP40446068     | -8.5                     | -9.9     | -10.0     | 216 | UMHMNP72007944     | -9.4                     | -9.4     | -10.0     |
| 161 | UMHMNP53822983     | -8.7                     | -9.3     | -10.0     | 217 | UMHMNP80375184     | -8.9                     | -9.6     | -10.0     |
| 162 | UMHMNP57082367     | -8.5                     | -10.0    | -10.0     | 218 | UMHMNP810685564    | -9.1                     | -9.6     | -10.0     |
| 163 | UMHMNP118574735    | -8.7                     | -9.7     | -10.0     | 219 | UMHMNP854203784    | -8.9                     | -9.8     | -10.0     |
| 164 | UMHMNP22260464     | -8.0                     | -9.7     | -10.0     | 220 | UMHMNP97649042     | -8.3                     | -9.3     | -10.0     |
| 165 | UMHMNP405095945    | -8.1                     | -9.9     | -10.0     | 221 | UMHMNP102396178    | -10.1                    | -10.1    | -10.0     |

Table S2. Continued.

| No. | Compound Name/Code | Docking Score (kcal/mol) |          |           | No. | Compound Name/Code | Docking Score (kcal/mol) |          |           |
|-----|--------------------|--------------------------|----------|-----------|-----|--------------------|--------------------------|----------|-----------|
|     |                    | Fast                     | Moderate | Expensive |     |                    | Fast                     | Moderate | Expensive |
| 222 | UMHMNP28949668     | -8.4                     | -10.0    | -10.0     | 278 | UMHMNP27065958     | -9.4                     | -9.3     | -9.9      |
| 223 | UMHMNP80925060     | -8.2                     | -9.8     | -10.0     | 279 | UMHMNP3903579      | -8.8                     | -9.6     | -9.9      |
| 224 | UMHMNP83681792     | -9.4                     | -9.6     | -10.0     | 280 | UMHMNP681260093    | -9.5                     | -9.5     | -9.9      |
| 225 | UMHMNP858950400    | -9.5                     | -9.6     | -10.0     | 281 | UMHMNP136762942    | -9.2                     | -10.1    | -9.9      |
| 226 | UMHMNP105064300    | -9.7                     | -9.8     | -10.0     | 282 | UMHMNP140429374    | -9.7                     | -9.8     | -9.9      |
| 227 | UMHMNP151247697    | -9.2                     | -9.3     | -10.0     | 283 | UMHMNP143572730    | -8.7                     | -9.3     | -9.9      |
| 228 | UMHMNP53296847     | -8.5                     | -9.3     | -10.0     | 284 | UMHMNP150050127    | -9.0                     | -9.5     | -9.9      |
| 229 | UMHMNP137576002    | -9.2                     | -9.5     | -10.0     | 285 | UMHMNP84582627     | -9.4                     | -10.2    | -9.9      |
| 230 | UMHMNP17666834     | -9.2                     | -9.6     | -10.0     | 286 | UMHMNP852469375    | -8.4                     | -9.7     | -9.9      |
| 231 | UMHMNP57800585     | -8.9                     | -9.3     | -10.0     | 287 | UMHMNP114820245    | -9.5                     | -10.5    | -9.9      |
| 232 | UMHMNP832723736    | -8.5                     | -10.2    | -10.0     | 288 | UMHMNP151890812    | -9.6                     | -9.6     | -9.9      |
| 233 | UMHMNP117675191    | -8.6                     | -9.3     | -10.0     | 289 | UMHMNP213547285    | -8.7                     | -9.3     | -9.9      |
| 234 | UMHMNP145398603    | -9.8                     | -9.9     | -10.0     | 290 | UMHMNP214483155    | -8.8                     | -9.7     | -9.9      |
| 235 | UMHMNP185014599    | -8.6                     | -9.3     | -10.0     | 291 | UMHMNP283176136    | -9.6                     | -9.6     | -9.9      |
| 236 | UMHMNP29939977     | -8.1                     | -9.3     | -10.0     | 292 | UMHMNP76758219     | -10.2                    | -10.8    | -9.9      |
| 237 | UMHMNP50909869     | -8.7                     | -9.3     | -10.0     | 293 | UMHMNP124561202    | -8.6                     | -9.5     | -9.9      |
| 238 | UMHMNP121714747    | -9.8                     | -9.3     | -9.9      | 294 | UMHMNP151564022    | -9.1                     | -9.3     | -9.9      |
| 239 | UMHMNP56525736     | -8.3                     | -10.0    | -9.9      | 295 | UMHMNP153209122    | -8.4                     | -9.7     | -9.9      |
| 240 | UMHMNP876756568    | -8.8                     | -10.2    | -9.9      | 296 | UMHMNP19716268     | -9.2                     | -9.3     | -9.9      |
| 241 | UMHMNP136762997    | -8.4                     | -9.4     | -9.9      | 297 | UMHMNP32352651     | -9.6                     | -9.3     | -9.9      |
| 242 | UMHMNP189083781    | -9.3                     | -9.3     | -9.9      | 298 | UMHMNP479411455    | -9.2                     | -9.3     | -9.9      |
| 243 | UMHMNP193008263    | -9.3                     | -9.3     | -9.9      | 299 | UMHMNP123158907    | -9.0                     | -10.0    | -9.9      |
| 244 | UMHMNP4298004      | -9.4                     | -10.4    | -9.9      | 300 | UMHMNP141321133    | -8.4                     | -9.9     | -9.9      |
| 245 | UMHMNP88147197     | -9.3                     | -10.2    | -9.9      | 301 | UMHMNP143049154    | -10.3                    | -10.3    | -9.9      |
| 246 | UMHMNP121678873    | -9.2                     | -10.3    | -9.9      | 302 | UMHMNP168004851    | -9.1                     | -9.3     | -9.9      |
| 247 | UMHMNP133883224    | -9.7                     | -9.7     | -9.9      | 303 | UMHMNP188111708    | -9.2                     | -9.4     | -9.9      |
| 248 | UMHMNP78342388     | -8.4                     | -9.3     | -9.9      | 304 | UMHMNP2364230      | -9.2                     | -9.8     | -9.9      |
| 249 | UMHMNP85617750     | -9.8                     | -9.9     | -9.9      | 305 | UMHMNP851610907    | -9.8                     | -10.0    | -9.9      |
| 250 | UMHMNP90108637     | -10.1                    | -10.1    | -9.9      | 306 | UMHMNP97564948     | -9.7                     | -9.8     | -9.9      |
| 251 | UMHMNP115268434    | -8.8                     | -9.3     | -9.9      | 307 | UMHMNP106534445    | -9.4                     | -9.4     | -9.9      |
| 252 | UMHMNP211358655    | -8.8                     | -9.7     | -9.9      | 308 | UMHMNP113592817    | -10.1                    | -10.2    | -9.9      |
| 253 | UMHMNP25747448     | -9.8                     | -9.3     | -9.9      | 309 | UMHMNP38636509     | -8.6                     | -10.1    | -9.9      |
| 254 | UMHMNP272118066    | -8.6                     | -9.5     | -9.9      | 310 | UMHMNP76758208     | -9.8                     | -10.0    | -9.9      |
| 255 | UMHMNP76094569     | -9.5                     | -9.5     | -9.9      | 311 | UMHMNP874193610    | -9.9                     | -10.0    | -9.9      |
| 256 | UMHMNP858950444    | -8.9                     | -9.3     | -9.9      | 312 | UMHMNP139765336    | -9.8                     | -10.0    | -9.9      |
| 257 | UMHMNP90195418     | -9.5                     | -9.3     | -9.9      | 313 | UMHMNP14050625     | -9.7                     | -9.8     | -9.9      |
| 258 | UMHMNP102054455    | -9.5                     | -9.9     | -9.9      | 314 | UMHMNP160098931    | -8.7                     | -9.3     | -9.9      |
| 259 | UMHMNP136781958    | -9.8                     | -10.3    | -9.9      | 315 | UMHMNP306971120    | -10.7                    | -10.7    | -9.9      |
| 260 | UMHMNP199600390    | -8.4                     | -9.7     | -9.9      | 316 | UMHMNP329050228    | -9.8                     | -9.9     | -9.9      |
| 261 | UMHMNP62410962     | -10.1                    | -9.3     | -9.9      | 317 | UMHMNP474624       | -9.1                     | -10.1    | -9.9      |
| 262 | UMHMNP83115440     | -9.4                     | -9.5     | -9.9      | 318 | UMHMNP52936706     | -8.8                     | -9.6     | -9.9      |
| 263 | UMHMNP125127573    | -8.6                     | -9.3     | -9.9      | 319 | UMHMNP55688454     | -9.2                     | -10.2    | -9.9      |
| 264 | UMHMNP57874        | -8.2                     | -9.3     | -9.9      | 320 | UMHMNP693790748    | -9.7                     | -9.3     | -9.9      |
| 265 | UMHMNP78370840     | -8.8                     | -9.8     | -9.9      | 321 | UMHMNP753457942    | -8.3                     | -9.3     | -9.9      |
| 266 | UMHMNP94806049     | -9.5                     | -9.6     | -9.9      | 322 | UMHMNP85733762     | -9.7                     | -9.7     | -9.9      |
| 267 | UMHMNP113597038    | -9.0                     | -9.6     | -9.9      | 323 | UMHMNP134887277    | -8.7                     | -9.3     | -9.9      |
| 268 | UMHMNP119147125    | -8.9                     | -9.7     | -9.9      | 324 | UMHMNP150931832    | -9.5                     | -9.5     | -9.9      |
| 269 | UMHMNP233607711    | -8.8                     | -9.9     | -9.9      | 325 | UMHMNP329050251    | -9.0                     | -9.9     | -9.9      |
| 270 | UMHMNP73792935     | -8.4                     | -9.5     | -9.9      | 326 | UMHMNP870535118    | -9.1                     | -9.3     | -9.9      |
| 271 | UMHMNP83454        | -9.9                     | -10.0    | -9.9      | 327 | UMHMNP17752168     | -9.3                     | -10.2    | -9.9      |
| 272 | UMHMNP871943985    | -9.8                     | -10.1    | -9.9      | 328 | UMHMNP5371540      | -10.1                    | -10.1    | -9.9      |
| 273 | UMHMNP132911456    | -8.1                     | -10.4    | -9.9      | 329 | UMHMNP675106226    | -8.1                     | -9.3     | -9.9      |
| 274 | UMHMNP142755155    | -9.3                     | -9.4     | -9.9      | 330 | UMHMNP851610861    | -9.1                     | -9.3     | -9.9      |
| 275 | UMHMNP151890845    | -8.9                     | -9.8     | -9.9      | 331 | UMHMNP211239417    | -8.8                     | -9.7     | -9.9      |
| 276 | UMHMNP200942183    | -8.1                     | -9.3     | -9.9      | 332 | UMHMNP24778516     | -9.3                     | -9.5     | -9.9      |
| 277 | UMHMNP244157980    | -8.8                     | -9.7     | -9.9      | 333 | UMHMNP32450252     | -9.5                     | -9.4     | -9.9      |

Table S2. Continued.

| No. | Compound Name/Code | Docking Score (kcal/mol) |          |           | No. | Compound Name/Code | Docking Score (kcal/mol) |          |           |
|-----|--------------------|--------------------------|----------|-----------|-----|--------------------|--------------------------|----------|-----------|
|     |                    | Fast                     | Moderate | Expensive |     |                    | Fast                     | Moderate | Expensive |
| 334 | UMHMNP4736565      | -9.2                     | -9.3     | -9.9      | 390 | UMHMNP105969640    | -9.7                     | -9.3     | -9.8      |
| 335 | UMHMNP78285844     | -10.1                    | -10.4    | -9.9      | 391 | UMHMNP144686420    | -9.8                     | -9.3     | -9.8      |
| 336 | UMHMNP140389497    | -8.1                     | -9.4     | -9.9      | 392 | UMHMNP53296665     | -9.7                     | -9.8     | -9.8      |
| 337 | UMHMNP150627364    | -8.3                     | -9.3     | -9.9      | 393 | UMHMNP83115484     | -9.3                     | -9.4     | -9.8      |
| 338 | UMHMNP473030       | -8.6                     | -9.3     | -9.9      | 394 | UMHMNP858950557    | -9.4                     | -9.4     | -9.8      |
| 339 | UMHMNP89495476     | -9.5                     | -10.1    | -9.9      | 395 | UMHMNP100942721    | -9.1                     | -9.6     | -9.8      |
| 340 | UMHMNP116407217    | -10.3                    | -9.4     | -9.9      | 396 | UMHMNP1247649      | -9.5                     | -9.9     | -9.8      |
| 341 | UMHMNP119212281    | -8.2                     | -9.3     | -9.9      | 397 | UMHMNP134887266    | -9.3                     | -10.5    | -9.8      |
| 342 | UMHMNP132310908    | -10.4                    | -9.3     | -9.9      | 398 | UMHMNP149260742    | -8.8                     | -9.3     | -9.8      |
| 343 | UMHMNP149260800    | -8.7                     | -9.5     | -9.9      | 399 | UMHMNP161776767    | -8.1                     | -9.3     | -9.8      |
| 344 | UMHMNP151890834    | -9.5                     | -9.4     | -9.9      | 400 | UMHMNP173681522    | -8.3                     | -11.2    | -9.8      |
| 345 | UMHMNP20780410     | -9.6                     | -9.5     | -9.9      | 401 | UMHMNP219832378    | -8.6                     | -9.9     | -9.8      |
| 346 | UMHMNP233607722    | -8.7                     | -9.7     | -9.9      | 402 | UMHMNP81387839     | -9.3                     | -9.9     | -9.8      |
| 347 | UMHMNP73731245     | -9.6                     | -9.3     | -9.9      | 403 | UMHMNP863919179    | -9.6                     | -9.8     | -9.8      |
| 348 | UMHMNP80388507     | -9.2                     | -9.3     | -9.9      | 404 | UMHMNP97888158     | -10.0                    | -10.0    | -9.8      |
| 349 | UMHMNP114820290    | -8.8                     | -9.3     | -9.9      | 405 | UMHMNP102054466    | -8.3                     | -9.7     | -9.8      |
| 350 | UMHMNP121714747    | -9.8                     | -9.3     | -9.9      | 406 | UMHMNP102607761    | -10.1                    | -10.1    | -9.8      |
| 351 | UMHMNP193008274    | -8.5                     | -9.3     | -9.9      | 407 | UMHMNP112923407    | -8.5                     | -9.3     | -9.8      |
| 352 | UMHMNP459832678    | -9.3                     | -9.3     | -9.9      | 408 | UMHMNP149378563    | -9.0                     | -9.3     | -9.8      |
| 353 | UMHMNP80525491     | -9.2                     | -9.6     | -9.9      | 409 | UMHMNP158149543    | -10.5                    | -10.2    | -9.8      |
| 354 | UMHMNP847605769    | -9.7                     | -10.0    | -9.9      | 410 | UMHMNP179523387    | -8.1                     | -9.3     | -9.8      |
| 355 | UMHMNP84873143     | -8.9                     | -9.6     | -9.9      | 411 | UMHMNP197381605    | -10.9                    | -9.6     | -9.8      |
| 356 | UMHMNP886851269    | -8.4                     | -9.9     | -9.9      | 412 | UMHMNP50868503     | -8.9                     | -9.6     | -9.8      |
| 357 | UMHMNP126297390    | -8.8                     | -9.7     | -9.8      | 413 | UMHMNP52936693     | -8.8                     | -10.1    | -9.8      |
| 358 | UMHMNP18099246     | -8.9                     | -9.4     | -9.8      | 414 | UMHMNP59048872     | -9.0                     | -9.5     | -9.8      |
| 359 | UMHMNP2140467      | -8.1                     | -9.8     | -9.8      | 415 | UMHMNP63121062     | -8.8                     | -9.5     | -9.8      |
| 360 | UMHMNP224784489    | -8.7                     | -9.3     | -9.8      | 416 | UMHMNP866403716    | -9.2                     | -9.5     | -9.8      |
| 361 | UMHMNP477935969    | -8.2                     | -9.8     | -9.8      | 417 | UMHMNP96363063     | -10.1                    | -10.1    | -9.8      |
| 362 | UMHMNP55945749     | -9.6                     | -9.8     | -9.8      | 418 | UMHMNP102054488    | -9.5                     | -9.8     | -9.8      |
| 363 | UMHMNP858950466    | -9.2                     | -9.3     | -9.8      | 419 | UMHMNP116079539    | -8.9                     | -10.2    | -9.8      |
| 364 | UMHMNP133738484    | -8.2                     | -9.3     | -9.8      | 420 | UMHMNP132214234    | -8.8                     | -10.3    | -9.8      |
| 365 | UMHMNP168075147    | -9.3                     | -9.3     | -9.8      | 421 | UMHMNP157459240    | -9.3                     | -9.7     | -9.8      |
| 366 | UMHMNP186593862    | -10.0                    | -10.3    | -9.8      | 422 | UMHMNP2137168      | -9.5                     | -10.3    | -9.8      |
| 367 | UMHMNP233607697    | -8.5                     | -9.5     | -9.8      | 423 | UMHMNP334491257    | -8.1                     | -9.3     | -9.8      |
| 368 | UMHMNP607388874    | -8.5                     | -9.8     | -9.8      | 424 | UMHMNP53282681     | -9.1                     | -9.3     | -9.8      |
| 369 | UMHMNP78094005     | -8.6                     | -9.3     | -9.8      | 425 | UMHMNP752211908    | -9.4                     | -9.5     | -9.8      |
| 370 | UMHMNP78183296     | -8.6                     | -9.4     | -9.8      | 426 | UMHMNP771534362    | -10.0                    | -10.0    | -9.8      |
| 371 | UMHMNP97889560     | -8.8                     | -9.3     | -9.8      | 427 | UMHMNP169565779    | -8.1                     | -9.7     | -9.8      |
| 372 | UMHMNP168569151    | -8.2                     | -9.3     | -9.8      | 428 | UMHMNP171784104    | -8.7                     | -9.3     | -9.8      |
| 373 | UMHMNP246036862    | -10.0                    | -9.5     | -9.8      | 429 | UMHMNP199012867    | -9.5                     | -9.8     | -9.8      |
| 374 | UMHMNP34751252     | -8.6                     | -10.7    | -9.8      | 430 | UMHMNP693790737    | -9.1                     | -10.1    | -9.8      |
| 375 | UMHMNP639512199    | -8.7                     | -9.8     | -9.8      | 431 | UMHMNP823804837    | -8.7                     | -9.3     | -9.8      |
| 376 | UMHMNP720681630    | -10.1                    | -10.5    | -9.8      | 432 | UMHMNP219832356    | -8.4                     | -9.3     | -9.7      |
| 377 | UMHMNP102054477    | -8.3                     | -9.7     | -9.8      | 433 | UMHMNP4680379      | -8.1                     | -9.9     | -9.7      |
| 378 | UMHMNP161470253    | -8.1                     | -9.6     | -9.8      | 434 | UMHMNP681240608    | -9.4                     | -9.4     | -9.7      |
| 379 | UMHMNP172377503    | -9.7                     | -11.0    | -9.8      | 435 | UMHMNP83198270     | -10.2                    | -10.5    | -9.7      |
| 380 | UMHMNP477885384    | -9.0                     | -9.4     | -9.8      | 436 | UMHMNP85733739     | -9.7                     | -9.7     | -9.7      |
| 381 | UMHMNP75197385     | -8.5                     | -9.3     | -9.8      | 437 | UMHMNP94806050     | -8.8                     | -9.8     | -9.7      |
| 382 | UMHMNP862587186    | -8.6                     | -10.0    | -9.8      | 438 | UMHMNP114550753    | -9.9                     | -10.0    | -9.7      |
| 383 | UMHMNP94806027     | -9.3                     | -9.8     | -9.8      | 439 | UMHMNP131487019    | -8.3                     | -9.9     | -9.7      |
| 384 | UMHMNP123332876    | -8.2                     | -9.3     | -9.8      | 440 | UMHMNP229956472    | -8.0                     | -9.5     | -9.7      |
| 385 | UMHMNP185331946    | -9.0                     | -9.3     | -9.8      | 441 | UMHMNP61947942     | -9.0                     | -9.3     | -9.7      |
| 386 | UMHMNP37976888     | -10.3                    | -9.6     | -9.8      | 442 | UMHMNP194148997    | -8.1                     | -9.4     | -9.7      |
| 387 | UMHMNP55544359     | -8.3                     | -9.6     | -9.8      | 443 | UMHMNP22149695     | -8.0                     | -9.7     | -9.7      |
| 388 | UMHMNP71242494     | -9.8                     | -9.9     | -9.8      | 444 | UMHMNP22350498     | -9.4                     | -9.9     | -9.7      |
| 389 | UMHMNP83728818     | -9.7                     | -10.0    | -9.8      | 445 | UMHMNP433717385    | -9.0                     | -9.4     | -9.7      |

Table S2. Continued.

| No. | Compound Name/Code | Docking Score (kcal/mol) |          |           | No. | Compound Name/Code | Docking Score (kcal/mol) |          |           |
|-----|--------------------|--------------------------|----------|-----------|-----|--------------------|--------------------------|----------|-----------|
|     |                    | Fast                     | Moderate | Expensive |     |                    | Fast                     | Moderate | Expensive |
| 446 | UMHMNP481174       | -8.8                     | -10.7    | -9.7      | 502 | UMHMNP62008042     | -10.0                    | -9.5     | -9.7      |
| 447 | UMHMNP681240631    | -9.3                     | -9.4     | -9.7      | 503 | UMHMNP108868957    | -9.6                     | -9.5     | -9.6      |
| 448 | UMHMNP85733784     | -9.2                     | -9.5     | -9.7      | 504 | UMHMNP153444872    | -9.2                     | -9.4     | -9.6      |
| 449 | UMHMNP152110082    | -8.2                     | -9.3     | -9.7      | 505 | UMHMNP193074496    | -9.3                     | -9.3     | -9.6      |
| 450 | UMHMNP171784091    | -8.9                     | -9.3     | -9.7      | 506 | UMHMNP290353683    | -9.4                     | -9.6     | -9.6      |
| 451 | UMHMNP200625269    | -8.3                     | -9.8     | -9.7      | 507 | UMHMNP474635       | -8.3                     | -9.3     | -9.6      |
| 452 | UMHMNP33646785     | -8.8                     | -9.5     | -9.7      | 508 | UMHMNP61897903     | -8.6                     | -9.4     | -9.6      |
| 453 | UMHMNP478364180    | -8.7                     | -10.2    | -9.7      | 509 | UMHMNP67314152     | -9.3                     | -9.3     | -9.6      |
| 454 | UMHMNP64997520     | -9.8                     | -10.3    | -9.7      | 510 | UMHMNP81306583     | -9.2                     | -9.4     | -9.6      |
| 455 | UMHMNP75917894     | -8.2                     | -9.3     | -9.7      | 511 | UMHMNP109152332    | -8.9                     | -9.6     | -9.6      |
| 456 | UMHMNP96886123     | -8.7                     | -9.7     | -9.7      | 512 | UMHMNP121449943    | -8.4                     | -9.5     | -9.6      |
| 457 | UMHMNP16066524     | -8.8                     | -11.1    | -9.7      | 513 | UMHMNP122540276    | -9.8                     | -9.8     | -9.6      |
| 458 | UMHMNP85748125     | -10.1                    | -10.1    | -9.7      | 514 | UMHMNP145398647    | -9.6                     | -9.3     | -9.6      |
| 459 | UMHMNP92264136     | -9.4                     | -9.5     | -9.7      | 515 | UMHMNP159813679    | -8.6                     | -10.5    | -9.6      |
| 460 | UMHMNP114820278    | -9.7                     | -9.7     | -9.7      | 516 | UMHMNP169564969    | -8.1                     | -9.7     | -9.6      |
| 461 | UMHMNP123158952    | -8.3                     | -10.2    | -9.7      | 517 | UMHMNP54602072     | -8.4                     | -10.3    | -9.6      |
| 462 | UMHMNP131711369    | -9.8                     | -9.5     | -9.7      | 518 | UMHMNP76836174     | -9.1                     | -9.5     | -9.6      |
| 463 | UMHMNP148717913    | -10.5                    | -9.9     | -9.7      | 519 | UMHMNP78285866     | -8.8                     | -9.4     | -9.6      |
| 464 | UMHMNP151606245    | -8.1                     | -9.3     | -9.7      | 520 | UMHMNP866403738    | -10.8                    | -10.9    | -9.6      |
| 465 | UMHMNP223271770    | -8.7                     | -9.3     | -9.7      | 521 | UMHMNP148371088    | -8.9                     | -9.5     | -9.6      |
| 466 | UMHMNP244303773    | -8.8                     | -9.7     | -9.7      | 522 | UMHMNP160014880    | -8.4                     | -11.2    | -9.6      |
| 467 | UMHMNP287965280    | -10.0                    | -10.1    | -9.7      | 523 | UMHMNP55309687     | -8.1                     | -9.3     | -9.6      |
| 468 | UMHMNP33168773     | -9.4                     | -9.7     | -9.7      | 524 | UMHMNP76376324     | -9.1                     | -9.3     | -9.6      |
| 469 | UMHMNP473739401    | -8.3                     | -9.3     | -9.7      | 525 | UMHMNP88191064     | -9.7                     | -10.3    | -9.6      |
| 470 | UMHMNP69081885     | -9.4                     | -9.4     | -9.7      | 526 | UMHMNP107585013    | -9.0                     | -9.3     | -9.6      |
| 471 | UMHMNP134128157    | -9.7                     | -9.7     | -9.7      | 527 | UMHMNP114820303    | -10.4                    | -10.4    | -9.6      |
| 472 | UMHMNP149764329    | -9.0                     | -9.3     | -9.7      | 528 | UMHMNP172854783    | -8.9                     | -10.6    | -9.6      |
| 473 | UMHMNP157459251    | -9.3                     | -9.7     | -9.7      | 529 | UMHMNP243668124    | -9.7                     | -9.7     | -9.6      |
| 474 | UMHMNP244066055    | -8.6                     | -9.7     | -9.7      | 530 | UMHMNP78418458     | -8.6                     | -9.4     | -9.6      |
| 475 | UMHMNP63635438     | -8.2                     | -9.3     | -9.7      | 531 | UMHMNP97888147     | -10.4                    | -10.4    | -9.6      |
| 476 | UMHMNP710324962    | -9.7                     | -9.7     | -9.7      | 532 | UMHMNP115982199    | -9.3                     | -9.3     | -9.6      |
| 477 | UMHMNP158758419    | -8.8                     | -9.3     | -9.7      | 533 | UMHMNP121714769    | -9.5                     | -9.3     | -9.6      |
| 478 | UMHMNP2643029      | -9.8                     | -10.0    | -9.7      | 534 | UMHMNP178200936    | -8.9                     | -10.8    | -9.6      |
| 479 | UMHMNP481254       | -9.0                     | -9.3     | -9.7      | 535 | UMHMNP521040       | -10.1                    | -9.3     | -9.6      |
| 480 | UMHMNP75795890     | -9.5                     | -9.8     | -9.7      | 536 | UMHMNP681240620    | -8.1                     | -9.5     | -9.6      |
| 481 | UMHMNP77715867     | -9.7                     | -9.9     | -9.7      | 537 | UMHMNP76758184     | -8.8                     | -9.3     | -9.6      |
| 482 | UMHMNP83681816     | -8.8                     | -9.4     | -9.7      | 538 | UMHMNP77794811     | -10.1                    | -9.5     | -9.6      |
| 483 | UMHMNP882524916    | -9.6                     | -9.9     | -9.7      | 539 | UMHMNP78342402     | -9.7                     | -9.8     | -9.6      |
| 484 | UMHMNP109152398    | -9.5                     | -9.5     | -9.7      | 540 | UMHMNP80358005     | -8.9                     | -9.4     | -9.6      |
| 485 | UMHMNP114836872    | -8.1                     | -9.3     | -9.7      | 541 | UMHMNP80677765     | -9.2                     | -9.5     | -9.6      |
| 486 | UMHMNP141344107    | -9.9                     | -9.9     | -9.7      | 542 | UMHMNP160632280    | -9.1                     | -9.6     | -9.6      |
| 487 | UMHMNP19383870     | -8.2                     | -9.4     | -9.7      | 543 | UMHMNP287964867    | -10.2                    | -10.1    | -9.6      |
| 488 | UMHMNP197381570    | -9.4                     | -9.5     | -9.7      | 544 | UMHMNP433717534    | -9.2                     | -9.3     | -9.6      |
| 489 | UMHMNP204716041    | -8.9                     | -9.4     | -9.7      | 545 | UMHMNP55688501     | -9.7                     | -9.5     | -9.6      |
| 490 | UMHMNP58497293     | -10.5                    | -9.3     | -9.7      | 546 | UMHMNP107168570    | -9.9                     | -10.1    | -9.6      |
| 491 | UMHMNP705279716    | -9.1                     | -9.3     | -9.7      | 547 | UMHMNP133883177    | -10.7                    | -10.8    | -9.6      |
| 492 | UMHMNP119760848    | -10.4                    | -10.3    | -9.7      | 548 | UMHMNP169387740    | -8.2                     | -9.5     | -9.6      |
| 493 | UMHMNP134981785    | -8.3                     | -9.3     | -9.7      | 549 | UMHMNP232585158    | -8.7                     | -9.9     | -9.6      |
| 494 | UMHMNP154563798    | -8.3                     | -9.4     | -9.7      | 550 | UMHMNP246037605    | -8.6                     | -10.1    | -9.6      |
| 495 | UMHMNP165815827    | -8.6                     | -9.5     | -9.7      | 551 | UMHMNP26040006     | -8.4                     | -9.5     | -9.6      |
| 496 | UMHMNP191212369    | -8.6                     | -9.8     | -9.7      | 552 | UMHMNP368421356    | -8.7                     | -9.3     | -9.6      |
| 497 | UMHMNP221300001    | -8.4                     | -9.5     | -9.7      | 553 | UMHMNP452934951    | -8.0                     | -10.4    | -9.6      |
| 498 | UMHMNP34212936     | -8.6                     | -9.5     | -9.7      | 554 | UMHMNP64907240     | -9.5                     | -9.4     | -9.6      |
| 499 | UMHMNP37772035     | -9.7                     | -10.0    | -9.7      | 555 | UMHMNP80357999     | -8.4                     | -9.4     | -9.6      |
| 500 | UMHMNP508193315    | -9.8                     | -9.3     | -9.7      | 556 | UMHMNP156472898    | -8.9                     | -9.5     | -9.6      |
| 501 | UMHMNP567726       | -9.2                     | -9.4     | -9.7      | 557 | UMHMNP184885072    | -9.5                     | -9.5     | -9.6      |

Table S2. Continued.

| No. | Compound Name/Code | Docking Score (kcal/mol) |          |           | No. | Compound Name/Code | Docking Score (kcal/mol) |          |           |
|-----|--------------------|--------------------------|----------|-----------|-----|--------------------|--------------------------|----------|-----------|
|     |                    | Fast                     | Moderate | Expensive |     |                    | Fast                     | Moderate | Expensive |
| 558 | UMHMNP23869161     | -10.0                    | -9.4     | -9.6      | 614 | UMHMNP119539752    | -8.2                     | -9.3     | -9.6      |
| 559 | UMHMNP242467534    | -9.7                     | -9.7     | -9.6      | 615 | UMHMNP132214245    | -9.0                     | -9.9     | -9.6      |
| 560 | UMHMNP81262966     | -9.3                     | -10.1    | -9.6      | 616 | UMHMNP221169751    | -8.3                     | -9.5     | -9.6      |
| 561 | UMHMNP82507264     | -9.7                     | -9.7     | -9.6      | 617 | UMHMNP287964856    | -10.4                    | -10.5    | -9.6      |
| 562 | UMHMNP86105659     | -9.2                     | -9.5     | -9.6      | 618 | UMHMNP52645097     | -8.5                     | -9.9     | -9.6      |
| 563 | UMHMNP133530253    | -8.3                     | -9.5     | -9.6      | 619 | UMHMNP57830        | -9.2                     | -9.5     | -9.6      |
| 564 | UMHMNP15146619     | -8.1                     | -10.4    | -9.6      | 620 | UMHMNP745075267    | -9.4                     | -9.6     | -9.6      |
| 565 | UMHMNP152833608    | -9.4                     | -9.3     | -9.6      | 621 | UMHMNP77983267     | -9.7                     | -9.8     | -9.6      |
| 566 | UMHMNP170894367    | -9.5                     | -9.8     | -9.6      | 622 | UMHMNP82637056     | -9.7                     | -9.7     | -9.6      |
| 567 | UMHMNP96603020     | -9.1                     | -9.3     | -9.6      | 623 | UMHMNP96313950     | -10.1                    | -10.3    | -9.6      |
| 568 | UMHMNP126596030    | -8.1                     | -10.0    | -9.6      | 624 | UMHMNP180603672    | -9.4                     | -9.6     | -9.6      |
| 569 | UMHMNP158402610    | -8.6                     | -10.3    | -9.6      | 625 | UMHMNP181306741    | -8.4                     | -9.3     | -9.6      |
| 570 | UMHMNP211555021    | -9.3                     | -9.8     | -9.6      | 626 | UMHMNP185331957    | -9.3                     | -9.4     | -9.6      |
| 571 | UMHMNP306997422    | -8.6                     | -10.4    | -9.6      | 627 | UMHMNP196500773    | -8.4                     | -9.4     | -9.6      |
| 572 | UMHMNP3963379      | -9.4                     | -9.9     | -9.6      | 628 | UMHMNP20465901     | -8.7                     | -10.1    | -9.6      |
| 573 | UMHMNP516370       | -8.8                     | -9.8     | -9.6      | 629 | UMHMNP41083970     | -8.5                     | -9.3     | -9.6      |
| 574 | UMHMNP120154963    | -8.4                     | -10.9    | -9.6      | 630 | UMHMNP517900582    | -9.2                     | -9.6     | -9.6      |
| 575 | UMHMNP184584405    | -9.4                     | -9.3     | -9.6      | 631 | UMHMNP75266250     | -9.4                     | -9.4     | -9.6      |
| 576 | UMHMNP313042       | -9.6                     | -9.6     | -9.6      | 632 | UMHMNP82507253     | -8.8                     | -9.3     | -9.6      |
| 577 | UMHMNP393828336    | -8.8                     | -9.3     | -9.6      | 633 | UMHMNP86690144     | -10.2                    | -10.5    | -9.6      |
| 578 | UMHMNP4936101      | -8.2                     | -9.6     | -9.6      | 634 | UMHMNP114820267    | -9.7                     | -9.7     | -9.6      |
| 579 | UMHMNP70165456     | -10.7                    | -9.3     | -9.6      | 635 | UMHMNP126596029    | -9.6                     | -9.9     | -9.6      |
| 580 | UMHMNP85748136     | -10.0                    | -10.0    | -9.6      | 636 | UMHMNP133562524    | -8.6                     | -9.3     | -9.6      |
| 581 | UMHMNP94444254     | -8.4                     | -9.3     | -9.6      | 637 | UMHMNP144398550    | -8.8                     | -9.7     | -9.6      |
| 582 | UMHMNP126622615    | -8.4                     | -10.1    | -9.6      | 638 | UMHMNP2061645      | -8.1                     | -9.3     | -9.6      |
| 583 | UMHMNP129829909    | -8.5                     | -9.8     | -9.6      | 639 | UMHMNP337379198    | -9.9                     | -9.3     | -9.6      |
| 584 | UMHMNP14729294     | -8.9                     | -9.3     | -9.6      | 640 | UMHMNP80525479     | -8.5                     | -9.5     | -9.6      |
| 585 | UMHMNP157521090    | -9.4                     | -9.8     | -9.6      | 641 | UMHMNP83511846     | -9.6                     | -10.0    | -9.6      |
| 586 | UMHMNP21317817     | -9.2                     | -10.1    | -9.6      | 642 | UMHMNP882400853    | -9.5                     | -9.5     | -9.6      |
| 587 | UMHMNP226716945    | -9.1                     | -10.1    | -9.6      | 643 | UMHMNP100994556    | -9.0                     | -9.3     | -9.6      |
| 588 | UMHMNP61586003     | -9.1                     | -10.5    | -9.6      | 644 | UMHMNP124596607    | -8.5                     | -11.2    | -9.6      |
| 589 | UMHMNP156953898    | -9.3                     | -11.2    | -9.6      | 645 | UMHMNP142780436    | -8.3                     | -9.3     | -9.6      |
| 590 | UMHMNP160014879    | -8.3                     | -9.7     | -9.6      | 646 | UMHMNP157758742    | -8.1                     | -10.6    | -9.6      |
| 591 | UMHMNP171440247    | -8.9                     | -10.6    | -9.6      | 647 | UMHMNP195259826    | -9.6                     | -10.5    | -9.6      |
| 592 | UMHMNP178115907    | -8.8                     | -9.4     | -9.6      | 648 | UMHMNP51630581     | -9.2                     | -9.3     | -9.6      |
| 593 | UMHMNP37299084     | -9.6                     | -9.5     | -9.6      | 649 | UMHMNP58701705     | -9.5                     | -10.1    | -9.6      |
| 594 | UMHMNP452082596    | -8.4                     | -10.6    | -9.6      | 650 | UMHMNP76343947     | -9.8                     | -9.9     | -9.6      |
| 595 | UMHMNP97614625     | -8.8                     | -9.3     | -9.6      | 651 | UMHMNP771534384    | -9.6                     | -9.6     | -9.6      |
| 596 | UMHMNP107168581    | -8.2                     | -9.7     | -9.6      | 652 | UMHMNP81387840     | -9.3                     | -9.4     | -9.6      |
| 597 | UMHMNP134887255    | -8.3                     | -9.4     | -9.6      | 653 | UMHMNP87532283     | -9.2                     | -9.3     | -9.6      |
| 598 | UMHMNP154496874    | -10.9                    | -10.5    | -9.6      | 654 | UMHMNP141266060    | -9.4                     | -9.4     | -9.6      |
| 599 | UMHMNP172173987    | -8.5                     | -9.3     | -9.6      | 655 | UMHMNP214483235    | -8.1                     | -9.6     | -9.6      |
| 600 | UMHMNP298196744    | -8.1                     | -9.3     | -9.6      | 656 | UMHMNP264254866    | -9.7                     | -9.8     | -9.6      |
| 601 | UMHMNP72542495     | -9.3                     | -9.4     | -9.6      | 657 | UMHMNP50909858     | -9.6                     | -10.4    | -9.6      |
| 602 | UMHMNP89411314     | -8.8                     | -9.3     | -9.6      | 658 | UMHMNP61973408     | -9.5                     | -10.0    | -9.6      |
| 603 | UMHMNP145176858    | -8.5                     | -9.3     | -9.6      | 659 | UMHMNP651489       | -8.2                     | -9.9     | -9.6      |
| 604 | UMHMNP26808275     | -9.7                     | -9.8     | -9.6      | 660 | UMHMNP161536249    | -8.4                     | -9.4     | -9.6      |
| 605 | UMHMNP321847103    | -8.3                     | -9.3     | -9.6      | 661 | UMHMNP181034935    | -9.9                     | -10.4    | -9.6      |
| 606 | UMHMNP75886123     | -9.7                     | -9.8     | -9.6      | 662 | UMHMNP39832310     | -9.3                     | -9.3     | -9.6      |
| 607 | UMHMNP76898481     | -9.6                     | -9.7     | -9.6      | 663 | UMHMNP61737971     | -9.1                     | -9.6     | -9.6      |
| 608 | UMHMNP864514590    | -9.6                     | -9.8     | -9.6      | 664 | UMHMNP674819466    | -8.8                     | -9.5     | -9.6      |
| 609 | UMHMNP86748303     | -9.9                     | -10.3    | -9.6      | 665 | UMHMNP72534135     | -8.4                     | -9.7     | -9.6      |
| 610 | UMHMNP125282135    | -8.4                     | -9.3     | -9.6      | 666 | UMHMNP81120743     | -8.7                     | -9.8     | -9.6      |
| 611 | UMHMNP147391819    | -8.2                     | -9.3     | -9.6      | 667 | UMHMNP850145129    | -9.7                     | -9.9     | -9.6      |
| 612 | UMHMNP5813650      | -8.3                     | -9.3     | -9.6      | 668 | UMHMNP94806038     | -9.3                     | -9.8     | -9.6      |
| 613 | UMHMNP81275823     | -10.4                    | -10.4    | -9.6      | 669 | UMHMNP103005205    | -9.6                     | -9.7     | -9.6      |

Table S2. Continued.

| No. | Compound Name/Code | Docking Score (kcal/mol) |          |           | No. | Compound Name/Code | Docking Score (kcal/mol) |          |           |
|-----|--------------------|--------------------------|----------|-----------|-----|--------------------|--------------------------|----------|-----------|
|     |                    | Fast                     | Moderate | Expensive |     |                    | Fast                     | Moderate | Expensive |
| 670 | UMHMNP109152343    | -10.0                    | -10.5    | -9.6      | 726 | UMHMNP87307286     | -8.9                     | -9.3     | -9.6      |
| 671 | UMHMNP145038579    | -9.5                     | -9.3     | -9.6      | 727 | UMHMNP112781234    | -9.3                     | -9.5     | -9.6      |
| 672 | UMHMNP179936528    | -8.6                     | -9.4     | -9.6      | 728 | UMHMNP121825443    | -8.3                     | -10.2    | -9.6      |
| 673 | UMHMNP26531715     | -8.6                     | -10.3    | -9.6      | 729 | UMHMNP163318783    | -8.3                     | -11.2    | -9.6      |
| 674 | UMHMNP798557989    | -9.4                     | -10.0    | -9.6      | 730 | UMHMNP17991672     | -9.2                     | -9.5     | -9.6      |
| 675 | UMHMNP86105682     | -8.9                     | -10.2    | -9.6      | 731 | UMHMNP221160845    | -8.6                     | -9.7     | -9.6      |
| 676 | UMHMNP114820289    | -9.1                     | -9.3     | -9.6      | 732 | UMHMNP38636496     | -9.8                     | -9.5     | -9.6      |
| 677 | UMHMNP143049121    | -8.4                     | -9.9     | -9.6      | 733 | UMHMNP614748628    | -9.1                     | -9.3     | -9.6      |
| 678 | UMHMNP14958668     | -8.1                     | -9.3     | -9.6      | 734 | UMHMNP862522       | -9.5                     | -9.5     | -9.6      |
| 679 | UMHMNP175673582    | -8.5                     | -9.9     | -9.6      | 735 | UMHMNP153415351    | -9.4                     | -9.3     | -9.6      |
| 680 | UMHMNP199600345    | -8.7                     | -9.5     | -9.6      | 736 | UMHMNP153698909    | -8.4                     | -10.0    | -9.6      |
| 681 | UMHMNP209167259    | -9.4                     | -9.6     | -9.6      | 737 | UMHMNP174796782    | -8.4                     | -9.3     | -9.6      |
| 682 | UMHMNP570898       | -9.0                     | -10.3    | -9.6      | 738 | UMHMNP175861800    | -8.4                     | -9.4     | -9.6      |
| 683 | UMHMNP75373625     | -8.5                     | -9.3     | -9.6      | 739 | UMHMNP183381068    | -8.5                     | -9.4     | -9.6      |
| 684 | UMHMNP858950386    | -9.8                     | -9.8     | -9.6      | 740 | UMHMNP199600378    | -8.4                     | -9.7     | -9.6      |
| 685 | UMHMNP861676575    | -9.3                     | -9.3     | -9.6      | 741 | UMHMNP250147194    | -9.2                     | -10.0    | -9.6      |
| 686 | UMHMNP862288902    | -9.3                     | -9.7     | -9.6      | 742 | UMHMNP306967760    | -9.7                     | -9.9     | -9.6      |
| 687 | UMHMNP87697992     | -8.1                     | -9.4     | -9.6      | 743 | UMHMNP395070889    | -8.7                     | -9.5     | -9.6      |
| 688 | UMHMNP108675634    | -8.9                     | -9.8     | -9.6      | 744 | UMHMNP425368598    | -8.4                     | -9.8     | -9.6      |
| 689 | UMHMNP114820256    | -8.2                     | -9.4     | -9.6      | 745 | UMHMNP81657398     | -9.9                     | -9.3     | -9.6      |
| 690 | UMHMNP132922873    | -8.6                     | -10.0    | -9.6      | 746 | UMHMNP81657796     | -9.3                     | -9.3     | -9.6      |
| 691 | UMHMNP141754576    | -9.5                     | -9.5     | -9.6      | 747 | UMHMNP85505664     | -8.4                     | -9.7     | -9.6      |
| 692 | UMHMNP189457269    | -9.5                     | -9.5     | -9.6      | 748 | UMHMNP93426916     | -9.9                     | -10.1    | -9.6      |
| 693 | UMHMNP196500808    | -8.7                     | -9.3     | -9.6      | 749 | UMHMNP109979171    | -9.4                     | -9.4     | -9.6      |
| 694 | UMHMNP34427639     | -10.6                    | -10.7    | -9.6      | 750 | UMHMNP156352657    | -8.9                     | -10.3    | -9.6      |
| 695 | UMHMNP63109171     | -9.5                     | -11.0    | -9.6      | 751 | UMHMNP161776756    | -8.5                     | -9.3     | -9.6      |
| 696 | UMHMNP71932064     | -10.7                    | -10.7    | -9.6      | 752 | UMHMNP188968447    | -8.4                     | -9.6     | -9.6      |
| 697 | UMHMNP83487        | -9.3                     | -9.8     | -9.6      | 753 | UMHMNP448264651    | -8.2                     | -9.7     | -9.6      |
| 698 | UMHMNP103190143    | -9.2                     | -9.4     | -9.6      | 754 | UMHMNP636599901    | -8.1                     | -9.3     | -9.6      |
| 699 | UMHMNP140384709    | -9.0                     | -9.3     | -9.6      | 755 | UMHMNP143016868    | -9.9                     | -10.7    | -9.6      |
| 700 | UMHMNP175669100    | -8.1                     | -11.2    | -9.6      | 756 | UMHMNP149064346    | -8.4                     | -9.9     | -9.6      |
| 701 | UMHMNP53755092     | -9.1                     | -9.3     | -9.6      | 757 | UMHMNP14908168     | -9.3                     | -9.3     | -9.6      |
| 702 | UMHMNP694436618    | -9.8                     | -10.2    | -9.6      | 758 | UMHMNP155850887    | -8.8                     | -10.7    | -9.6      |
| 703 | UMHMNP74799556     | -8.3                     | -9.3     | -9.6      | 759 | UMHMNP179730360    | -8.4                     | -9.4     | -9.6      |
| 704 | UMHMNP78285855     | -10.4                    | -10.5    | -9.6      | 760 | UMHMNP183593706    | -10.9                    | -11.0    | -9.6      |
| 705 | UMHMNP78342377     | -8.8                     | -9.8     | -9.6      | 761 | UMHMNP268735575    | -10.0                    | -10.0    | -9.6      |
| 706 | UMHMNP90352208     | -8.5                     | -9.3     | -9.6      | 762 | UMHMNP57885        | -8.5                     | -9.3     | -9.6      |
| 707 | UMHMNP134985072    | -8.3                     | -9.3     | -9.6      | 763 | UMHMNP74055428     | -9.4                     | -9.8     | -9.6      |
| 708 | UMHMNP16826418     | -8.5                     | -9.3     | -9.6      | 764 | UMHMNP85198216     | -9.7                     | -10.6    | -9.6      |
| 709 | UMHMNP172854772    | -8.6                     | -9.3     | -9.6      | 765 | UMHMNP94354980     | -10.0                    | -10.1    | -9.6      |
| 710 | UMHMNP194148975    | -9.3                     | -9.4     | -9.6      | 766 | UMHMNP107551746    | -10.0                    | -9.3     | -9.6      |
| 711 | UMHMNP100667752    | -9.4                     | -9.3     | -9.6      | 767 | UMHMNP117857724    | -8.7                     | -9.7     | -9.6      |
| 712 | UMHMNP143503224    | -8.4                     | -9.4     | -9.6      | 768 | UMHMNP1242019      | -9.6                     | -9.5     | -9.6      |
| 713 | UMHMNP173681533    | -8.8                     | -9.3     | -9.6      | 769 | UMHMNP13963138     | -9.5                     | -9.3     | -9.6      |
| 714 | UMHMNP71678030     | -9.0                     | -9.3     | -9.6      | 770 | UMHMNP152845755    | -8.1                     | -10.2    | -9.6      |
| 715 | UMHMNP1174921      | -9.6                     | -9.3     | -9.6      | 771 | UMHMNP2465114      | -9.4                     | -10.5    | -9.6      |
| 716 | UMHMNP128855072    | -9.0                     | -9.4     | -9.6      | 772 | UMHMNP50611864     | -9.0                     | -9.3     | -9.6      |
| 717 | UMHMNP140866202    | -9.8                     | -9.9     | -9.6      | 773 | UMHMNP53755105     | -8.7                     | -11.2    | -9.6      |
| 718 | UMHMNP306997397    | -9.2                     | -9.3     | -9.6      | 774 | UMHMNP71885206     | -10.0                    | -9.4     | -9.6      |
| 719 | UMHMNP31893353     | -8.7                     | -10.0    | -9.6      | 775 | UMHMNP735278270    | -8.2                     | -9.3     | -9.6      |
| 720 | UMHMNP65773980     | -9.3                     | -9.4     | -9.6      | 776 | UMHMNP93426927     | -9.2                     | -9.4     | -9.6      |
| 721 | UMHMNP675106204    | -9.1                     | -9.9     | -9.6      | 777 | UMHMNP97719783     | -9.3                     | -9.3     | -9.6      |
| 722 | UMHMNP70214925     | -10.1                    | -10.2    | -9.6      | 778 | UMHMNP106534434    | -9.2                     | -10.4    | -9.6      |
| 723 | UMHMNP75479117     | -9.2                     | -9.3     | -9.6      | 779 | UMHMNP132750482    | -8.7                     | -9.5     | -9.6      |
| 724 | UMHMNP80981631     | -8.3                     | -9.3     | -9.6      | 780 | UMHMNP37976899     | -8.8                     | -10.5    | -9.6      |
| 725 | UMHMNP86748278     | -9.8                     | -9.9     | -9.6      | 781 | UMHMNP452082609    | -9.3                     | -9.6     | -9.6      |

Table S2. Continued.

| No. | Compound Name/Code | Docking Score (kcal/mol) |          |           | No. | Compound Name/Code | Docking Score (kcal/mol) |          |           |
|-----|--------------------|--------------------------|----------|-----------|-----|--------------------|--------------------------|----------|-----------|
|     |                    | Fast                     | Moderate | Expensive |     |                    | Fast                     | Moderate | Expensive |
| 782 | UMHMNP67463790     | -9.6                     | -9.4     | -9.6      | 838 | UMHMNP145038580    | -9.0                     | -9.3     | -9.6      |
| 783 | UMHMNP749867230    | -9.8                     | -10.2    | -9.6      | 839 | UMHMNP147641723    | -9.6                     | -9.4     | -9.6      |
| 784 | UMHMNP124596629    | -8.8                     | -10.1    | -9.6      | 840 | UMHMNP162290417    | -8.3                     | -9.3     | -9.6      |
| 785 | UMHMNP141859974    | -9.7                     | -9.6     | -9.6      | 841 | UMHMNP24041665     | -9.0                     | -9.4     | -9.6      |
| 786 | UMHMNP14231335     | -9.4                     | -10.0    | -9.6      | 842 | UMHMNP40772121     | -8.5                     | -9.6     | -9.6      |
| 787 | UMHMNP191789783    | -9.0                     | -10.0    | -9.6      | 843 | UMHMNP494862714    | -8.7                     | -9.4     | -9.6      |
| 788 | UMHMNP133883199    | -9.1                     | -9.3     | -9.6      | 844 | UMHMNP549520743    | -9.7                     | -9.3     | -9.6      |
| 789 | UMHMNP134515530    | -9.1                     | -9.7     | -9.6      | 845 | UMHMNP64180718     | -8.3                     | -10.7    | -9.6      |
| 790 | UMHMNP214483199    | -8.9                     | -9.3     | -9.6      | 846 | UMHMNP876620245    | -8.5                     | -9.7     | -9.6      |
| 791 | UMHMNP315209086    | -8.8                     | -9.7     | -9.6      | 847 | UMHMNP128802175    | -9.3                     | -9.9     | -9.6      |
| 792 | UMHMNP41083903     | -10.4                    | -9.3     | -9.6      | 848 | UMHMNP129620231    | -9.0                     | -10.5    | -9.6      |
| 793 | UMHMNP452929645    | -8.7                     | -10.0    | -9.6      | 849 | UMHMNP130246989    | -8.5                     | -9.8     | -9.6      |
| 794 | UMHMNP69511202     | -8.3                     | -9.5     | -9.6      | 850 | UMHMNP133738473    | -8.2                     | -9.5     | -9.6      |
| 795 | UMHMNP69672680     | -9.0                     | -9.5     | -9.6      | 851 | UMHMNP186803327    | -9.0                     | -10.7    | -9.6      |
| 796 | UMHMNP804531451    | -9.1                     | -9.4     | -9.6      | 852 | UMHMNP474577       | -8.7                     | -9.5     | -9.6      |
| 797 | UMHMNP82154210     | -9.3                     | -9.3     | -9.6      | 853 | UMHMNP517900504    | -8.2                     | -9.3     | -9.6      |
| 798 | UMHMNP91297073     | -9.2                     | -9.3     | -9.6      | 854 | UMHMNP782491785    | -8.3                     | -9.6     | -9.6      |
| 799 | UMHMNP158734248    | -9.3                     | -9.3     | -9.6      | 855 | UMHMNP85733773     | -10.1                    | -10.2    | -9.6      |
| 800 | UMHMNP175702360    | -9.7                     | -9.4     | -9.6      | 856 | UMHMNP144335148    | -8.9                     | -9.6     | -9.6      |
| 801 | UMHMNP178064410    | -8.2                     | -9.8     | -9.6      | 857 | UMHMNP145212391    | -9.8                     | -10.4    | -9.6      |
| 802 | UMHMNP20817929     | -8.3                     | -9.9     | -9.6      | 858 | UMHMNP224577382    | -8.1                     | -9.3     | -9.6      |
| 803 | UMHMNP54369141     | -8.3                     | -9.3     | -9.6      | 859 | UMHMNP264618215    | -9.9                     | -9.9     | -9.6      |
| 804 | UMHMNP54602141     | -9.1                     | -9.5     | -9.6      | 860 | UMHMNP495380477    | -8.8                     | -10.8    | -9.6      |
| 805 | UMHMNP984849       | -8.5                     | -9.9     | -9.6      | 861 | UMHMNP54278896     | -8.1                     | -10.1    | -9.6      |
| 806 | UMHMNP116169290    | -9.3                     | -9.3     | -9.6      | 862 | UMHMNP57103216     | -8.9                     | -10.5    | -9.6      |
| 807 | UMHMNP122540323    | -8.9                     | -10.1    | -9.6      | 863 | UMHMNP690253771    | -8.6                     | -9.3     | -9.6      |
| 808 | UMHMNP129620253    | -8.3                     | -9.4     | -9.6      | 864 | UMHMNP73700295     | -9.8                     | -9.8     | -9.6      |
| 809 | UMHMNP175992980    | -8.3                     | -9.3     | -9.6      | 865 | UMHMNP75246763     | -9.4                     | -9.4     | -9.6      |
| 810 | UMHMNP2034722      | -9.6                     | -9.6     | -9.6      | 866 | UMHMNP871483351    | -8.4                     | -9.3     | -9.6      |
| 811 | UMHMNP306967759    | -10.0                    | -9.3     | -9.6      | 867 | UMHMNP104720152    | -9.7                     | -9.4     | -9.6      |
| 812 | UMHMNP32450263     | -8.1                     | -9.3     | -9.6      | 868 | UMHMNP106199819    | -9.7                     | -9.7     | -9.6      |
| 813 | UMHMNP54448725     | -8.2                     | -9.6     | -9.6      | 869 | UMHMNP133883202    | -9.1                     | -9.7     | -9.6      |
| 814 | UMHMNP73538575     | -9.3                     | -9.3     | -9.6      | 870 | UMHMNP1491776      | -8.3                     | -9.3     | -9.6      |
| 815 | UMHMNP78518748     | -8.0                     | -9.6     | -9.6      | 871 | UMHMNP14956242     | -10.7                    | -9.3     | -9.6      |
| 816 | UMHMNP122759675    | -9.2                     | -9.6     | -9.6      | 872 | UMHMNP189514485    | -8.1                     | -9.3     | -9.6      |
| 817 | UMHMNP127709459    | -8.5                     | -10.3    | -9.6      | 873 | UMHMNP237755167    | -8.2                     | -9.3     | -9.6      |
| 818 | UMHMNP132410356    | -8.3                     | -9.8     | -9.6      | 874 | UMHMNP487016966    | -8.8                     | -10.0    | -9.6      |
| 819 | UMHMNP153585649    | -8.2                     | -9.4     | -9.6      | 875 | UMHMNP70329258     | -8.1                     | -9.3     | -9.6      |
| 820 | UMHMNP157403333    | -9.7                     | -11.2    | -9.6      | 876 | UMHMNP123086817    | -8.7                     | -9.3     | -9.6      |
| 821 | UMHMNP17181883     | -10.7                    | -9.9     | -9.6      | 877 | UMHMNP139765303    | -8.3                     | -9.3     | -9.6      |
| 822 | UMHMNP17974786     | -9.3                     | -9.8     | -9.6      | 878 | UMHMNP16250616     | -11.4                    | -9.3     | -9.6      |
| 823 | UMHMNP211358713    | -8.2                     | -9.8     | -9.6      | 879 | UMHMNP189818493    | -8.6                     | -9.6     | -9.6      |
| 824 | UMHMNP39832309     | -8.2                     | -10.3    | -9.6      | 880 | UMHMNP263764041    | -8.4                     | -9.6     | -9.6      |
| 825 | UMHMNP566916       | -8.7                     | -9.9     | -9.6      | 881 | UMHMNP333970131    | -8.4                     | -9.4     | -9.6      |
| 826 | UMHMNP87859981     | -9.3                     | -9.9     | -9.6      | 882 | UMHMNP38788817     | -9.2                     | -9.3     | -9.6      |
| 827 | UMHMNP95062296     | -8.3                     | -9.9     | -9.6      | 883 | UMHMNP39025279     | -8.7                     | -9.9     | -9.6      |
| 828 | UMHMNP139765358    | -8.8                     | -9.8     | -9.6      | 884 | UMHMNP446862697    | -8.6                     | -9.4     | -9.6      |
| 829 | UMHMNP1452295      | -9.5                     | -10.0    | -9.6      | 885 | UMHMNP132938126    | -8.7                     | -9.3     | -9.6      |
| 830 | UMHMNP148270160    | -9.5                     | -10.3    | -9.6      | 886 | UMHMNP147395093    | -10.5                    | -9.3     | -9.6      |
| 831 | UMHMNP151345061    | -10.1                    | -10.2    | -9.6      | 887 | UMHMNP478364226    | -8.7                     | -10.2    | -9.6      |
| 832 | UMHMNP471534       | -8.1                     | -9.3     | -9.6      | 888 | UMHMNP69297490     | -8.5                     | -9.3     | -9.6      |
| 833 | UMHMNP516858       | -8.9                     | -10.3    | -9.6      | 889 | UMHMNP71031588     | -9.7                     | -9.7     | -9.6      |
| 834 | UMHMNP749216464    | -8.7                     | -9.8     | -9.6      | 890 | UMHMNP771534373    | -9.4                     | -9.5     | -9.6      |
| 835 | UMHMNP78355289     | -9.6                     | -10.6    | -9.6      | 891 | UMHMNP80525480     | -9.0                     | -9.4     | -9.6      |
| 836 | UMHMNP874221893    | -9.1                     | -9.3     | -9.6      | 892 | UMHMNP102054524    | -9.3                     | -9.3     | -9.6      |
| 837 | UMHMNP137570435    | -9.8                     | -9.8     | -9.6      | 893 | UMHMNP141859985    | -9.7                     | -9.9     | -9.6      |

Table S2. Continued.

| No. | Compound Name/Code | Docking Score (kcal/mol) |          |           | No.  | Compound Name/Code | Docking Score (kcal/mol) |          |           |
|-----|--------------------|--------------------------|----------|-----------|------|--------------------|--------------------------|----------|-----------|
|     |                    | Fast                     | Moderate | Expensive |      |                    | Fast                     | Moderate | Expensive |
| 894 | UMHMNP149260731    | -9.5                     | -9.5     | -9.6      | 950  | UMHMNP852872936    | -10.0                    | -9.3     | -9.6      |
| 895 | UMHMNP156472887    | -8.0                     | -10.1    | -9.6      | 951  | UMHMNP116972920    | -8.5                     | -9.8     | -9.6      |
| 896 | UMHMNP158822765    | -10.3                    | -9.3     | -9.6      | 952  | UMHMNP139765290    | -9.9                     | -9.3     | -9.6      |
| 897 | UMHMNP175413215    | -8.3                     | -10.1    | -9.6      | 953  | UMHMNP143007287    | -8.3                     | -9.9     | -9.6      |
| 898 | UMHMNP209408764    | -9.6                     | -9.4     | -9.6      | 954  | UMHMNP178179992    | -8.4                     | -9.4     | -9.6      |
| 899 | UMHMNP22850119     | -9.1                     | -9.3     | -9.6      | 955  | UMHMNP2259907      | -8.6                     | -9.9     | -9.6      |
| 900 | UMHMNP24041676     | -10.0                    | -9.3     | -9.6      | 956  | UMHMNP260062882    | -10.0                    | -9.3     | -9.6      |
| 901 | UMHMNP24662951     | -9.3                     | -10.2    | -9.6      | 957  | UMHMNP39533738     | -8.2                     | -9.5     | -9.6      |
| 902 | UMHMNP31220447     | -9.7                     | -10.0    | -9.6      | 958  | UMHMNP479067624    | -8.7                     | -9.3     | -9.6      |
| 903 | UMHMNP461441429    | -8.2                     | -9.3     | -9.6      | 959  | UMHMNP58560375     | -8.1                     | -9.6     | -9.6      |
| 904 | UMHMNP73723383     | -10.2                    | -10.2    | -9.6      | 960  | UMHMNP744253483    | -9.6                     | -9.8     | -9.6      |
| 905 | UMHMNP848132376    | -9.8                     | -9.9     | -9.6      | 961  | UMHMNP1159279      | -9.3                     | -9.3     | -9.6      |
| 906 | UMHMNP862200473    | -9.0                     | -9.8     | -9.6      | 962  | UMHMNP132194322    | -8.3                     | -11.2    | -9.6      |
| 907 | UMHMNP117675135    | -9.0                     | -10.0    | -9.6      | 963  | UMHMNP157622576    | -8.7                     | -9.9     | -9.6      |
| 908 | UMHMNP151890823    | -9.1                     | -9.6     | -9.6      | 964  | UMHMNP178494821    | -8.5                     | -9.5     | -9.6      |
| 909 | UMHMNP174063811    | -9.1                     | -9.3     | -9.6      | 965  | UMHMNP225662099    | -8.3                     | -10.3    | -9.6      |
| 910 | UMHMNP209408720    | -8.8                     | -9.6     | -9.6      | 966  | UMHMNP85443374     | -8.4                     | -9.7     | -9.6      |
| 911 | UMHMNP2243096      | -8.9                     | -9.4     | -9.6      | 967  | UMHMNP105369899    | -8.7                     | -9.3     | -9.6      |
| 912 | UMHMNP38819442     | -8.5                     | -9.3     | -9.6      | 968  | UMHMNP115193152    | -8.8                     | -9.3     | -9.6      |
| 913 | UMHMNP4598678      | -9.1                     | -9.8     | -9.6      | 969  | UMHMNP147170089    | -10.3                    | -10.4    | -9.6      |
| 914 | UMHMNP50335041     | -9.2                     | -9.5     | -9.6      | 970  | UMHMNP169217452    | -8.5                     | -9.9     | -9.6      |
| 915 | UMHMNP64687850     | -8.5                     | -10.3    | -9.6      | 971  | UMHMNP334491279    | -8.1                     | -9.3     | -9.6      |
| 916 | UMHMNP81387851     | -9.9                     | -9.4     | -9.6      | 972  | UMHMNP395070903    | -9.4                     | -9.3     | -9.6      |
| 917 | UMHMNP96253600     | -9.6                     | -9.6     | -9.6      | 973  | UMHMNP495380488    | -8.6                     | -9.3     | -9.6      |
| 918 | UMHMNP135729452    | -9.4                     | -9.6     | -9.6      | 974  | UMHMNP51529125     | -8.1                     | -9.6     | -9.6      |
| 919 | UMHMNP141854695    | -9.6                     | -9.3     | -9.6      | 975  | UMHMNP724462480    | -9.4                     | -9.6     | -9.6      |
| 920 | UMHMNP55081395     | -9.1                     | -9.5     | -9.6      | 976  | UMHMNP85748147     | -9.8                     | -9.8     | -9.6      |
| 921 | UMHMNP601570       | -8.8                     | -9.4     | -9.6      | 977  | UMHMNP865308607    | -9.5                     | -9.5     | -9.6      |
| 922 | UMHMNP6035627      | -8.9                     | -9.8     | -9.6      | 978  | UMHMNP96736311     | -10.3                    | -10.3    | -9.6      |
| 923 | UMHMNP72154337     | -9.1                     | -9.3     | -9.6      | 979  | UMHMNP102054499    | -8.9                     | -9.5     | -9.6      |
| 924 | UMHMNP83465        | -9.2                     | -10.1    | -9.6      | 980  | UMHMNP12626185     | -8.9                     | -10.7    | -9.6      |
| 925 | UMHMNP85337151     | -9.2                     | -9.3     | -9.6      | 981  | UMHMNP143049132    | -9.7                     | -9.4     | -9.6      |
| 926 | UMHMNP142780367    | -8.9                     | -9.3     | -9.6      | 982  | UMHMNP82660615     | -9.7                     | -9.7     | -9.6      |
| 927 | UMHMNP158786755    | -9.5                     | -10.4    | -9.6      | 983  | UMHMNP118984466    | -8.8                     | -9.5     | -9.6      |
| 928 | UMHMNP163136058    | -8.1                     | -9.5     | -9.6      | 984  | UMHMNP144436066    | -8.8                     | -9.7     | -9.6      |
| 929 | UMHMNP199600367    | -9.1                     | -10.3    | -9.6      | 985  | UMHMNP185331935    | -8.9                     | -10.5    | -9.6      |
| 930 | UMHMNP326794176    | -8.3                     | -9.3     | -9.6      | 986  | UMHMNP286433805    | -10.6                    | -10.7    | -9.6      |
| 931 | UMHMNP3404226      | -9.6                     | -9.9     | -9.6      | 987  | UMHMNP516790       | -8.6                     | -9.8     | -9.6      |
| 932 | UMHMNP517900515    | -9.8                     | -9.9     | -9.6      | 988  | UMHMNP58514322     | -8.1                     | -10.4    | -9.6      |
| 933 | UMHMNP517900559    | -8.9                     | -9.5     | -9.6      | 989  | UMHMNP849752870    | -8.4                     | -9.3     | -9.6      |
| 934 | UMHMNP518069       | -9.2                     | -9.6     | -9.6      | 990  | UMHMNP96853155     | -8.8                     | -9.5     | -9.6      |
| 935 | UMHMNP65228140     | -9.5                     | -9.3     | -9.6      | 991  | UMHMNP107551757    | -10                      | -11.0    | -9.6      |
| 936 | UMHMNP745075256    | -9.1                     | -9.3     | -9.6      | 992  | UMHMNP1106134      | -8.8                     | -9.8     | -9.6      |
| 937 | UMHMNP87164338     | -9.5                     | -9.5     | -9.6      | 993  | UMHMNP116302284    | -9.2                     | -9.9     | -9.6      |
| 938 | UMHMNP876756557    | -9.4                     | -9.4     | -9.6      | 994  | UMHMNP133401113    | -8.8                     | -9.3     | -9.6      |
| 939 | UMHMNP126394749    | -8.8                     | -9.7     | -9.6      | 995  | UMHMNP25819798     | -9.7                     | -9.8     | -9.6      |
| 940 | UMHMNP133883213    | -10.9                    | -10.3    | -9.6      | 996  | UMHMNP298196733    | -9.2                     | -9.3     | -9.6      |
| 941 | UMHMNP142677121    | -8.6                     | -9.3     | -9.6      | 997  | UMHMNP313503376    | -8.1                     | -10.1    | -9.6      |
| 942 | UMHMNP14599485     | -8.9                     | -9.7     | -9.6      | 998  | UMHMNP33886747     | -8.5                     | -10.0    | -9.6      |
| 943 | UMHMNP15313696     | -9.0                     | -9.7     | -9.6      | 999  | UMHMNP90195441     | -9.1                     | -9.3     | -9.6      |
| 944 | UMHMNP161776734    | -8.9                     | -9.8     | -9.6      | 1000 | UMHMNP95062310     | -8.6                     | -9.9     | -9.6      |
| 945 | UMHMNP174630116    | -8.5                     | -10.1    | -9.6      | 1001 | UMHMNP122540312    | -9.5                     | -9.3     | -9.6      |
| 946 | UMHMNP52043013     | -9.7                     | -9.8     | -9.6      | 1002 | UMHMNP149355760    | -9.4                     | -9.4     | -9.6      |
| 947 | UMHMNP55051780     | -9.8                     | -9.3     | -9.6      | 1003 | UMHMNP165606699    | -8.4                     | -9.3     | -9.6      |
| 948 | UMHMNP68690926     | -10.3                    | -10.5    | -9.6      | 1004 | UMHMNP16910320     | -9.0                     | -9.5     | -9.6      |
| 949 | UMHMNP74799590     | -10.1                    | -10.5    | -9.6      | 1005 | UMHMNP184430011    | -10.3                    | -10.2    | -9.6      |

Table S2. Continued.

| No.  | Compound Name/Code | Docking Score (kcal/mol) |          |           | No.  | Compound Name/Code | Docking Score (kcal/mol) |          |           |
|------|--------------------|--------------------------|----------|-----------|------|--------------------|--------------------------|----------|-----------|
|      |                    | Fast                     | Moderate | Expensive |      |                    | Fast                     | Moderate | Expensive |
| 1006 | UMHMNP198274258    | -8.3                     | -10.0    | -9.6      | 1050 | UMHMNP80388461     | -9.0                     | -9.4     | -9.6      |
| 1007 | UMHMNP238758424    | -8.1                     | -10.0    | -9.6      | 1051 | UMHMNP141754587    | -8.5                     | -9.3     | -9.6      |
| 1008 | UMHMNP516552       | -8.5                     | -9.3     | -9.6      | 1052 | UMHMNP10525221     | -9.7                     | -9.8     | -9.6      |
| 1009 | UMHMNP69672704     | -9.7                     | -10.0    | -9.6      | 1053 | UMHMNP144436077    | -8.2                     | -9.6     | -9.6      |
| 1010 | UMHMNP70214992     | -10.3                    | -10.3    | -9.6      | 1054 | UMHMNP146506414    | -10.2                    | -10.3    | -9.6      |
| 1011 | UMHMNP71801495     | -9.3                     | -9.3     | -9.6      | 1055 | UMHMNP162830253    | -8.8                     | -9.5     | -9.6      |
| 1012 | UMHMNP77521        | -8.6                     | -9.4     | -9.6      | 1056 | UMHMNP166038284    | -10.4                    | -9.4     | -9.6      |
| 1013 | UMHMNP85337128     | -9.9                     | -10.0    | -9.6      | 1057 | UMHMNP815586493    | -9.8                     | -9.8     | -9.6      |
| 1014 | UMHMNP117694969    | -9.4                     | -9.6     | -9.6      | 1058 | UMHMNP217449199    | -8.4                     | -9.3     | -9.6      |
| 1015 | UMHMNP145403254    | -8.9                     | -9.7     | -9.6      | 1059 | UMHMNP85733808     | -9.2                     | -9.3     | -9.6      |
| 1016 | UMHMNP175861855    | -10.9                    | -10.2    | -9.6      | 1060 | UMHMNP149260753    | -10                      | -9.4     | -9.6      |
| 1017 | UMHMNP250141641    | -8.1                     | -9.3     | -9.6      | 1061 | UMHMNP263764018    | -9.5                     | -9.7     | -9.6      |
| 1018 | UMHMNP3090811      | -8.2                     | -10.1    | -9.6      | 1062 | UMHMNP81474615     | -9.4                     | -9.4     | -9.6      |
| 1019 | UMHMNP62861158     | -8.4                     | -9.5     | -9.6      | 1063 | UMHMNP81575066     | -9.4                     | -9.5     | -9.6      |
| 1020 | UMHMNP676271855    | -9.0                     | -9.3     | -9.6      | 1064 | UMHMNP186593839    | -9.2                     | -9.3     | -9.6      |
| 1021 | UMHMNP85066780     | -10.0                    | -9.9     | -9.6      | 1065 | UMHMNP160014868    | -8.3                     | -9.7     | -9.6      |
| 1022 | UMHMNP85733717     | -8.5                     | -9.3     | -9.6      | 1066 | UMHMNP62660202     | -8.4                     | -10.1    | -9.6      |
| 1023 | UMHMNP129602193    | -8.1                     | -9.3     | -9.6      | 1067 | UMHMNP333723981    | -9.4                     | -9.7     | -9.6      |
| 1024 | UMHMNP148471856    | -9.2                     | -9.6     | -9.6      | 1068 | UMHMNP80981664     | -9.4                     | -9.5     | -9.6      |
| 1025 | UMHMNP175861822    | -8.3                     | -9.8     | -9.6      | 1069 | UMHMNP446862722    | -8.2                     | -9.7     | -9.6      |
| 1026 | UMHMNP17974775     | -9.7                     | -9.8     | -9.6      | 1070 | UMHMNP147641712    | -8.4                     | -9.3     | -9.6      |
| 1027 | UMHMNP1981904      | -9.5                     | -11.2    | -9.6      | 1071 | UMHMNP117021064    | -8.6                     | -9.4     | -9.6      |
| 1028 | UMHMNP208708230    | -8.9                     | -10.2    | -9.6      | 1072 | UMHMNP283605458    | -9.0                     | -9.5     | -9.6      |
| 1029 | UMHMNP475111785    | -8.6                     | -9.3     | -9.6      | 1073 | UMHMNP866025629    | -10.6                    | -10.7    | -9.6      |
| 1030 | UMHMNP56121427     | -9.8                     | -9.9     | -9.6      | 1074 | UMHMNP216770295    | -9.1                     | -9.3     | -9.6      |
| 1031 | UMHMNP63015907     | -8.2                     | -9.3     | -9.6      | 1075 | UMHMNP89837978     | -9.1                     | -9.6     | -9.6      |
| 1032 | UMHMNP64285854     | -8.3                     | -9.3     | -9.6      | 1076 | UMHMNP681226415    | -9.5                     | -9.8     | -9.6      |
| 1033 | UMHMNP780755375    | -9.7                     | -9.8     | -9.6      | 1077 | UMHMNP124843681    | -8.7                     | -9.6     | -9.6      |
| 1034 | UMHMNP863684417    | -8.1                     | -9.8     | -9.6      | 1078 | UMHMNP103065209    | -9.6                     | -9.7     | -9.6      |
| 1035 | UMHMNP160098920    | -10.6                    | -11.1    | -9.6      | 1079 | UMHMNP153209111    | -9.0                     | -9.7     | -9.6      |
| 1036 | UMHMNP175861877    | -9.6                     | -9.6     | -9.6      | 1080 | UMHMNP97190313     | -8.7                     | -9.7     | -9.6      |
| 1037 | UMHMNP815586471    | -8.5                     | -9.5     | -9.6      | 1081 | UMHMNP425368623    | -9.3                     | -9.9     | -9.6      |
| 1038 | UMHMNP88191144     | -10.8                    | -10.9    | -9.6      | 1082 | UMHMNP882693461    | -8.9                     | -10.0    | -9.6      |
| 1039 | UMHMNP116079540    | -9.1                     | -9.6     | -9.6      | 1083 | UMHMNP79580282     | -8.1                     | -9.4     | -9.6      |
| 1040 | UMHMNP131727010    | -10.9                    | -9.9     | -9.6      | 1084 | UMHMNP20512316     | -8.1                     | -9.3     | -9.6      |
| 1041 | UMHMNP134985083    | -9.3                     | -9.4     | -9.6      | 1085 | UMHMNP174286227    | -8.5                     | -10.6    | -9.6      |
| 1042 | UMHMNP175861797    | -8.3                     | -9.4     | -9.6      | 1086 | UMHMNP71947643     | -9.5                     | -9.5     | -9.6      |
| 1043 | UMHMNP200497047    | -8.2                     | -9.3     | -9.6      | 1087 | UMHMNP65717886     | -8.7                     | -9.3     | -9.6      |
| 1044 | UMHMNP209169584    | -8.1                     | -9.6     | -9.6      | 1088 | UMHMNP168482346    | -8.4                     | -10.6    | -9.6      |
| 1045 | UMHMNP36011195     | -9.4                     | -9.3     | -9.6      | 1089 | UMHMNP211358666    | -8.3                     | -9.4     | -9.6      |
| 1046 | UMHMNP848132354    | -9.5                     | -9.4     | -9.6      | 1090 | UMHMNP866025630    | -9.1                     | -9.3     | -9.6      |
| 1047 | UMHMNP876756502    | -8.5                     | -9.7     | -9.6      | 1091 | UMHMNP191112193    | -9.3                     | -9.3     | -9.6      |
| 1048 | UMHMNP473256223    | -8.7                     | -9.9     | -9.6      | 1092 | UMHMNP155233311    | -8.5                     | -9.8     | -9.6      |
| 1049 | UMHMNP6758710      | -9.5                     | -10.7    | -9.6      |      |                    |                          |          |           |

<sup>a</sup>Data sorted according to stage III docking score.

**Table S3.** Estimated fast, moderate, and expensive docking scores and MM-GBSA binding energies (in kcal/mol) over 1 ns implicit water solvent MD simulations for XF7 and the top 111 potent MNPs compounds within the 3CL<sup>pro</sup> binding pocket.<sup>a</sup>

| No. | Compound Name/Code | Docking Score (kcal/mol) |          |           | MM-GBSA Binding Energy (kcal/mol) |
|-----|--------------------|--------------------------|----------|-----------|-----------------------------------|
|     |                    | Fast                     | Moderate | Expensive |                                   |
|     | XF7                | -8.1                     | -9.2     | -9.5      | -40.0                             |
| 1   | UMHMNP26195584     | -11.1                    | -11.5    | -11.5     | -45.3                             |
| 2   | UMHMNP133056094    | -11.2                    | -11.5    | -11.5     | -44.9                             |
| 3   | UMHMNP14984668     | -11.3                    | -11.7    | -12.2     | -44.8                             |
| 4   | UMHMNP148839036    | -11.3                    | -11.6    | -11.8     | -44.0                             |
| 5   | UMHMNP1403367      | -11.7                    | -12.2    | -13.4     | -42.5                             |
| 6   | UMHMNP101691127    | -11.4                    | -12.1    | -12.3     | -42.2                             |
| 7   | UMHMNP791849666    | -11.4                    | -11.9    | -12.3     | -41.8                             |
| 8   | UMHMNP143621754    | -11.3                    | -11.7    | -12.2     | -41.5                             |
| 9   | UMHMNP133056072    | -11.3                    | -11.6    | -11.7     | -41.3                             |
| 10  | UMHMNP386274857    | -11.3                    | -11.6    | -11.7     | -40.6                             |
| 11  | UMHMNP874383707    | -11.1                    | -11.5    | -11.4     | -40.5                             |
| 12  | UMHMNP221163300    | -11.1                    | -11.4    | -11.4     | -40.2                             |
| 13  | UMHMNP109152387    | -11.1                    | -11.4    | -11.4     | -40.2                             |
| 14  | UMHMNP156953912    | -11.1                    | -11.4    | -11.4     | -39.7                             |
| 15  | UMHMNP706784727    | -10.9                    | -11.3    | -11.4     | -39.6                             |
| 16  | UMHMNP5035303      | -11.0                    | -11.4    | -11.4     | -39.6                             |
| 17  | UMHMNP77982800     | -10.9                    | -11.2    | -10.5     | -39.5                             |
| 18  | UMHMNP73622238     | -9.9                     | -10.1    | -10.4     | -39.4                             |
| 19  | UMHMNP64421201     | -8.8                     | -9.5     | -10.7     | -39.3                             |
| 20  | UMHMNP745075278    | -9.9                     | -10.0    | -10.6     | -39.1                             |
| 21  | UMHMNP147362376    | -8.3                     | -9.3     | -11.3     | -38.7                             |
| 22  | UMHMNP852872925    | -8.4                     | -9.7     | -10.7     | -38.3                             |
| 23  | UMHMNP552839802    | -8.3                     | -9.3     | -10.5     | -38.1                             |
| 24  | UMHMNP151078921    | -8.8                     | -10.7    | -10.8     | -38.0                             |
| 25  | UMHMNP64548169     | -9.3                     | -9.5     | -10.7     | -37.7                             |
| 26  | UMHMNP70329281     | -9.1                     | -10.1    | -10.5     | -37.5                             |
| 27  | UMHMNP157207915    | -9.2                     | -10.8    | -11.3     | -37.3                             |
| 28  | UMHMNP151606405    | -9.4                     | -9.8     | -10.8     | -36.6                             |
| 29  | UMHMNP86708329     | -10.6                    | -10.7    | -10.8     | -36.5                             |
| 30  | UMHMNP664992272    | -9.0                     | -10.1    | -11.0     | -36.4                             |
| 31  | UMHMNP106231258    | -9.7                     | -9.7     | -11.0     | -36.4                             |
| 32  | UMHMNP474395       | -8.2                     | -9.9     | -10.5     | -36.3                             |
| 33  | UMHMNP244157957    | -8.7                     | -11.2    | -10.5     | -36.3                             |
| 34  | UMHMNP741259858    | -9.1                     | -9.3     | -10.5     | -35.9                             |
| 35  | UMHMNP244157946    | -8.6                     | -9.7     | -10.7     | -35.5                             |
| 36  | UMHMNP70139569     | -8.2                     | -9.3     | -10.7     | -35.4                             |
| 37  | UMHMNP139765370    | -8.1                     | -10.7    | -10.8     | -35.4                             |
| 38  | UMHMNP54369118     | -9.0                     | -9.4     | -11.0     | -35.2                             |
| 39  | UMHMNP116407160    | -8.7                     | -9.5     | -11.3     | -35.0                             |
| 40  | UMHMNP351443759    | -8.8                     | -9.9     | -10.7     | -34.9                             |
| 41  | UMHMNP153212863    | -8.2                     | -11.2    | -11.2     | -34.9                             |
| 42  | UMHMNP221163311    | -9.6                     | -10.5    | -10.8     | -34.7                             |
| 43  | UMHMNP153212852    | -8.4                     | -9.7     | -11.3     | -34.4                             |
| 44  | UMHMNP176447964    | -9.0                     | -9.4     | -11.2     | -34.4                             |
| 45  | UMHMNP868395884    | -9.1                     | -9.6     | -10.5     | -34.2                             |
| 46  | UMHMNP58670636     | -9.5                     | -11.0    | -11.0     | -34.2                             |
| 47  | UMHMNP116302386    | -9.4                     | -9.5     | -10.7     | -34.1                             |
| 48  | UMHMNP6673661      | -9.6                     | -10.9    | -10.9     | -34.1                             |
| 49  | UMHMNP41410586     | -8.4                     | -9.8     | -10.7     | -33.9                             |

Table S3. Continued.

| No. | Compound Name/Code | Docking Score (kcal/mol) |          |           | MM-GBSA Binding Energy (kcal/mol) |
|-----|--------------------|--------------------------|----------|-----------|-----------------------------------|
|     |                    | Fast                     | Moderate | Expensive |                                   |
| 50  | UMHMNP862286702    | -9.3                     | -9.7     | -10.5     | -33.9                             |
| 51  | UMHMNP148010406    | -8.9                     | -10.6    | -11.3     | -33.8                             |
| 52  | UMHMNP107503093    | -8.2                     | -9.7     | -11.2     | -33.6                             |
| 53  | UMHMNP124689652    | -8.9                     | -9.4     | -10.7     | -33.3                             |
| 54  | UMHMNP150079951    | -8.7                     | -9.3     | -10.5     | -33.2                             |
| 55  | UMHMNP131467000    | -10.7                    | -10.8    | -10.8     | -33.0                             |
| 56  | UMHMNP393870332    | -8.5                     | -9.3     | -11.0     | -32.9                             |
| 57  | UMHMNP253195403    | -9.4                     | -9.5     | -10.5     | -32.9                             |
| 58  | UMHMNP184885890    | -8.2                     | -9.3     | -11.3     | -32.8                             |
| 59  | UMHMNP142796314    | -8.1                     | -10.7    | -10.5     | -32.7                             |
| 60  | UMHMNP174630070    | -10.9                    | -11.0    | -10.9     | -32.5                             |
| 61  | UMHMNP272458341    | -10.0                    | -10.3    | -10.7     | -32.5                             |
| 62  | UMHMNP125329091    | -10.9                    | -9.9     | -10.9     | -32.2                             |
| 63  | UMHMNP86748314     | -8.1                     | -9.3     | -11.0     | -32.2                             |
| 64  | UMHMNP171674923    | -8.9                     | -10.8    | -10.9     | -32.1                             |
| 65  | UMHMNP260436291    | -9.5                     | -9.7     | -11.0     | -32.0                             |
| 66  | UMHMNP757976673    | -9.7                     | -9.8     | -11.0     | -31.9                             |
| 67  | UMHMNP827348072    | -9.7                     | -9.7     | -10.5     | -31.9                             |
| 68  | UMHMNP100942743    | -8.8                     | -11.2    | -11.3     | -31.9                             |
| 69  | UMHMNP142755133    | -8.5                     | -9.3     | -10.4     | -31.8                             |
| 70  | UMHMNP54028465     | -9.9                     | -9.8     | -11.0     | -31.7                             |
| 71  | UMHMNP162830264    | -9.5                     | -10.4    | -11.3     | -31.6                             |
| 72  | UMHMNP745075245    | -8.2                     | -9.3     | -10.4     | -31.3                             |
| 73  | UMHMNP116303       | -9.5                     | -9.4     | -11.2     | -31.3                             |
| 74  | UMHMNP74185049     | -10.0                    | -10.1    | -10.6     | -31.1                             |
| 75  | UMHMNP129350181    | -8.1                     | -9.3     | -10.5     | -30.8                             |
| 76  | UMHMNP823808555    | -8.4                     | -10.1    | -11.3     | -30.6                             |
| 77  | UMHMNP4030926      | -8.8                     | -9.3     | -10.7     | -30.5                             |
| 78  | UMHMNP374819086    | -8.9                     | -9.6     | -10.5     | -30.3                             |
| 79  | UMHMNP22033870     | -8.6                     | -9.7     | -11.3     | -30.2                             |
| 80  | UMHMNP152110093    | -10.2                    | -9.3     | -10.6     | -29.9                             |
| 81  | UMHMNP6673683      | -9.5                     | -9.7     | -10.6     | -29.8                             |
| 82  | UMHMNP131466972    | -8.2                     | -9.3     | -11.3     | -29.7                             |
| 83  | UMHMNP150050138    | -10.7                    | -10.7    | -11.3     | -29.7                             |
| 84  | UMHMNP444987637    | -8.3                     | -9.9     | -10.6     | -29.6                             |
| 85  | UMHMNP53296836     | -9.9                     | -9.3     | -11.2     | -29.2                             |
| 86  | UMHMNP890041722    | -10.8                    | -10.9    | -10.9     | -29.1                             |
| 87  | UMHMNP149764341    | -8.9                     | -9.6     | -11.3     | -29.1                             |
| 88  | UMHMNP165815816    | -8.6                     | -9.8     | -10.6     | -28.6                             |
| 89  | UMHMNP272458330    | -9.2                     | -9.3     | -10.7     | -27.8                             |
| 90  | UMHMNP154205182    | -9.9                     | -11.2    | -11.3     | -27.3                             |
| 91  | UMHMNP80981379     | -9.2                     | -9.4     | -10.4     | -27.3                             |
| 92  | UMHMNP290824474    | -8.9                     | -9.5     | -10.5     | -27.2                             |
| 93  | UMHMNP386274868    | -8.8                     | -10.3    | -10.4     | -27.1                             |
| 94  | UMHMNP105404840    | -10.0                    | -10.1    | -11.3     | -26.9                             |
| 95  | UMHMNP119108360    | -8.9                     | -9.7     | -11.1     | -26.2                             |
| 96  | UMHMNP61369275     | -8.7                     | -10.0    | -11.0     | -26.0                             |
| 97  | UMHMNP76915247     | -9.6                     | -9.7     | -11.3     | -25.6                             |
| 98  | UMHMNP221169740    | -8.4                     | -9.6     | -11.3     | -25.4                             |
| 99  | UMHMNP100942754    | -9.1                     | -10.7    | -11.3     | -25.2                             |
| 100 | UMHMNP161470231    | -8.9                     | -10.6    | -10.9     | -24.3                             |
| 101 | UMHMNP99528877     | -10.4                    | -10.4    | -10.4     | -24.0                             |
| 102 | UMHMNP162830231    | -8.8                     | -9.3     | -10.7     | -23.0                             |
| 103 | UMHMNP94203539     | -9.9                     | -10.0    | -11.0     | -21.8                             |
| 104 | UMHMNP149444928    | -9.1                     | -9.4     | -11.3     | -21.6                             |
| 105 | UMHMNP167172987    | -8.4                     | -9.5     | -11.3     | -21.5                             |

**Table S3.** *Continued.*

| No. | Compound Name/Code | Docking Score (kcal/mol) |          |           | MM-GBSA Binding Energy<br>(kcal/mol) |
|-----|--------------------|--------------------------|----------|-----------|--------------------------------------|
|     |                    | Fast                     | Moderate | Expensive |                                      |
| 106 | UMHMNP143049143    | -8.4                     | -9.3     | -11.0     | -21.4                                |
| 107 | UMHMNP157622601    | -8.5                     | -9.8     | -11.2     | -16.5                                |
| 108 | UMHMNP143049165    | -8.9                     | -10.6    | -11.0     | -12.2                                |
| 109 | UMHMNP2122987      | -9.4                     | -9.4     | -10.4     | -11.9                                |
| 110 | UMHMNP2497747      | -9.3                     | -9.3     | -10.7     | -11.8                                |

<sup>a</sup>Data sorted according to MM-GBSA binding energy over 1 ns implicit water solvent MD simulation.

**Table S4.** Estimated fast, moderate, and expensive docking scores and MM-GBSA binding energies (in kcal/mol) over 1 ns implicit water solvent and 5 ns explicit water solvent MD simulations for XF7 and the top 13 potent MNPs compounds within the 3CL<sup>pro</sup> binding pocket.<sup>a</sup>

| No. | Compound Name/Code | Docking Score (kcal/mol) |          |           | MM-GBSA Binding Energy (kcal/mol) |       |
|-----|--------------------|--------------------------|----------|-----------|-----------------------------------|-------|
|     |                    | Fast                     | Moderate | Expensive | 1 ns                              | 5 ns  |
|     | XF7                | -8.1                     | -9.2     | -9.5      | -40.0                             | -43.0 |
| 1   | UMHMNP1403367      | -11.7                    | -12.2    | -13.4     | -42.5                             | -55.2 |
| 2   | UMHMNP101691127    | -11.4                    | -12.1    | -12.3     | -42.2                             | -45.7 |
| 3   | UMHMNP791849666    | -11.4                    | -11.9    | -12.3     | -41.8                             | -45.1 |
| 4   | UMHMNP14984668     | -11.3                    | -11.7    | -12.2     | -44.8                             | -44.4 |
| 5   | UMHMNP143621754    | -11.3                    | -11.7    | -12.2     | -41.5                             | -42.4 |
| 6   | UMHMNP148839036    | -11.3                    | -11.6    | -11.8     | -44.0                             | -39.6 |
| 7   | UMHMNP133056072    | -11.3                    | -11.6    | -11.7     | -41.3                             | -38.4 |
| 8   | UMHMNP386274857    | -11.3                    | -11.6    | -11.7     | -40.6                             | -36.3 |
| 9   | UMHMNP133056094    | -11.2                    | -11.5    | -11.5     | -44.9                             | -35.4 |
| 10  | UMHMNP26195584     | -11.1                    | -11.5    | -11.5     | -45.3                             | -32.8 |
| 11  | UMHMNP874383707    | -11.1                    | -11.5    | -11.4     | -40.5                             | -32.5 |
| 12  | UMHMNP221163300    | -11.1                    | -11.4    | -11.4     | -40.2                             | -28.0 |
| 13  | UMHMNP109152387    | -11.1                    | -11.4    | -11.4     | -40.2                             | -27.9 |

**Table S5.** The estimated MM-GBSA binding energies (in kcal/mol) and relative binding energies ( $\Delta\Delta G_{\text{binding}}$ ) over 25 ns explicit water solvent MD simulations for XF7 and the top 5 potent MNPs compounds within the 3CL<sup>pro</sup> binding pocket.

| Compound Name/Code | $\Delta G_{\text{binding}}$ (kcal/mol) | $\Delta\Delta G_{\text{binding}}$ (kcal/mol) <sup>a</sup> |
|--------------------|----------------------------------------|-----------------------------------------------------------|
| XF7                | -45.0                                  | ---                                                       |
| UMHMNP1403367      | -57.5                                  | -12.5                                                     |
| UMHMNP143621754    | -46.8                                  | -1.8                                                      |
| UMHMNP14984668     | -45.9                                  | -0.9                                                      |
| UMHMNP791849666    | -45.3                                  | -0.3                                                      |
| UMHMNP101691127    | -45.2                                  | -0.2                                                      |

<sup>a</sup>  $\Delta\Delta G_{\text{binding}} = \Delta G_{\text{MNP}} - \Delta G_{\text{XF7}}$
